# Supplementary material for: GWAS for Systemic Sclerosis Identified six novel susceptibility loci including penetrating Fcγ-Receptor Region
Source: Research Square preprint supplement (doi:10.21203/rs.3.rs-2712663/v1), 2023-04-07
Supplement: Supplementary file 1 [file 75ff764043a6ceb0eea46c56.xlsx]

## Sheet: Data_S1
	Supplementary Data 1. Gene annotations by ANNOVAR for the lead SNPs and their LD SNPs (r2 > 0.8).
	SNP	CHR	POS	TYPE	GENE	A1	A2	MAF_case	MAF_ctrl	Beta	SE	P	r2	D'
	rs10917686	1	161658490	intergenic	RPL31P11(dist=3448),FCRLA(dist=18272)	T	C	0.0376659	0.0236694	0.702503	0.110487	2.04047e-10	0.993352	1
	rs10917688	1	161658780	intergenic	RPL31P11(dist=3738),FCRLA(dist=17982)	T	C	0.0383369	0.0237614	0.719049	0.109397	4.93536e-11	1	1
	s6697139	1	161660696	intergenic	RPL31P11(dist=5654),FCRLA(dist=16066)	T	G	0.0383383	0.0237622	0.719068	0.109396	4.9279e-11	1	1
	rs113053770	1	161672474	intergenic	RPL31P11(dist=17432),FCRLA(dist=4288)	T	C	0.0381412	0.0238786	0.712724	0.109866	8.7441e-11	0.995418	0.998587
	rs11889341	2	191943742	intronic	STAT4	T	C	0.373068	0.298798	0.369686	0.0400173	2.50768e-20	1	1
	rs12612769	2	191953998	intronic	STAT4	C	A	0.362088	0.289738	0.374717	0.0406914	3.29999e-20	0.815273	0.906161
	rs4274624	2	191958656	intronic	STAT4	C	T	0.425177	0.352293	0.351107	0.039428	5.33819e-19	0.804766	0.962453
	s4853458	2	191959489	intronic	STAT4	A	G	0.424976	0.352012	0.351276	0.0394152	5.00618e-19	0.804793	0.962338
	rs7582694	2	191970120	intronic	STAT4	C	G	0.4153	0.339364	0.344958	0.0383085	2.16386e-19	0.800843	0.964773
	rs80213143	6	138157728	ncRNA_intronic	LOC100130476	C	G	0.11199	0.081807	0.358695	0.0621273	7.76028e-09	0.903098	0.989987
	rs111425486	6	138160722	ncRNA_intronic	LOC100130476	G	A	0.111992	0.0818155	0.358639	0.0621293	7.81417e-09	0.903097	0.989987
	rs112975146	6	138165690	ncRNA_intronic	LOC100130476	C	T	0.111718	0.0818933	0.354901	0.0622175	1.16918e-08	0.90373	0.990433
	rs60022938	6	138170589	ncRNA_intronic	LOC100130476	TA	T	0.147934	0.118574	0.372232	0.0645511	8.09726e-09	0.925026	0.992522
	rs9494885	6	138172748	ncRNA_intronic	LOC100130476	C	T	0.11335	0.0815928	0.348436	0.0599586	6.19848e-09	0.851569	0.999653
	rs7774101	6	138182492	ncRNA_intronic	LOC100130476	G	A	0.113333	0.0816094	0.347963	0.0599477	6.45917e-09	0.8496	1
	rs59699063	6	138185881	ncRNA_intronic	LOC100130476	T	C	0.113293	0.0815359	0.348422	0.0599454	6.16183e-09	0.849795	1
	rs61593413	6	138185932	ncRNA_intronic	LOC100130476	A	T	0.113297	0.0815484	0.348295	0.059945	6.23656e-09	0.849652	1
	rs59693083	6	138186532	ncRNA_intronic	LOC100130476	G	A	0.11331	0.0815703	0.348055	0.0599372	6.3611e-09	0.849546	1
	rs5029926	6	138189515	intronic	TNFAIP3	G	A	0.11331	0.0815715	0.348034	0.0599365	6.3702e-09	0.849562	1
	rs5029928	6	138189942	intronic	TNFAIP3	T	C	0.11331	0.0815715	0.348034	0.0599365	6.3702e-09	0.849562	1
	rs3757173	6	138190154	intronic	TNFAIP3	G	A	0.11331	0.0815715	0.348034	0.0599365	6.3702e-09	0.849562	1
	rs57087937	6	138190529	intronic	TNFAIP3	T	C	0.110126	0.0796573	0.349501	0.0612645	1.16489e-08	0.835793	0.997182
	rs7750604	6	138190533	intronic	TNFAIP3	T	C	0.110809	0.0801096	0.350917	0.0611553	9.57397e-09	0.835737	0.99721
	rs5029930	6	138190684	intronic	TNFAIP3	C	A	0.113322	0.0815819	0.348041	0.0599363	6.36684e-09	0.849554	1
	rs719149	6	138192745	intronic	TNFAIP3	A	G	0.1133	0.0815464	0.348316	0.0599403	6.20935e-09	0.849704	1
	rs719150	6	138192761	intronic	TNFAIP3	G	A	0.115547	0.0831461	0.341161	0.0587926	6.52091e-09	0.839599	1
	rs5029937	6	138195151	intronic	TNFAIP3	T	G	0.101656	0.0695928	0.402193	0.0629531	1.67188e-10	1	1
	rs5029939	6	138195723	intronic	TNFAIP3	G	C	0.101656	0.0696154	0.401778	0.0629508	1.74299e-10	0.999797	1
	rs2230926	6	138196066	exonic	TNFAIP3	G	T	0.103646	0.0709198	0.394647	0.0617813	1.68341e-10	0.999797	1
	rs5029949	6	138197506	intronic	TNFAIP3	G	A	0.10166	0.0695912	0.402267	0.06295	1.65638e-10	1	1
	rs3834310	6	138199055	intronic	TNFAIP3	A	AG	0.144937	0.113785	0.404318	0.0647515	4.26138e-10	0.999275	0.99971
	rs9494892	6	138223489	intergenic	TNFAIP3(dist=19038),PERP(dist=186153)	T	G	0.101096	0.0694508	0.401243	0.063341	2.37936e-10	0.998536	0.999512
	rs9494893	6	138223490	intergenic	TNFAIP3(dist=19039),PERP(dist=186152)	T	G	0.101113	0.0694588	0.40127	0.0633334	2.36037e-10	0.998537	0.999512
	rs7752903	6	138227364	intergenic	TNFAIP3(dist=22913),PERP(dist=182278)	G	T	0.0995467	0.0688672	0.394997	0.0638907	6.31512e-10	0.99363	0.998933
	rs9494894	6	138228520	intergenic	TNFAIP3(dist=24069),PERP(dist=181122)	C	T	0.100113	0.0691904	0.394876	0.0636463	5.49694e-10	0.993507	0.998738
	rs148314165	6	138230038	intergenic	TNFAIP3(dist=25588),PERP(dist=179603)	G	GT	0.14106	0.110946	0.397151	0.0653939	1.25359e-09	0.993745	0.998321
	rs200820567	6	138230040	intergenic	TNFAIP3(dist=25589),PERP(dist=179602)	A	T	0.099443	0.0687159	0.396552	0.0639392	5.57581e-10	0.993328	0.99893
	rs7749323	6	138230389	intergenic	TNFAIP3(dist=25938),PERP(dist=179253)	A	G	0.0995467	0.0688672	0.394997	0.0638907	6.31512e-10	0.99363	0.998933
	rs9494895	6	138234778	intergenic	TNFAIP3(dist=30327),PERP(dist=174864)	T	C	0.100058	0.0693083	0.393062	0.0636855	6.74814e-10	0.991666	0.996908
	rs77000060	6	138237989	intergenic	TNFAIP3(dist=33538),PERP(dist=171653)	T	C	0.0970262	0.0682387	0.392191	0.0658438	2.57825e-09	0.989597	0.999522
	rs6932056	6	138242437	intergenic	TNFAIP3(dist=37986),PERP(dist=167205)	C	T	0.0964829	0.067767	0.395078	0.0661023	2.27619e-09	0.982229	0.999277
	rs6570194	6	138242638	intergenic	TNFAIP3(dist=38187),PERP(dist=167004)	C	A	0.100694	0.0707672	0.405152	0.0656679	6.84027e-10	0.977115	0.991169
	rs61117627	6	138243700	intergenic	TNFAIP3(dist=39249),PERP(dist=165942)	A	G	0.0837231	0.0590239	0.386228	0.0703822	4.0758e-08	0.840455	0.999282
	rs58721818	6	138243739	intergenic	TNFAIP3(dist=39288),PERP(dist=165903)	T	C	0.0837808	0.0591182	0.385494	0.0703844	4.32623e-08	0.841896	0.999282
	rs4728142	7	128573967	intergenic	KCP(dist=23194),IRF5(dist=3119)	A	G	0.14201	0.105012	0.34035	0.0539581	2.83191e-10	0.971983	1
	rs11269962	7	128575797	intergenic	KCP(dist=25025),IRF5(dist=1288)	T	TCTTAGCTATTGCTC	0.163305	0.126509	0.345736	0.0547686	2.74331e-10	1	1
	rs3757387	7	128576086	intergenic	KCP(dist=25313),IRF5(dist=1000)	C	T	0.140627	0.104574	0.342781	0.0549142	4.31832e-10	1	1
	rs1022745994	7	128577914	intronic	IRF5	CGCGGG	C	0.163885	0.126988	0.345467	0.0547388	2.76924e-10	0.996871	1
	rs1036713	14	105396693	intronic	PLD4	C	G	0.313324	0.369316	-0.271132	0.0414697	6.23181e-11	0.994243	0.998076
	rs2582533	14	105398787	intronic	PLD4	C	G	0.313501	0.369325	-0.270381	0.0414708	7.04168e-11	0.998034	1
	rs10083490	14	105402418	intergenic	PLD4(dist=2845),AHNAK2(dist=1170)	T	C	0.312373	0.368786	-0.273461	0.0414471	4.17198e-11	1	1
	rs10083496	14	105402786	downstream	AHNAK2(dist=802)	A	G	0.312086	0.368226	-0.272436	0.0414775	5.08988e-11	1	1
	rs10083374	14	105402994	downstream	AHNAK2(dist=594)	C	T	0.312363	0.368728	-0.273197	0.0414439	4.33987e-11	1	1
	rs10149193	14	105403474	downstream	AHNAK2(dist=114)	T	C	0.312363	0.368728	-0.273197	0.0414439	4.33989e-11	1	1
	rs1048257	14	105404384	UTR3	AHNAK2(NM_001350929:c.*16G>A,NM_138420:c.*16G>A)	C	T	0.31248	0.368819	-0.273122	0.0414488	4.41684e-11	1	1
	rs3742935	14	105405599	exonic	AHNAK2	C	G	0.321779	0.380455	-0.267413	0.040167	2.78468e-11	1	1
	rs28454709	14	105405942	exonic	AHNAK2	A	G	0.312344	0.368718	-0.273256	0.0414454	4.30599e-11	1	1
	rs2819419	14	105406238	exonic	AHNAK2	C	A	0.32178	0.380462	-0.267442	0.040167	2.77126e-11	1	1
	rs11623422	14	105407031	exonic	AHNAK2	G	A	0.312094	0.368832	-0.274437	0.0414218	3.46211e-11	1	1
	rs11851053	14	105407208	exonic	AHNAK2	C	T	0.321779	0.380443	-0.267367	0.0401677	2.80873e-11	1	1
	rs4465542	14	105407798	exonic	AHNAK2	C	T	0.321779	0.380443	-0.267366	0.0401677	2.80932e-11	1	1
	rs9671643	14	105408030	exonic	AHNAK2	G	A	0.312474	0.369412	-0.274692	0.0413757	3.15864e-11	1	1
	rs28600075	14	105408315	exonic	AHNAK2	C	T	0.312366	0.369274	-0.274709	0.0413878	3.19209e-11	1	1
	rs2819421	14	105408811	exonic	AHNAK2	G	A	0.298806	0.353152	-0.282701	0.0430433	5.10528e-11	1	1
	rs11850949	14	105408827	exonic	AHNAK2	C	A	0.299221	0.354276	-0.283312	0.0429241	4.10352e-11	1	1
	rs2819422	14	105408955	exonic	AHNAK2	G	A	0.312186	0.369226	-0.276067	0.0414476	2.72649e-11	1	1
	rs10152073	14	105409959	exonic	AHNAK2	T	G	0.31214	0.368993	-0.274888	0.0414256	3.2295e-11	1	1
	rs10438246	14	105410183	exonic	AHNAK2	C	T	0.312396	0.369255	-0.274933	0.0414263	3.20841e-11	1	1
	rs11160825	14	105410411	exonic	AHNAK2	T	C	0.302731	0.355793	-0.271957	0.0426649	1.83867e-10	1	1
	rs2819424	14	105410775	exonic	AHNAK2	G	A	0.31253	0.369267	-0.275046	0.0414731	3.31336e-11	1	1
	rs28380382	14	105410827	exonic	AHNAK2	T	C	0.312188	0.369047	-0.275011	0.0414293	3.1779e-11	1	1
	rs4264326	14	105411700	exonic	AHNAK2	G	A	0.31264	0.369459	-0.274871	0.0414327	3.26378e-11	1	1
	rs10438247	14	105411781	exonic	AHNAK2	A	G	0.311488	0.368127	-0.275082	0.0415302	3.50421e-11	1	1
	rs2819426	14	105412259	exonic	AHNAK2	C	G	0.287106	0.33983	-0.27369	0.0431914	2.34793e-10	0.946572	1
	rs12433837	14	105412541	exonic	AHNAK2	T	C	0.304144	0.359992	-0.279998	0.0422735	3.50794e-11	1	1
	rs12433815	14	105412542	exonic	AHNAK2	G	A	0.30026	0.354519	-0.279288	0.0428152	6.88662e-11	1	1
	rs12436986	14	105412554	exonic	AHNAK2	G	T	0.301319	0.35588	-0.279009	0.0426941	6.35815e-11	1	1
	rs2582514	14	105413204	exonic	AHNAK2	T	G	0.310314	0.366743	-0.276336	0.0417142	3.48399e-11	1	1
	rs55797226	14	105413223	exonic	AHNAK2	G	A	0.327269	0.381116	-0.267732	0.0415375	1.15184e-10	0.946725	1
	rs60754080	14	105414238	exonic	AHNAK2	A	C	0.284357	0.335583	-0.26968	0.0435497	5.92349e-10	0.924659	0.99754
	rs60106058	14	105414252	exonic	AHNAK2	T	C	0.283059	0.333999	-0.268902	0.0436367	7.1703e-10	0.912184	1
	rs72702027	14	105414629	exonic	AHNAK2	A	G	0.31038	0.365572	-0.272384	0.0418285	7.41974e-11	1	1
	rs2582513	14	105414790	exonic	AHNAK2	G	A	0.336713	0.388313	-0.2624	0.042184	4.95974e-10	0.97989	1
	s10145032	14	105414810	exonic	AHNAK2	G	C	0.334943	0.38691	-0.264065	0.0421998	3.91194e-10	0.980982	1
	rs11846918	14	105415469	exonic	AHNAK2	C	T	0.296925	0.347745	-0.276071	0.0441792	4.13352e-10	0.866588	0.956023
	rs2582511	14	105416010	exonic	AHNAK2	C	T	0.307361	0.361794	-0.285274	0.0430847	3.56182e-11	0.923011	0.982026
	rs2013462	14	105416959	exonic	AHNAK2	G	A	0.287856	0.326121	-0.247983	0.0480708	2.48667e-07	0.845982	0.962031
	rs2248966	14	105417102	exonic	AHNAK2	C	T	0.29696	0.338663	-0.254919	0.0467419	4.9313e-08	0.878567	0.980845
	rs2396457	14	105417766	exonic	AHNAK2	A	G	0.248191	0.285425	-0.225823	0.0472905	1.79483e-06	0.844672	0.992876
	rs2013228	14	105417774	exonic	AHNAK2	A	G	0.253056	0.290418	-0.228593	0.047405	1.42033e-06	0.864911	0.986912
	rs76231332	14	105417837	exonic	AHNAK2	G	A	0.247311	0.283956	-0.227601	0.047775	1.89771e-06	0.852183	0.989362
	rs11625007	14	105418391	exonic	AHNAK2	T	C	0.282504	0.327921	-0.267018	0.046163	7.28291e-09	0.92244	0.973202
	rs151013711	14	105418504	exonic	AHNAK2	T	G	0.263861	0.307683	-0.238948	0.0447467	9.29413e-08	0.826547	0.993411
	rs78353106	14	105418638	exonic	AHNAK2	G	A	0.263868	0.307715	-0.239071	0.0447457	9.14774e-08	0.826072	0.99339
	rs74090129	14	105419234	exonic	AHNAK2	C	T	0.265259	0.308995	-0.234907	0.0445948	1.3822e-07	0.832818	0.992078
	rs587775782	14	105560358	upstream	LINC02298(dist=118)	GAGCCGCGA	G	0.069189	0.0706896	-0.0312172	0.119663	0.794185	1	1
	A1, alternative allele; A2, reference allele; MAF, minor allele frequency; D', coefficient of linkage disquilibrium

## Sheet: Data S2
	Supplementary Data 2. Loss of function prediction by Loss-Of-Function Transcript Effect Estimator (LOFTEE) for the lead SNPs and their LD SNPs (r2 > 0.8).
	SNP	CHR	POS	R2	D'	Allele	Gene	Feature	Feature_type	Consequence	cDNA_position	CDS_position	Protein_position	Amino_acids	Codons	Existing_variation	Extra
	rs10917686	1	161658490	0.993352	1	T	ENSG00000213075	ENST00000426558	Transcript	upstream_gene_variant	-	-	-	-	-	-	IMPACT=MODIFIER;DISTANCE=3448;STRAND=-1
	rs10917686	1	161658490	0.993352	1	T	ENSG00000213075	ENST00000454082	Transcript	upstream_gene_variant	-	-	-	-	-	-	IMPACT=MODIFIER;DISTANCE=3491;STRAND=-1
	rs10917688	1	161658780	1	1	T	ENSG00000213075	ENST00000426558	Transcript	upstream_gene_variant	-	-	-	-	-	-	IMPACT=MODIFIER;DISTANCE=3738;STRAND=-1
	rs10917688	1	161658780	1	1	T	ENSG00000213075	ENST00000454082	Transcript	upstream_gene_variant	-	-	-	-	-	-	IMPACT=MODIFIER;DISTANCE=3781;STRAND=-1
	rs113053770	1	161672474	0.995418	0.998587	NA	NA	NA	NA	NA	NA	NA	NA	NA	NA	NA	NA
	rs6697139	1	161660696	1	1	T	-	-	-	intergenic_variant	-	-	-	-	-	-	IMPACT=MODIFIER
	rs11889341	2	191943742	1	1	T	ENSG00000138378	ENST00000358470	Transcript	intron_variant	-	-	-	-	-	-	IMPACT=MODIFIER;STRAND=-1
	rs11889341	2	191943742	1	1	T	ENSG00000138378	ENST00000392320	Transcript	intron_variant	-	-	-	-	-	-	IMPACT=MODIFIER;STRAND=-1
	rs11889341	2	191943742	1	1	T	ENSG00000138378	ENST00000413064	Transcript	intron_variant	-	-	-	-	-	-	IMPACT=MODIFIER;STRAND=-1;FLAGS=cds_end_NF
	rs11889341	2	191943742	1	1	T	ENSG00000138378	ENST00000495326	Transcript	intron_variant,non_coding_transcript_variant	-	-	-	-	-	-	IMPACT=MODIFIER;STRAND=-1
	rs11889341	2	191943742	1	1	T	ENSG00000138378	ENST00000495849	Transcript	intron_variant,non_coding_transcript_variant	-	-	-	-	-	-	IMPACT=MODIFIER;STRAND=-1
	rs12612769	2	191953998	0.815273	0.906161	C	ENSG00000138378	ENST00000358470	Transcript	intron_variant	-	-	-	-	-	-	IMPACT=MODIFIER;STRAND=-1
	rs12612769	2	191953998	0.815273	0.906161	C	ENSG00000138378	ENST00000392320	Transcript	intron_variant	-	-	-	-	-	-	IMPACT=MODIFIER;STRAND=-1
	rs12612769	2	191953998	0.815273	0.906161	C	ENSG00000138378	ENST00000413064	Transcript	intron_variant	-	-	-	-	-	-	IMPACT=MODIFIER;STRAND=-1;FLAGS=cds_end_NF
	rs12612769	2	191953998	0.815273	0.906161	C	ENSG00000138378	ENST00000495326	Transcript	intron_variant,non_coding_transcript_variant	-	-	-	-	-	-	IMPACT=MODIFIER;STRAND=-1
	rs12612769	2	191953998	0.815273	0.906161	C	ENSG00000138378	ENST00000495849	Transcript	intron_variant,non_coding_transcript_variant	-	-	-	-	-	-	IMPACT=MODIFIER;STRAND=-1
	rs4274624	2	191958656	0.804766	0.962453	T	ENSG00000138378	ENST00000358470	Transcript	intron_variant	-	-	-	-	-	-	IMPACT=MODIFIER;STRAND=-1
	rs4274624	2	191958656	0.804766	0.962453	T	ENSG00000138378	ENST00000392320	Transcript	intron_variant	-	-	-	-	-	-	IMPACT=MODIFIER;STRAND=-1
	rs4274624	2	191958656	0.804766	0.962453	T	ENSG00000138378	ENST00000413064	Transcript	intron_variant	-	-	-	-	-	-	IMPACT=MODIFIER;STRAND=-1;FLAGS=cds_end_NF
	rs4274624	2	191958656	0.804766	0.962453	T	ENSG00000138378	ENST00000495326	Transcript	intron_variant,non_coding_transcript_variant	-	-	-	-	-	-	IMPACT=MODIFIER;STRAND=-1
	rs4274624	2	191958656	0.804766	0.962453	T	ENSG00000138378	ENST00000495849	Transcript	intron_variant,non_coding_transcript_variant	-	-	-	-	-	-	IMPACT=MODIFIER;STRAND=-1
	rs4853458	2	191959489	0.804793	0.962338	G	ENSG00000138378	ENST00000358470	Transcript	intron_variant	-	-	-	-	-	-	IMPACT=MODIFIER;STRAND=-1
	rs4853458	2	191959489	0.804793	0.962338	G	ENSG00000138378	ENST00000392320	Transcript	intron_variant	-	-	-	-	-	-	IMPACT=MODIFIER;STRAND=-1
	rs4853458	2	191959489	0.804793	0.962338	G	ENSG00000138378	ENST00000413064	Transcript	intron_variant	-	-	-	-	-	-	IMPACT=MODIFIER;STRAND=-1;FLAGS=cds_end_NF
	rs4853458	2	191959489	0.804793	0.962338	G	ENSG00000138378	ENST00000495326	Transcript	intron_variant,non_coding_transcript_variant	-	-	-	-	-	-	IMPACT=MODIFIER;STRAND=-1
	rs4853458	2	191959489	0.804793	0.962338	G	ENSG00000138378	ENST00000495849	Transcript	intron_variant,non_coding_transcript_variant	-	-	-	-	-	-	IMPACT=MODIFIER;STRAND=-1
	rs7582694	2	191970120	0.800843	0.964773	G	ENSG00000138378	ENST00000358470	Transcript	intron_variant	-	-	-	-	-	-	IMPACT=MODIFIER;STRAND=-1
	rs7582694	2	191970120	0.800843	0.964773	G	ENSG00000138378	ENST00000392320	Transcript	intron_variant	-	-	-	-	-	-	IMPACT=MODIFIER;STRAND=-1
	rs7582694	2	191970120	0.800843	0.964773	G	ENSG00000138378	ENST00000413064	Transcript	intron_variant	-	-	-	-	-	-	IMPACT=MODIFIER;STRAND=-1;FLAGS=cds_end_NF
	rs7582694	2	191970120	0.800843	0.964773	G	ENSG00000138378	ENST00000495326	Transcript	intron_variant,non_coding_transcript_variant	-	-	-	-	-	-	IMPACT=MODIFIER;STRAND=-1
	rs7582694	2	191970120	0.800843	0.964773	G	ENSG00000138378	ENST00000495849	Transcript	intron_variant,non_coding_transcript_variant	-	-	-	-	-	-	IMPACT=MODIFIER;STRAND=-1
	rs111425486	6	138160722	0.903097	0.989987	G	ENSG00000237499	ENST00000606998	Transcript	intron_variant,non_coding_transcript_variant	-	-	-	-	-	-	IMPACT=MODIFIER;STRAND=-1
	rs112975146	6	138165690	0.90373	0.990433	C	ENSG00000237499	ENST00000606998	Transcript	intron_variant,non_coding_transcript_variant	-	-	-	-	-	-	IMPACT=MODIFIER;STRAND=-1
	rs1203883007	6	138170589	0.925026	0.992522	NA	NA	NA	NA	NA	NA	NA	NA	NA	NA	NA	NA
	rs1228676354	6	138170589	0.925026	0.992522	NA	NA	NA	NA	NA	NA	NA	NA	NA	NA	NA	NA
	rs1458193656	6	138190533	0.835737	0.99721	NA	NA	NA	NA	NA	NA	NA	NA	NA	NA	NA	NA
	rs148314165	6	138230038	0.993745	0.998321	-	-	-	-	intergenic_variant	-	-	-	-	-	-	IMPACT=MODIFIER
	rs1491493145	6	138190529	0.835793	0.997182	NA	NA	NA	NA	NA	NA	NA	NA	NA	NA	NA	NA
	rs200820567	6	138230040	0.993328	0.99893	A	-	-	-	intergenic_variant	-	-	-	-	-	-	IMPACT=MODIFIER
	rs2230926	6	138196066	0.999797	1	G	ENSG00000118503	ENST00000237289	Transcript	missense_variant	446	380	127	F/C	tTc/tGc	-	IMPACT=MODERATE;STRAND=1
	rs2230926	6	138196066	0.999797	1	G	ENSG00000118503	ENST00000420009	Transcript	missense_variant	592	380	127	F/C	tTc/tGc	-	IMPACT=MODERATE;STRAND=1;FLAGS=cds_end_NF
	rs2230926	6	138196066	0.999797	1	G	ENSG00000118503	ENST00000421450	Transcript	downstream_gene_variant	-	-	-	-	-	-	IMPACT=MODIFIER;DISTANCE=3625;STRAND=1;FLAGS=cds_end_NF
	rs2230926	6	138196066	0.999797	1	G	ENSG00000118503	ENST00000433680	Transcript	downstream_gene_variant	-	-	-	-	-	-	IMPACT=MODIFIER;DISTANCE=3407;STRAND=1;FLAGS=cds_end_NF
	rs2230926	6	138196066	0.999797	1	G	ENSG00000118503	ENST00000485192	Transcript	upstream_gene_variant	-	-	-	-	-	-	IMPACT=MODIFIER;DISTANCE=909;STRAND=1
	rs3757173	6	138190154	0.849562	1	G	ENSG00000118503	ENST00000237289	Transcript	intron_variant	-	-	-	-	-	-	IMPACT=MODIFIER;STRAND=1
	rs3757173	6	138190154	0.849562	1	G	ENSG00000118503	ENST00000420009	Transcript	intron_variant	-	-	-	-	-	-	IMPACT=MODIFIER;STRAND=1;FLAGS=cds_end_NF
	rs3757173	6	138190154	0.849562	1	G	ENSG00000118503	ENST00000421450	Transcript	intron_variant	-	-	-	-	-	-	IMPACT=MODIFIER;STRAND=1;FLAGS=cds_end_NF
	rs3757173	6	138190154	0.849562	1	G	ENSG00000118503	ENST00000433680	Transcript	intron_variant	-	-	-	-	-	-	IMPACT=MODIFIER;STRAND=1;FLAGS=cds_end_NF
	rs3757173	6	138190154	0.849562	1	G	ENSG00000237499	ENST00000448942	Transcript	upstream_gene_variant	-	-	-	-	-	-	IMPACT=MODIFIER;DISTANCE=1313;STRAND=-1
	rs3757173	6	138190154	0.849562	1	G	ENSG00000237499	ENST00000606998	Transcript	upstream_gene_variant	-	-	-	-	-	-	IMPACT=MODIFIER;DISTANCE=784;STRAND=-1
	rs3757173	6	138190154	0.849562	1	G	ENSG00000237499	ENST00000607671	Transcript	upstream_gene_variant	-	-	-	-	-	-	IMPACT=MODIFIER;DISTANCE=1313;STRAND=-1
	rs3834310	6	138199055	0.999275	0.99971	-	ENSG00000118503	ENST00000237289	Transcript	intron_variant	-	-	-	-	-	-	IMPACT=MODIFIER;STRAND=1
	rs3834310	6	138199055	0.999275	0.99971	-	ENSG00000118503	ENST00000420009	Transcript	downstream_gene_variant	-	-	-	-	-	-	IMPACT=MODIFIER;DISTANCE=2884;STRAND=1;FLAGS=cds_end_NF
	rs3834310	6	138199055	0.999275	0.99971	-	ENSG00000118503	ENST00000485192	Transcript	intron_variant,non_coding_transcript_variant	-	-	-	-	-	-	IMPACT=MODIFIER;STRAND=1
	rs5029926	6	138189515	0.849562	1	G	ENSG00000118503	ENST00000237289	Transcript	intron_variant	-	-	-	-	-	-	IMPACT=MODIFIER;STRAND=1
	rs5029926	6	138189515	0.849562	1	G	ENSG00000118503	ENST00000420009	Transcript	intron_variant	-	-	-	-	-	-	IMPACT=MODIFIER;STRAND=1;FLAGS=cds_end_NF
	rs5029926	6	138189515	0.849562	1	G	ENSG00000118503	ENST00000421450	Transcript	intron_variant	-	-	-	-	-	-	IMPACT=MODIFIER;STRAND=1;FLAGS=cds_end_NF
	rs5029926	6	138189515	0.849562	1	G	ENSG00000118503	ENST00000433680	Transcript	intron_variant	-	-	-	-	-	-	IMPACT=MODIFIER;STRAND=1;FLAGS=cds_end_NF
	rs5029926	6	138189515	0.849562	1	G	ENSG00000237499	ENST00000448942	Transcript	upstream_gene_variant	-	-	-	-	-	-	IMPACT=MODIFIER;DISTANCE=674;STRAND=-1
	rs5029926	6	138189515	0.849562	1	G	ENSG00000237499	ENST00000606998	Transcript	upstream_gene_variant	-	-	-	-	-	-	IMPACT=MODIFIER;DISTANCE=145;STRAND=-1
	rs5029926	6	138189515	0.849562	1	G	ENSG00000237499	ENST00000607671	Transcript	upstream_gene_variant	-	-	-	-	-	-	IMPACT=MODIFIER;DISTANCE=674;STRAND=-1
	rs5029928	6	138189942	0.849562	1	T	ENSG00000118503	ENST00000237289	Transcript	intron_variant	-	-	-	-	-	-	IMPACT=MODIFIER;STRAND=1
	rs5029928	6	138189942	0.849562	1	T	ENSG00000118503	ENST00000420009	Transcript	intron_variant	-	-	-	-	-	-	IMPACT=MODIFIER;STRAND=1;FLAGS=cds_end_NF
	rs5029928	6	138189942	0.849562	1	T	ENSG00000118503	ENST00000421450	Transcript	intron_variant	-	-	-	-	-	-	IMPACT=MODIFIER;STRAND=1;FLAGS=cds_end_NF
	rs5029928	6	138189942	0.849562	1	T	ENSG00000118503	ENST00000433680	Transcript	intron_variant	-	-	-	-	-	-	IMPACT=MODIFIER;STRAND=1;FLAGS=cds_end_NF
	rs5029928	6	138189942	0.849562	1	T	ENSG00000237499	ENST00000448942	Transcript	upstream_gene_variant	-	-	-	-	-	-	IMPACT=MODIFIER;DISTANCE=1101;STRAND=-1
	rs5029928	6	138189942	0.849562	1	T	ENSG00000237499	ENST00000606998	Transcript	upstream_gene_variant	-	-	-	-	-	-	IMPACT=MODIFIER;DISTANCE=572;STRAND=-1
	rs5029928	6	138189942	0.849562	1	T	ENSG00000237499	ENST00000607671	Transcript	upstream_gene_variant	-	-	-	-	-	-	IMPACT=MODIFIER;DISTANCE=1101;STRAND=-1
	rs5029930	6	138190684	0.849554	1	C	ENSG00000118503	ENST00000237289	Transcript	intron_variant	-	-	-	-	-	-	IMPACT=MODIFIER;STRAND=1
	rs5029930	6	138190684	0.849554	1	C	ENSG00000118503	ENST00000420009	Transcript	intron_variant	-	-	-	-	-	-	IMPACT=MODIFIER;STRAND=1;FLAGS=cds_end_NF
	rs5029930	6	138190684	0.849554	1	C	ENSG00000118503	ENST00000421450	Transcript	intron_variant	-	-	-	-	-	-	IMPACT=MODIFIER;STRAND=1;FLAGS=cds_end_NF
	rs5029930	6	138190684	0.849554	1	C	ENSG00000118503	ENST00000433680	Transcript	intron_variant	-	-	-	-	-	-	IMPACT=MODIFIER;STRAND=1;FLAGS=cds_end_NF
	rs5029930	6	138190684	0.849554	1	C	ENSG00000237499	ENST00000448942	Transcript	upstream_gene_variant	-	-	-	-	-	-	IMPACT=MODIFIER;DISTANCE=1843;STRAND=-1
	rs5029930	6	138190684	0.849554	1	C	ENSG00000237499	ENST00000606998	Transcript	upstream_gene_variant	-	-	-	-	-	-	IMPACT=MODIFIER;DISTANCE=1314;STRAND=-1
	rs5029930	6	138190684	0.849554	1	C	ENSG00000237499	ENST00000607671	Transcript	upstream_gene_variant	-	-	-	-	-	-	IMPACT=MODIFIER;DISTANCE=1843;STRAND=-1
	rs5029937	6	138195151	1	1	T	ENSG00000118503	ENST00000237289	Transcript	intron_variant	-	-	-	-	-	-	IMPACT=MODIFIER;STRAND=1
	rs5029937	6	138195151	1	1	T	ENSG00000118503	ENST00000420009	Transcript	intron_variant	-	-	-	-	-	-	IMPACT=MODIFIER;STRAND=1;FLAGS=cds_end_NF
	rs5029937	6	138195151	1	1	T	ENSG00000118503	ENST00000421450	Transcript	downstream_gene_variant	-	-	-	-	-	-	IMPACT=MODIFIER;DISTANCE=2710;STRAND=1;FLAGS=cds_end_NF
	rs5029937	6	138195151	1	1	T	ENSG00000118503	ENST00000433680	Transcript	downstream_gene_variant	-	-	-	-	-	-	IMPACT=MODIFIER;DISTANCE=2492;STRAND=1;FLAGS=cds_end_NF
	rs5029937	6	138195151	1	1	T	ENSG00000118503	ENST00000485192	Transcript	upstream_gene_variant	-	-	-	-	-	-	IMPACT=MODIFIER;DISTANCE=1824;STRAND=1
	rs5029939	6	138195723	0.999797	1	G	ENSG00000118503	ENST00000237289	Transcript	intron_variant	-	-	-	-	-	-	IMPACT=MODIFIER;STRAND=1
	rs5029939	6	138195723	0.999797	1	G	ENSG00000118503	ENST00000420009	Transcript	intron_variant	-	-	-	-	-	-	IMPACT=MODIFIER;STRAND=1;FLAGS=cds_end_NF
	rs5029939	6	138195723	0.999797	1	G	ENSG00000118503	ENST00000421450	Transcript	downstream_gene_variant	-	-	-	-	-	-	IMPACT=MODIFIER;DISTANCE=3282;STRAND=1;FLAGS=cds_end_NF
	rs5029939	6	138195723	0.999797	1	G	ENSG00000118503	ENST00000433680	Transcript	downstream_gene_variant	-	-	-	-	-	-	IMPACT=MODIFIER;DISTANCE=3064;STRAND=1;FLAGS=cds_end_NF
	rs5029939	6	138195723	0.999797	1	G	ENSG00000118503	ENST00000485192	Transcript	upstream_gene_variant	-	-	-	-	-	-	IMPACT=MODIFIER;DISTANCE=1252;STRAND=1
	rs5029949	6	138197506	1	1	G	ENSG00000118503	ENST00000237289	Transcript	intron_variant	-	-	-	-	-	-	IMPACT=MODIFIER;STRAND=1
	rs5029949	6	138197506	1	1	G	ENSG00000118503	ENST00000420009	Transcript	downstream_gene_variant	-	-	-	-	-	-	IMPACT=MODIFIER;DISTANCE=1334;STRAND=1;FLAGS=cds_end_NF
	rs5029949	6	138197506	1	1	G	ENSG00000118503	ENST00000433680	Transcript	downstream_gene_variant	-	-	-	-	-	-	IMPACT=MODIFIER;DISTANCE=4847;STRAND=1;FLAGS=cds_end_NF
	rs5029949	6	138197506	1	1	G	ENSG00000118503	ENST00000485192	Transcript	intron_variant,non_coding_transcript_variant	-	-	-	-	-	-	IMPACT=MODIFIER;STRAND=1
	rs545842829	6	138170589	0.925026	0.992522	NA	NA	NA	NA	NA	NA	NA	NA	NA	NA	NA	NA
	rs57087937	6	138190529	0.835793	0.997182	NA	NA	NA	NA	NA	NA	NA	NA	NA	NA	NA	NA
	rs58721818	6	138243739	0.841896	0.999282	T	-	-	-	intergenic_variant	-	-	-	-	-	-	IMPACT=MODIFIER
	rs59693083	6	138186532	0.849546	1	G	ENSG00000118503	ENST00000237289	Transcript	upstream_gene_variant	-	-	-	-	-	-	IMPACT=MODIFIER;DISTANCE=2049;STRAND=1
	rs59693083	6	138186532	0.849546	1	G	ENSG00000118503	ENST00000420009	Transcript	upstream_gene_variant	-	-	-	-	-	-	IMPACT=MODIFIER;DISTANCE=1927;STRAND=1;FLAGS=cds_end_NF
	rs59693083	6	138186532	0.849546	1	G	ENSG00000118503	ENST00000421450	Transcript	upstream_gene_variant	-	-	-	-	-	-	IMPACT=MODIFIER;DISTANCE=1819;STRAND=1;FLAGS=cds_end_NF
	rs59693083	6	138186532	0.849546	1	G	ENSG00000118503	ENST00000433680	Transcript	upstream_gene_variant	-	-	-	-	-	-	IMPACT=MODIFIER;DISTANCE=2187;STRAND=1;FLAGS=cds_end_NF
	rs59693083	6	138186532	0.849546	1	G	ENSG00000237499	ENST00000431144	Transcript	upstream_gene_variant	-	-	-	-	-	-	IMPACT=MODIFIER;DISTANCE=3904;STRAND=-1
	rs59693083	6	138186532	0.849546	1	G	ENSG00000237499	ENST00000448942	Transcript	intron_variant,non_coding_transcript_variant	-	-	-	-	-	-	IMPACT=MODIFIER;STRAND=-1
	rs59693083	6	138186532	0.849546	1	G	ENSG00000237499	ENST00000606998	Transcript	intron_variant,non_coding_transcript_variant	-	-	-	-	-	-	IMPACT=MODIFIER;STRAND=-1
	rs59693083	6	138186532	0.849546	1	G	ENSG00000237499	ENST00000607671	Transcript	intron_variant,non_coding_transcript_variant	-	-	-	-	-	-	IMPACT=MODIFIER;STRAND=-1
	rs59699063	6	138185881	0.849795	1	T	ENSG00000118503	ENST00000237289	Transcript	upstream_gene_variant	-	-	-	-	-	-	IMPACT=MODIFIER;DISTANCE=2700;STRAND=1
	rs59699063	6	138185881	0.849795	1	T	ENSG00000118503	ENST00000420009	Transcript	upstream_gene_variant	-	-	-	-	-	-	IMPACT=MODIFIER;DISTANCE=2578;STRAND=1;FLAGS=cds_end_NF
	rs59699063	6	138185881	0.849795	1	T	ENSG00000118503	ENST00000421450	Transcript	upstream_gene_variant	-	-	-	-	-	-	IMPACT=MODIFIER;DISTANCE=2470;STRAND=1;FLAGS=cds_end_NF
	rs59699063	6	138185881	0.849795	1	T	ENSG00000118503	ENST00000433680	Transcript	upstream_gene_variant	-	-	-	-	-	-	IMPACT=MODIFIER;DISTANCE=2838;STRAND=1;FLAGS=cds_end_NF
	rs59699063	6	138185881	0.849795	1	T	ENSG00000237499	ENST00000431144	Transcript	upstream_gene_variant	-	-	-	-	-	-	IMPACT=MODIFIER;DISTANCE=3253;STRAND=-1
	rs59699063	6	138185881	0.849795	1	T	ENSG00000237499	ENST00000448942	Transcript	intron_variant,non_coding_transcript_variant	-	-	-	-	-	-	IMPACT=MODIFIER;STRAND=-1
	rs59699063	6	138185881	0.849795	1	T	ENSG00000237499	ENST00000606998	Transcript	intron_variant,non_coding_transcript_variant	-	-	-	-	-	-	IMPACT=MODIFIER;STRAND=-1
	rs59699063	6	138185881	0.849795	1	T	ENSG00000237499	ENST00000607671	Transcript	intron_variant,non_coding_transcript_variant	-	-	-	-	-	-	IMPACT=MODIFIER;STRAND=-1
	rs60022938	6	138170589	0.925026	0.992522	NA	NA	NA	NA	NA	NA	NA	NA	NA	NA	NA	NA
	rs61117627	6	138243700	0.840455	0.999282	A	-	-	-	intergenic_variant	-	-	-	-	-	-	IMPACT=MODIFIER
	rs61593413	6	138185932	0.849652	1	A	ENSG00000118503	ENST00000237289	Transcript	upstream_gene_variant	-	-	-	-	-	-	IMPACT=MODIFIER;DISTANCE=2649;STRAND=1
	rs61593413	6	138185932	0.849652	1	A	ENSG00000118503	ENST00000420009	Transcript	upstream_gene_variant	-	-	-	-	-	-	IMPACT=MODIFIER;DISTANCE=2527;STRAND=1;FLAGS=cds_end_NF
	rs61593413	6	138185932	0.849652	1	A	ENSG00000118503	ENST00000421450	Transcript	upstream_gene_variant	-	-	-	-	-	-	IMPACT=MODIFIER;DISTANCE=2419;STRAND=1;FLAGS=cds_end_NF
	rs61593413	6	138185932	0.849652	1	A	ENSG00000118503	ENST00000433680	Transcript	upstream_gene_variant	-	-	-	-	-	-	IMPACT=MODIFIER;DISTANCE=2787;STRAND=1;FLAGS=cds_end_NF
	rs61593413	6	138185932	0.849652	1	A	ENSG00000237499	ENST00000431144	Transcript	upstream_gene_variant	-	-	-	-	-	-	IMPACT=MODIFIER;DISTANCE=3304;STRAND=-1
	rs61593413	6	138185932	0.849652	1	A	ENSG00000237499	ENST00000448942	Transcript	intron_variant,non_coding_transcript_variant	-	-	-	-	-	-	IMPACT=MODIFIER;STRAND=-1
	rs61593413	6	138185932	0.849652	1	A	ENSG00000237499	ENST00000606998	Transcript	intron_variant,non_coding_transcript_variant	-	-	-	-	-	-	IMPACT=MODIFIER;STRAND=-1
	rs61593413	6	138185932	0.849652	1	A	ENSG00000237499	ENST00000607671	Transcript	intron_variant,non_coding_transcript_variant	-	-	-	-	-	-	IMPACT=MODIFIER;STRAND=-1
	rs6570194	6	138242638	0.977115	0.991169	C	-	-	-	intergenic_variant	-	-	-	-	-	-	IMPACT=MODIFIER
	rs6932056	6	138242437	0.982229	0.999277	C	-	-	-	intergenic_variant	-	-	-	-	-	-	IMPACT=MODIFIER
	rs719149	6	138192745	0.849704	1	A	ENSG00000118503	ENST00000237289	Transcript	intron_variant	-	-	-	-	-	-	IMPACT=MODIFIER;STRAND=1
	rs719149	6	138192745	0.849704	1	A	ENSG00000118503	ENST00000420009	Transcript	intron_variant	-	-	-	-	-	-	IMPACT=MODIFIER;STRAND=1;FLAGS=cds_end_NF
	rs719149	6	138192745	0.849704	1	A	ENSG00000118503	ENST00000421450	Transcript	downstream_gene_variant	-	-	-	-	-	-	IMPACT=MODIFIER;DISTANCE=304;STRAND=1;FLAGS=cds_end_NF
	rs719149	6	138192745	0.849704	1	A	ENSG00000118503	ENST00000433680	Transcript	downstream_gene_variant	-	-	-	-	-	-	IMPACT=MODIFIER;DISTANCE=86;STRAND=1;FLAGS=cds_end_NF
	rs719149	6	138192745	0.849704	1	A	ENSG00000118503	ENST00000485192	Transcript	upstream_gene_variant	-	-	-	-	-	-	IMPACT=MODIFIER;DISTANCE=4230;STRAND=1
	rs719149	6	138192745	0.849704	1	A	ENSG00000237499	ENST00000448942	Transcript	upstream_gene_variant	-	-	-	-	-	-	IMPACT=MODIFIER;DISTANCE=3904;STRAND=-1
	rs719149	6	138192745	0.849704	1	A	ENSG00000237499	ENST00000606998	Transcript	upstream_gene_variant	-	-	-	-	-	-	IMPACT=MODIFIER;DISTANCE=3375;STRAND=-1
	rs719149	6	138192745	0.849704	1	A	ENSG00000237499	ENST00000607671	Transcript	upstream_gene_variant	-	-	-	-	-	-	IMPACT=MODIFIER;DISTANCE=3904;STRAND=-1
	rs719150	6	138192761	0.839599	1	G	ENSG00000118503	ENST00000237289	Transcript	intron_variant	-	-	-	-	-	-	IMPACT=MODIFIER;STRAND=1
	rs719150	6	138192761	0.839599	1	G	ENSG00000118503	ENST00000420009	Transcript	intron_variant	-	-	-	-	-	-	IMPACT=MODIFIER;STRAND=1;FLAGS=cds_end_NF
	rs719150	6	138192761	0.839599	1	G	ENSG00000118503	ENST00000421450	Transcript	downstream_gene_variant	-	-	-	-	-	-	IMPACT=MODIFIER;DISTANCE=320;STRAND=1;FLAGS=cds_end_NF
	rs719150	6	138192761	0.839599	1	G	ENSG00000118503	ENST00000433680	Transcript	downstream_gene_variant	-	-	-	-	-	-	IMPACT=MODIFIER;DISTANCE=102;STRAND=1;FLAGS=cds_end_NF
	rs719150	6	138192761	0.839599	1	G	ENSG00000118503	ENST00000485192	Transcript	upstream_gene_variant	-	-	-	-	-	-	IMPACT=MODIFIER;DISTANCE=4214;STRAND=1
	rs719150	6	138192761	0.839599	1	G	ENSG00000237499	ENST00000448942	Transcript	upstream_gene_variant	-	-	-	-	-	-	IMPACT=MODIFIER;DISTANCE=3920;STRAND=-1
	rs719150	6	138192761	0.839599	1	G	ENSG00000237499	ENST00000606998	Transcript	upstream_gene_variant	-	-	-	-	-	-	IMPACT=MODIFIER;DISTANCE=3391;STRAND=-1
	rs719150	6	138192761	0.839599	1	G	ENSG00000237499	ENST00000607671	Transcript	upstream_gene_variant	-	-	-	-	-	-	IMPACT=MODIFIER;DISTANCE=3920;STRAND=-1
	rs77000060	6	138237989	0.989597	0.999522	T	-	-	-	intergenic_variant	-	-	-	-	-	-	IMPACT=MODIFIER
	rs7749323	6	138230389	0.99363	0.998933	A	-	-	-	intergenic_variant	-	-	-	-	-	-	IMPACT=MODIFIER
	rs7750604	6	138190533	0.835737	0.99721	NA	NA	NA	NA	NA	NA	NA	NA	NA	NA	NA	NA
	rs7752903	6	138227364	0.99363	0.998933	G	-	-	-	intergenic_variant	-	-	-	-	-	-	IMPACT=MODIFIER
	rs7774101	6	138182492	0.8496	1	G	ENSG00000237499	ENST00000431144	Transcript	non_coding_transcript_exon_variant	137	-	-	-	-	-	IMPACT=MODIFIER;STRAND=-1
	rs7774101	6	138182492	0.8496	1	G	ENSG00000237499	ENST00000448942	Transcript	intron_variant,non_coding_transcript_variant	-	-	-	-	-	-	IMPACT=MODIFIER;STRAND=-1
	rs7774101	6	138182492	0.8496	1	G	ENSG00000237499	ENST00000606327	Transcript	upstream_gene_variant	-	-	-	-	-	-	IMPACT=MODIFIER;DISTANCE=3307;STRAND=-1
	rs7774101	6	138182492	0.8496	1	G	ENSG00000237499	ENST00000606998	Transcript	intron_variant,non_coding_transcript_variant	-	-	-	-	-	-	IMPACT=MODIFIER;STRAND=-1
	rs7774101	6	138182492	0.8496	1	G	ENSG00000237499	ENST00000607671	Transcript	intron_variant,non_coding_transcript_variant	-	-	-	-	-	-	IMPACT=MODIFIER;STRAND=-1
	rs80213143	6	138157728	0.903098	0.989987	C	ENSG00000237499	ENST00000606998	Transcript	intron_variant,non_coding_transcript_variant	-	-	-	-	-	-	IMPACT=MODIFIER;STRAND=-1
	rs9494885	6	138172748	0.851569	0.999653	C	ENSG00000237499	ENST00000606327	Transcript	downstream_gene_variant	-	-	-	-	-	-	IMPACT=MODIFIER;DISTANCE=3251;STRAND=-1
	rs9494885	6	138172748	0.851569	0.999653	C	ENSG00000237499	ENST00000606998	Transcript	intron_variant,non_coding_transcript_variant	-	-	-	-	-	-	IMPACT=MODIFIER;STRAND=-1
	rs9494892	6	138223489	0.998536	0.999512	T	-	-	-	intergenic_variant	-	-	-	-	-	-	IMPACT=MODIFIER
	rs9494893	6	138223490	0.998537	0.999512	T	-	-	-	intergenic_variant	-	-	-	-	-	-	IMPACT=MODIFIER
	rs9494894	6	138228520	0.993507	0.998738	C	-	-	-	intergenic_variant	-	-	-	-	-	-	IMPACT=MODIFIER
	rs9494895	6	138234778	0.991666	0.996908	T	-	-	-	intergenic_variant	-	-	-	-	-	-	IMPACT=MODIFIER
	rs1022745994	7	128577914	0.996871	1	NA	NA	NA	NA	NA	NA	NA	NA	NA	NA	NA	NA
	rs11269962	7	128575797	1	1	NA	NA	NA	NA	NA	NA	NA	NA	NA	NA	NA	NA
	rs1167352630	7	128577914	0.996871	1	NA	NA	NA	NA	NA	NA	NA	NA	NA	NA	NA	NA
	rs1422224269	7	128577914	0.996871	1	NA	NA	NA	NA	NA	NA	NA	NA	NA	NA	NA	NA
	rs142738614	7	128577914	0.996871	1	NA	NA	NA	NA	NA	NA	NA	NA	NA	NA	NA	NA
	rs3757387	7	128576086	1	1	C	ENSG00000128604	ENST00000249375	Transcript	upstream_gene_variant	-	-	-	-	-	-	IMPACT=MODIFIER;DISTANCE=2185;STRAND=1
	rs3757387	7	128576086	1	1	C	ENSG00000128604	ENST00000357234	Transcript	upstream_gene_variant	-	-	-	-	-	-	IMPACT=MODIFIER;DISTANCE=1908;STRAND=1
	rs3757387	7	128576086	1	1	C	ENSG00000128604	ENST00000402030	Transcript	upstream_gene_variant	-	-	-	-	-	-	IMPACT=MODIFIER;DISTANCE=1957;STRAND=1
	rs3757387	7	128576086	1	1	C	ENSG00000128604	ENST00000461416	Transcript	upstream_gene_variant	-	-	-	-	-	-	IMPACT=MODIFIER;DISTANCE=1949;STRAND=1
	rs3757387	7	128576086	1	1	C	ENSG00000128604	ENST00000464557	Transcript	upstream_gene_variant	-	-	-	-	-	-	IMPACT=MODIFIER;DISTANCE=1940;STRAND=1;FLAGS=cds_end_NF
	rs3757387	7	128576086	1	1	C	ENSG00000128604	ENST00000465603	Transcript	upstream_gene_variant	-	-	-	-	-	-	IMPACT=MODIFIER;DISTANCE=4806;STRAND=1
	rs3757387	7	128576086	1	1	C	ENSG00000128604	ENST00000467002	Transcript	upstream_gene_variant	-	-	-	-	-	-	IMPACT=MODIFIER;DISTANCE=4174;STRAND=1;FLAGS=cds_end_NF
	rs3757387	7	128576086	1	1	C	ENSG00000128604	ENST00000473745	Transcript	upstream_gene_variant	-	-	-	-	-	-	IMPACT=MODIFIER;DISTANCE=4640;STRAND=1
	rs3757387	7	128576086	1	1	C	ENSG00000128604	ENST00000473787	Transcript	upstream_gene_variant	-	-	-	-	-	-	IMPACT=MODIFIER;DISTANCE=1959;STRAND=1
	rs3757387	7	128576086	1	1	C	ENSG00000128604	ENST00000477535	Transcript	upstream_gene_variant	-	-	-	-	-	-	IMPACT=MODIFIER;DISTANCE=1908;STRAND=1
	rs3757387	7	128576086	1	1	C	ENSG00000128604	ENST00000479582	Transcript	upstream_gene_variant	-	-	-	-	-	-	IMPACT=MODIFIER;DISTANCE=1930;STRAND=1;FLAGS=cds_end_NF
	rs3757387	7	128576086	1	1	C	ENSG00000128604	ENST00000488569	Transcript	upstream_gene_variant	-	-	-	-	-	-	IMPACT=MODIFIER;DISTANCE=1905;STRAND=1
	rs3757387	7	128576086	1	1	C	ENSG00000128604	ENST00000489702	Transcript	upstream_gene_variant	-	-	-	-	-	-	IMPACT=MODIFIER;DISTANCE=1580;STRAND=1;FLAGS=cds_end_NF
	rs4728142	7	128573967	0.971983	1	A	ENSG00000128604	ENST00000249375	Transcript	upstream_gene_variant	-	-	-	-	-	-	IMPACT=MODIFIER;DISTANCE=4304;STRAND=1
	rs4728142	7	128573967	0.971983	1	A	ENSG00000128604	ENST00000357234	Transcript	upstream_gene_variant	-	-	-	-	-	-	IMPACT=MODIFIER;DISTANCE=4027;STRAND=1
	rs4728142	7	128573967	0.971983	1	A	ENSG00000128604	ENST00000402030	Transcript	upstream_gene_variant	-	-	-	-	-	-	IMPACT=MODIFIER;DISTANCE=4076;STRAND=1
	rs4728142	7	128573967	0.971983	1	A	ENSG00000128604	ENST00000461416	Transcript	upstream_gene_variant	-	-	-	-	-	-	IMPACT=MODIFIER;DISTANCE=4068;STRAND=1
	rs4728142	7	128573967	0.971983	1	A	ENSG00000128604	ENST00000464557	Transcript	upstream_gene_variant	-	-	-	-	-	-	IMPACT=MODIFIER;DISTANCE=4059;STRAND=1;FLAGS=cds_end_NF
	rs4728142	7	128573967	0.971983	1	A	ENSG00000128604	ENST00000473787	Transcript	upstream_gene_variant	-	-	-	-	-	-	IMPACT=MODIFIER;DISTANCE=4078;STRAND=1
	rs4728142	7	128573967	0.971983	1	A	ENSG00000128604	ENST00000477535	Transcript	upstream_gene_variant	-	-	-	-	-	-	IMPACT=MODIFIER;DISTANCE=4027;STRAND=1
	rs4728142	7	128573967	0.971983	1	A	ENSG00000128604	ENST00000479582	Transcript	upstream_gene_variant	-	-	-	-	-	-	IMPACT=MODIFIER;DISTANCE=4049;STRAND=1;FLAGS=cds_end_NF
	rs4728142	7	128573967	0.971983	1	A	ENSG00000128604	ENST00000488569	Transcript	upstream_gene_variant	-	-	-	-	-	-	IMPACT=MODIFIER;DISTANCE=4024;STRAND=1
	rs4728142	7	128573967	0.971983	1	A	ENSG00000128604	ENST00000489702	Transcript	upstream_gene_variant	-	-	-	-	-	-	IMPACT=MODIFIER;DISTANCE=3699;STRAND=1;FLAGS=cds_end_NF
	rs764071296	7	128575797	1	1	NA	NA	NA	NA	NA	NA	NA	NA	NA	NA	NA	NA
	rs10083374	14	105402994	1	1	C	ENSG00000166428	ENST00000392593	Transcript	downstream_gene_variant	-	-	-	-	-	-	IMPACT=MODIFIER;DISTANCE=3421;STRAND=1
	rs10083374	14	105402994	1	1	C	ENSG00000166428	ENST00000472702	Transcript	downstream_gene_variant	-	-	-	-	-	-	IMPACT=MODIFIER;DISTANCE=4480;STRAND=1
	rs10083374	14	105402994	1	1	C	ENSG00000166428	ENST00000540372	Transcript	downstream_gene_variant	-	-	-	-	-	-	IMPACT=MODIFIER;DISTANCE=3420;STRAND=1
	rs10083374	14	105402994	1	1	C	ENSG00000166428	ENST00000553861	Transcript	downstream_gene_variant	-	-	-	-	-	-	IMPACT=MODIFIER;DISTANCE=3422;STRAND=1
	rs10083374	14	105402994	1	1	C	ENSG00000185567	ENST00000333244	Transcript	downstream_gene_variant	-	-	-	-	-	-	IMPACT=MODIFIER;DISTANCE=660;STRAND=-1
	rs10083374	14	105402994	1	1	C	ENSG00000185567	ENST00000555122	Transcript	downstream_gene_variant	-	-	-	-	-	-	IMPACT=MODIFIER;DISTANCE=587;STRAND=-1
	rs10083374	14	105402994	1	1	C	ENSG00000185567	ENST00000557457	Transcript	downstream_gene_variant	-	-	-	-	-	-	IMPACT=MODIFIER;DISTANCE=596;STRAND=-1
	rs10083490	14	105402418	1	1	T	ENSG00000166428	ENST00000392593	Transcript	downstream_gene_variant	-	-	-	-	-	-	IMPACT=MODIFIER;DISTANCE=2845;STRAND=1
	rs10083490	14	105402418	1	1	T	ENSG00000166428	ENST00000472702	Transcript	downstream_gene_variant	-	-	-	-	-	-	IMPACT=MODIFIER;DISTANCE=3904;STRAND=1
	rs10083490	14	105402418	1	1	T	ENSG00000166428	ENST00000540372	Transcript	downstream_gene_variant	-	-	-	-	-	-	IMPACT=MODIFIER;DISTANCE=2844;STRAND=1
	rs10083490	14	105402418	1	1	T	ENSG00000166428	ENST00000553861	Transcript	downstream_gene_variant	-	-	-	-	-	-	IMPACT=MODIFIER;DISTANCE=2846;STRAND=1
	rs10083490	14	105402418	1	1	T	ENSG00000185567	ENST00000333244	Transcript	downstream_gene_variant	-	-	-	-	-	-	IMPACT=MODIFIER;DISTANCE=1236;STRAND=-1
	rs10083490	14	105402418	1	1	T	ENSG00000185567	ENST00000555122	Transcript	downstream_gene_variant	-	-	-	-	-	-	IMPACT=MODIFIER;DISTANCE=1163;STRAND=-1
	rs10083490	14	105402418	1	1	T	ENSG00000185567	ENST00000557457	Transcript	downstream_gene_variant	-	-	-	-	-	-	IMPACT=MODIFIER;DISTANCE=1172;STRAND=-1
	rs10083496	14	105402786	1	1	A	ENSG00000166428	ENST00000392593	Transcript	downstream_gene_variant	-	-	-	-	-	-	IMPACT=MODIFIER;DISTANCE=3213;STRAND=1
	rs10083496	14	105402786	1	1	A	ENSG00000166428	ENST00000472702	Transcript	downstream_gene_variant	-	-	-	-	-	-	IMPACT=MODIFIER;DISTANCE=4272;STRAND=1
	rs10083496	14	105402786	1	1	A	ENSG00000166428	ENST00000540372	Transcript	downstream_gene_variant	-	-	-	-	-	-	IMPACT=MODIFIER;DISTANCE=3212;STRAND=1
	rs10083496	14	105402786	1	1	A	ENSG00000166428	ENST00000553861	Transcript	downstream_gene_variant	-	-	-	-	-	-	IMPACT=MODIFIER;DISTANCE=3214;STRAND=1
	rs10083496	14	105402786	1	1	A	ENSG00000185567	ENST00000333244	Transcript	downstream_gene_variant	-	-	-	-	-	-	IMPACT=MODIFIER;DISTANCE=868;STRAND=-1
	rs10083496	14	105402786	1	1	A	ENSG00000185567	ENST00000555122	Transcript	downstream_gene_variant	-	-	-	-	-	-	IMPACT=MODIFIER;DISTANCE=795;STRAND=-1
	rs10083496	14	105402786	1	1	A	ENSG00000185567	ENST00000557457	Transcript	downstream_gene_variant	-	-	-	-	-	-	IMPACT=MODIFIER;DISTANCE=804;STRAND=-1
	rs10145032	14	105414810	0.980982	1	G	ENSG00000185567	ENST00000333244	Transcript	synonymous_variant	7098	6978	2326	L	ctG/ctC	-	IMPACT=LOW;STRAND=-1
	rs10145032	14	105414810	0.980982	1	G	ENSG00000185567	ENST00000555122	Transcript	non_coding_transcript_exon_variant	7106	-	-	-	-	-	IMPACT=MODIFIER;STRAND=-1
	rs10145032	14	105414810	0.980982	1	G	ENSG00000185567	ENST00000557457	Transcript	intron_variant	-	-	-	-	-	-	IMPACT=MODIFIER;STRAND=-1
	rs10149193	14	105403474	1	1	T	ENSG00000166428	ENST00000392593	Transcript	downstream_gene_variant	-	-	-	-	-	-	IMPACT=MODIFIER;DISTANCE=3901;STRAND=1
	rs10149193	14	105403474	1	1	T	ENSG00000166428	ENST00000472702	Transcript	downstream_gene_variant	-	-	-	-	-	-	IMPACT=MODIFIER;DISTANCE=4960;STRAND=1
	rs10149193	14	105403474	1	1	T	ENSG00000166428	ENST00000540372	Transcript	downstream_gene_variant	-	-	-	-	-	-	IMPACT=MODIFIER;DISTANCE=3900;STRAND=1
	rs10149193	14	105403474	1	1	T	ENSG00000166428	ENST00000553861	Transcript	downstream_gene_variant	-	-	-	-	-	-	IMPACT=MODIFIER;DISTANCE=3902;STRAND=1
	rs10149193	14	105403474	1	1	T	ENSG00000185567	ENST00000333244	Transcript	downstream_gene_variant	-	-	-	-	-	-	IMPACT=MODIFIER;DISTANCE=180;STRAND=-1
	rs10149193	14	105403474	1	1	T	ENSG00000185567	ENST00000555122	Transcript	downstream_gene_variant	-	-	-	-	-	-	IMPACT=MODIFIER;DISTANCE=107;STRAND=-1
	rs10149193	14	105403474	1	1	T	ENSG00000185567	ENST00000557457	Transcript	downstream_gene_variant	-	-	-	-	-	-	IMPACT=MODIFIER;DISTANCE=116;STRAND=-1
	rs10152073	14	105409959	1	1	T	ENSG00000185567	ENST00000333244	Transcript	synonymous_variant	11949	11829	3943	A	gcC/gcA	-	IMPACT=LOW;STRAND=-1
	rs10152073	14	105409959	1	1	T	ENSG00000185567	ENST00000555122	Transcript	non_coding_transcript_exon_variant	11957	-	-	-	-	-	IMPACT=MODIFIER;STRAND=-1
	rs10152073	14	105409959	1	1	T	ENSG00000185567	ENST00000557457	Transcript	intron_variant	-	-	-	-	-	-	IMPACT=MODIFIER;STRAND=-1
	rs1036713	14	105396693	0.994243	0.998076	C	ENSG00000166428	ENST00000392593	Transcript	intron_variant	-	-	-	-	-	-	IMPACT=MODIFIER;STRAND=1
	rs1036713	14	105396693	0.994243	0.998076	C	ENSG00000166428	ENST00000472702	Transcript	upstream_gene_variant	-	-	-	-	-	-	IMPACT=MODIFIER;DISTANCE=265;STRAND=1
	rs1036713	14	105396693	0.994243	0.998076	C	ENSG00000166428	ENST00000472901	Transcript	downstream_gene_variant	-	-	-	-	-	-	IMPACT=MODIFIER;DISTANCE=1312;STRAND=1
	rs1036713	14	105396693	0.994243	0.998076	C	ENSG00000166428	ENST00000540372	Transcript	intron_variant	-	-	-	-	-	-	IMPACT=MODIFIER;STRAND=1
	rs1036713	14	105396693	0.994243	0.998076	C	ENSG00000166428	ENST00000553861	Transcript	upstream_gene_variant	-	-	-	-	-	-	IMPACT=MODIFIER;DISTANCE=1804;STRAND=1
	rs1036713	14	105396693	0.994243	0.998076	C	ENSG00000166428	ENST00000557573	Transcript	intron_variant	-	-	-	-	-	-	IMPACT=MODIFIER;STRAND=1;FLAGS=cds_end_NF
	rs10438246	14	105410183	1	1	C	ENSG00000185567	ENST00000333244	Transcript	missense_variant	11725	11605	3869	M/V	Atg/Gtg	-	IMPACT=MODERATE;STRAND=-1
	rs10438246	14	105410183	1	1	C	ENSG00000185567	ENST00000555122	Transcript	non_coding_transcript_exon_variant	11733	-	-	-	-	-	IMPACT=MODIFIER;STRAND=-1
	rs10438246	14	105410183	1	1	C	ENSG00000185567	ENST00000557457	Transcript	intron_variant	-	-	-	-	-	-	IMPACT=MODIFIER;STRAND=-1
	rs10438247	14	105411781	1	1	A	ENSG00000185567	ENST00000333244	Transcript	missense_variant	10127	10007	3336	P/L	cCg/cTg	-	IMPACT=MODERATE;STRAND=-1
	rs10438247	14	105411781	1	1	A	ENSG00000185567	ENST00000555122	Transcript	non_coding_transcript_exon_variant	10135	-	-	-	-	-	IMPACT=MODIFIER;STRAND=-1
	rs10438247	14	105411781	1	1	A	ENSG00000185567	ENST00000557457	Transcript	intron_variant	-	-	-	-	-	-	IMPACT=MODIFIER;STRAND=-1
	rs1048257	14	105404384	1	1	C	ENSG00000166428	ENST00000392593	Transcript	downstream_gene_variant	-	-	-	-	-	-	IMPACT=MODIFIER;DISTANCE=4811;STRAND=1
	rs1048257	14	105404384	1	1	C	ENSG00000166428	ENST00000540372	Transcript	downstream_gene_variant	-	-	-	-	-	-	IMPACT=MODIFIER;DISTANCE=4810;STRAND=1
	rs1048257	14	105404384	1	1	C	ENSG00000166428	ENST00000553861	Transcript	downstream_gene_variant	-	-	-	-	-	-	IMPACT=MODIFIER;DISTANCE=4812;STRAND=1
	rs1048257	14	105404384	1	1	C	ENSG00000185567	ENST00000333244	Transcript	3_prime_UTR_variant	17524	-	-	-	-	-	IMPACT=MODIFIER;STRAND=-1
	rs1048257	14	105404384	1	1	C	ENSG00000185567	ENST00000555122	Transcript	non_coding_transcript_exon_variant	17532	-	-	-	-	-	IMPACT=MODIFIER;STRAND=-1
	rs1048257	14	105404384	1	1	C	ENSG00000185567	ENST00000557457	Transcript	3_prime_UTR_variant	2642	-	-	-	-	-	IMPACT=MODIFIER;STRAND=-1
	rs11160825	14	105410411	1	1	T	ENSG00000185567	ENST00000333244	Transcript	missense_variant	11497	11377	3793	D/N	Gac/Aac	-	IMPACT=MODERATE;STRAND=-1
	rs11160825	14	105410411	1	1	T	ENSG00000185567	ENST00000555122	Transcript	non_coding_transcript_exon_variant	11505	-	-	-	-	-	IMPACT=MODIFIER;STRAND=-1
	rs11160825	14	105410411	1	1	T	ENSG00000185567	ENST00000557457	Transcript	intron_variant	-	-	-	-	-	-	IMPACT=MODIFIER;STRAND=-1
	rs11623422	14	105407031	1	1	G	ENSG00000185567	ENST00000333244	Transcript	synonymous_variant	14877	14757	4919	S	tcT/tcC	-	IMPACT=LOW;STRAND=-1
	rs11623422	14	105407031	1	1	G	ENSG00000185567	ENST00000555122	Transcript	non_coding_transcript_exon_variant	14885	-	-	-	-	-	IMPACT=MODIFIER;STRAND=-1
	rs11623422	14	105407031	1	1	G	ENSG00000185567	ENST00000557457	Transcript	intron_variant	-	-	-	-	-	-	IMPACT=MODIFIER;STRAND=-1
	rs11625007	14	105418391	0.92244	0.973202	T	ENSG00000185567	ENST00000333244	Transcript	missense_variant	3517	3397	1133	V/I	Gtc/Atc	-	IMPACT=MODERATE;STRAND=-1
	rs11625007	14	105418391	0.92244	0.973202	T	ENSG00000185567	ENST00000555122	Transcript	non_coding_transcript_exon_variant	3525	-	-	-	-	-	IMPACT=MODIFIER;STRAND=-1
	rs11625007	14	105418391	0.92244	0.973202	T	ENSG00000185567	ENST00000555544	Transcript	downstream_gene_variant	-	-	-	-	-	-	IMPACT=MODIFIER;DISTANCE=1483;STRAND=-1
	rs11625007	14	105418391	0.92244	0.973202	T	ENSG00000185567	ENST00000557457	Transcript	intron_variant	-	-	-	-	-	-	IMPACT=MODIFIER;STRAND=-1
	rs11846918	14	105415469	0.866588	0.956023	NA	NA	NA	NA	NA	NA	NA	NA	NA	NA	NA	NA
	rs11850949	14	105408827	1	1	NA	NA	NA	NA	NA	NA	NA	NA	NA	NA	NA	NA
	rs11851053	14	105407208	1	1	C	ENSG00000185567	ENST00000333244	Transcript	synonymous_variant	14700	14580	4860	V	gtA/gtG	-	IMPACT=LOW;STRAND=-1
	rs11851053	14	105407208	1	1	C	ENSG00000185567	ENST00000555122	Transcript	non_coding_transcript_exon_variant	14708	-	-	-	-	-	IMPACT=MODIFIER;STRAND=-1
	rs11851053	14	105407208	1	1	C	ENSG00000185567	ENST00000557457	Transcript	splice_region_variant,intron_variant	-	-	-	-	-	-	IMPACT=LOW;STRAND=-1
	rs12433815	14	105412542	1	1	NA	NA	NA	NA	NA	NA	NA	NA	NA	NA	NA	NA
	rs12433837	14	105412541	1	1	NA	NA	NA	NA	NA	NA	NA	NA	NA	NA	NA	NA
	rs12436986	14	105412554	1	1	NA	NA	NA	NA	NA	NA	NA	NA	NA	NA	NA	NA
	rs151013711	14	105418504	0.826547	0.993411	NA	NA	NA	NA	NA	NA	NA	NA	NA	NA	NA	NA
	rs2013228	14	105417774	0.864911	0.986912	NA	NA	NA	NA	NA	NA	NA	NA	NA	NA	NA	NA
	rs2013462	14	105416959	0.845982	0.962031	NA	NA	NA	NA	NA	NA	NA	NA	NA	NA	NA	NA
	rs2248966	14	105417102	0.878567	0.980845	NA	NA	NA	NA	NA	NA	NA	NA	NA	NA	NA	NA
	rs2396457	14	105417766	0.844672	0.992876	NA	NA	NA	NA	NA	NA	NA	NA	NA	NA	NA	NA
	rs2582511	14	105416010	0.923011	0.982026	NA	NA	NA	NA	NA	NA	NA	NA	NA	NA	NA	NA
	rs2582513	14	105414790	0.97989	1	G	ENSG00000185567	ENST00000333244	Transcript	missense_variant	7118	6998	2333	L/P	cTt/cCt	-	IMPACT=MODERATE;STRAND=-1
	rs2582513	14	105414790	0.97989	1	G	ENSG00000185567	ENST00000555122	Transcript	non_coding_transcript_exon_variant	7126	-	-	-	-	-	IMPACT=MODIFIER;STRAND=-1
	rs2582513	14	105414790	0.97989	1	G	ENSG00000185567	ENST00000557457	Transcript	intron_variant	-	-	-	-	-	-	IMPACT=MODIFIER;STRAND=-1
	rs2582514	14	105413204	1	1	NA	NA	NA	NA	NA	NA	NA	NA	NA	NA	NA	NA
	rs2582533	14	105398787	0.998034	1	C	ENSG00000166428	ENST00000392593	Transcript	intron_variant	-	-	-	-	-	-	IMPACT=MODIFIER;STRAND=1
	rs2582533	14	105398787	0.998034	1	C	ENSG00000166428	ENST00000472702	Transcript	downstream_gene_variant	-	-	-	-	-	-	IMPACT=MODIFIER;DISTANCE=273;STRAND=1
	rs2582533	14	105398787	0.998034	1	C	ENSG00000166428	ENST00000472901	Transcript	downstream_gene_variant	-	-	-	-	-	-	IMPACT=MODIFIER;DISTANCE=3406;STRAND=1
	rs2582533	14	105398787	0.998034	1	C	ENSG00000166428	ENST00000540372	Transcript	intron_variant	-	-	-	-	-	-	IMPACT=MODIFIER;STRAND=1
	rs2582533	14	105398787	0.998034	1	C	ENSG00000166428	ENST00000553861	Transcript	intron_variant	-	-	-	-	-	-	IMPACT=MODIFIER;STRAND=1
	rs2582533	14	105398787	0.998034	1	C	ENSG00000166428	ENST00000557573	Transcript	downstream_gene_variant	-	-	-	-	-	-	IMPACT=MODIFIER;DISTANCE=1649;STRAND=1;FLAGS=cds_end_NF
	rs2582533	14	105398787	0.998034	1	C	ENSG00000185567	ENST00000333244	Transcript	downstream_gene_variant	-	-	-	-	-	-	IMPACT=MODIFIER;DISTANCE=4867;STRAND=-1
	rs2582533	14	105398787	0.998034	1	C	ENSG00000185567	ENST00000555122	Transcript	downstream_gene_variant	-	-	-	-	-	-	IMPACT=MODIFIER;DISTANCE=4794;STRAND=-1
	rs2582533	14	105398787	0.998034	1	C	ENSG00000185567	ENST00000557457	Transcript	downstream_gene_variant	-	-	-	-	-	-	IMPACT=MODIFIER;DISTANCE=4803;STRAND=-1
	rs2819419	14	105406238	1	1	C	ENSG00000185567	ENST00000333244	Transcript	missense_variant	15670	15550	5184	Y/D	Tac/Gac	-	IMPACT=MODERATE;STRAND=-1
	rs2819419	14	105406238	1	1	C	ENSG00000185567	ENST00000555122	Transcript	non_coding_transcript_exon_variant	15678	-	-	-	-	-	IMPACT=MODIFIER;STRAND=-1
	rs2819419	14	105406238	1	1	C	ENSG00000185567	ENST00000557457	Transcript	missense_variant	788	544	182	Y/D	Tac/Gac	-	IMPACT=MODERATE;STRAND=-1
	rs2819421	14	105408811	1	1	G	ENSG00000185567	ENST00000333244	Transcript	missense_variant	13097	12977	4326	L/P	cTg/cCg	-	IMPACT=MODERATE;STRAND=-1
	rs2819421	14	105408811	1	1	G	ENSG00000185567	ENST00000555122	Transcript	non_coding_transcript_exon_variant	13105	-	-	-	-	-	IMPACT=MODIFIER;STRAND=-1
	rs2819421	14	105408811	1	1	G	ENSG00000185567	ENST00000557457	Transcript	intron_variant	-	-	-	-	-	-	IMPACT=MODIFIER;STRAND=-1
	rs2819422	14	105408955	1	1	G	ENSG00000185567	ENST00000333244	Transcript	missense_variant	12953	12833	4278	V/A	gTg/gCg	-	IMPACT=MODERATE;STRAND=-1
	rs2819422	14	105408955	1	1	G	ENSG00000185567	ENST00000555122	Transcript	non_coding_transcript_exon_variant	12961	-	-	-	-	-	IMPACT=MODIFIER;STRAND=-1
	rs2819422	14	105408955	1	1	G	ENSG00000185567	ENST00000557457	Transcript	intron_variant	-	-	-	-	-	-	IMPACT=MODIFIER;STRAND=-1
	rs2819424	14	105410775	1	1	G	ENSG00000185567	ENST00000333244	Transcript	synonymous_variant	11133	11013	3671	D	gaT/gaC	-	IMPACT=LOW;STRAND=-1
	rs2819424	14	105410775	1	1	G	ENSG00000185567	ENST00000555122	Transcript	non_coding_transcript_exon_variant	11141	-	-	-	-	-	IMPACT=MODIFIER;STRAND=-1
	rs2819424	14	105410775	1	1	G	ENSG00000185567	ENST00000557457	Transcript	intron_variant	-	-	-	-	-	-	IMPACT=MODIFIER;STRAND=-1
	rs2819426	14	105412259	0.946572	1	NA	NA	NA	NA	NA	NA	NA	NA	NA	NA	NA	NA
	rs28380382	14	105410827	1	1	T	ENSG00000185567	ENST00000333244	Transcript	missense_variant	11081	10961	3654	G/E	gGg/gAg	-	IMPACT=MODERATE;STRAND=-1
	rs28380382	14	105410827	1	1	T	ENSG00000185567	ENST00000555122	Transcript	non_coding_transcript_exon_variant	11089	-	-	-	-	-	IMPACT=MODIFIER;STRAND=-1
	rs28380382	14	105410827	1	1	T	ENSG00000185567	ENST00000557457	Transcript	intron_variant	-	-	-	-	-	-	IMPACT=MODIFIER;STRAND=-1
	rs28454709	14	105405942	1	1	A	ENSG00000185567	ENST00000333244	Transcript	synonymous_variant	15966	15846	5282	L	ctC/ctT	-	IMPACT=LOW;STRAND=-1
	rs28454709	14	105405942	1	1	A	ENSG00000185567	ENST00000555122	Transcript	non_coding_transcript_exon_variant	15974	-	-	-	-	-	IMPACT=MODIFIER;STRAND=-1
	rs28454709	14	105405942	1	1	A	ENSG00000185567	ENST00000557457	Transcript	synonymous_variant	1084	840	280	L	ctC/ctT	-	IMPACT=LOW;STRAND=-1
	rs28600075	14	105408315	1	1	NA	NA	NA	NA	NA	NA	NA	NA	NA	NA	NA	NA
	rs3742935	14	105405599	1	1	C	ENSG00000185567	ENST00000333244	Transcript	missense_variant	16309	16189	5397	P/A	Cct/Gct	-	IMPACT=MODERATE;STRAND=-1
	rs3742935	14	105405599	1	1	C	ENSG00000185567	ENST00000555122	Transcript	non_coding_transcript_exon_variant	16317	-	-	-	-	-	IMPACT=MODIFIER;STRAND=-1
	rs3742935	14	105405599	1	1	C	ENSG00000185567	ENST00000557457	Transcript	missense_variant	1427	1183	395	P/A	Cct/Gct	-	IMPACT=MODERATE;STRAND=-1
	rs4264326	14	105411700	1	1
	rs4465542	14	105407798	1	1	C	ENSG00000185567	ENST00000333244	Transcript	missense_variant	14110	13990	4664	T/A	Aca/Gca	-	IMPACT=MODERATE;STRAND=-1
	rs4465542	14	105407798	1	1	C	ENSG00000185567	ENST00000555122	Transcript	non_coding_transcript_exon_variant	14118	-	-	-	-	-	IMPACT=MODIFIER;STRAND=-1
	rs4465542	14	105407798	1	1	C	ENSG00000185567	ENST00000557457	Transcript	intron_variant	-	-	-	-	-	-	IMPACT=MODIFIER;STRAND=-1
	rs55797226	14	105413223	0.946725	1	NA	NA	NA	NA	NA	NA	NA	NA	NA	NA	NA	NA
	rs587775782	14	105560358	1	1	AGCCGCGA	ENSG00000257556	ENST00000546968	Transcript	upstream_gene_variant	-	-	-	-	-	-	IMPACT=MODIFIER;DISTANCE=1169;STRAND=1
	rs587775782	14	105560358	1	1	AGCCGCGA	ENSG00000257556	ENST00000548104	Transcript	intron_variant,non_coding_transcript_variant	-	-	-	-	-	-	IMPACT=MODIFIER;STRAND=1
	rs587775782	14	105560358	1	1	AGCCGCGA	ENSG00000257556	ENST00000548361	Transcript	upstream_gene_variant	-	-	-	-	-	-	IMPACT=MODIFIER;DISTANCE=1303;STRAND=1
	rs60106058	14	105414252	0.912184	1	T	ENSG00000185567	ENST00000333244	Transcript	synonymous_variant	7656	7536	2512	K	aaG/aaA	-	IMPACT=LOW;STRAND=-1
	rs60106058	14	105414252	0.912184	1	T	ENSG00000185567	ENST00000555122	Transcript	non_coding_transcript_exon_variant	7664	-	-	-	-	-	IMPACT=MODIFIER;STRAND=-1
	rs60106058	14	105414252	0.912184	1	T	ENSG00000185567	ENST00000557457	Transcript	intron_variant	-	-	-	-	-	-	IMPACT=MODIFIER;STRAND=-1
	rs60754080	14	105414238	0.924659	0.99754	A	ENSG00000185567	ENST00000333244	Transcript	missense_variant	7670	7550	2517	G/V	gGg/gTg	-	IMPACT=MODERATE;STRAND=-1
	rs60754080	14	105414238	0.924659	0.99754	A	ENSG00000185567	ENST00000555122	Transcript	non_coding_transcript_exon_variant	7678	-	-	-	-	-	IMPACT=MODIFIER;STRAND=-1
	rs60754080	14	105414238	0.924659	0.99754	A	ENSG00000185567	ENST00000557457	Transcript	intron_variant	-	-	-	-	-	-	IMPACT=MODIFIER;STRAND=-1
	rs72702027	14	105414629	1	1	A	ENSG00000185567	ENST00000333244	Transcript	missense_variant	7279	7159	2387	P/S	Cca/Tca	-	IMPACT=MODERATE;STRAND=-1
	rs72702027	14	105414629	1	1	A	ENSG00000185567	ENST00000555122	Transcript	non_coding_transcript_exon_variant	7287	-	-	-	-	-	IMPACT=MODIFIER;STRAND=-1
	rs72702027	14	105414629	1	1	A	ENSG00000185567	ENST00000557457	Transcript	intron_variant	-	-	-	-	-	-	IMPACT=MODIFIER;STRAND=-1
	rs74090129	14	105419234	0.832818	0.992078	C	ENSG00000185567	ENST00000333244	Transcript	missense_variant	2674	2554	852	M/V	Atg/Gtg	-	IMPACT=MODERATE;STRAND=-1
	rs74090129	14	105419234	0.832818	0.992078	C	ENSG00000185567	ENST00000555122	Transcript	non_coding_transcript_exon_variant	2682	-	-	-	-	-	IMPACT=MODIFIER;STRAND=-1
	rs74090129	14	105419234	0.832818	0.992078	C	ENSG00000185567	ENST00000555544	Transcript	downstream_gene_variant	-	-	-	-	-	-	IMPACT=MODIFIER;DISTANCE=640;STRAND=-1
	rs74090129	14	105419234	0.832818	0.992078	C	ENSG00000185567	ENST00000557457	Transcript	intron_variant	-	-	-	-	-	-	IMPACT=MODIFIER;STRAND=-1
	rs76231332	14	105417837	0.852183	0.989362	NA	NA	NA	NA	NA	NA	NA	NA	NA	NA	NA	NA
	rs775496435	14	105414790	0.97989	1	NA	NA	NA	NA	NA	NA	NA	NA	NA	NA	NA	NA
	rs78353106	14	105418638	0.826072	0.99339	NA	NA	NA	NA	NA	NA	NA	NA	NA	NA	NA	NA
	rs9671643	14	105408030	1	1	G	ENSG00000185567	ENST00000333244	Transcript	synonymous_variant	13878	13758	4586	D	gaT/gaC	-	IMPACT=LOW;STRAND=-1
	rs9671643	14	105408030	1	1	G	ENSG00000185567	ENST00000555122	Transcript	non_coding_transcript_exon_variant	13886	-	-	-	-	-	IMPACT=MODIFIER;STRAND=-1
	rs9671643	14	105408030	1	1	G	ENSG00000185567	ENST00000557457	Transcript	intron_variant	-	-	-	-	-	-	IMPACT=MODIFIER;STRAND=-1

## Sheet: Data_S3
	Supplementary Data 3. Functional impacts of a single amino acid replacement predicted by polyphen2 for the lead SNPs and their LD SNPs (r2 > 0.8).
	CHR	POS	A1	A2	SNP	Gene	acc	pos	aa1	aa2	nt1	nt2	prediction	based_on	effect	pph2_class	pph2_prob	pph2_FPR	pph2_TPR	pph2_FDR	site	region	PHAT	dScore	Score1	Score2	MSAv	Nobs	Nstruct	Nfilt	PDB_id	PDB_pos	PDB_ch	ident	length	NormASA	SecStr	MapReg	dVol	dProp	B-fact	H-bonds	AveNHet	MinDHet	AveNInt	MinDInt	AveNSit	MinDSit	Transv
	6	138196066	C,G	T	rs2230926	TNFAIP3	P21580	127	F	C	T	G	benign	alignment	?	neutral	0.013	0.216	0.957	0.234	NO	NO	?	0.787	-1.86	-2.647	2	41	20	19	3dkb	F	360	5127	0.98	-82	-0.12	H	A	0.219	-0.12	?	?	?	?	?	?	?	1
	14	105405599	A,C,T	G	rs3742935	AHNAK2	Q8IVF2	5397	P	A	C	G	probably_damaging	alignment_mz	?	deleterious	0.975	0.0436	0.762	0.072	NO	NO	?	1.503	-1.56	-3.063	3	30	?	?	?	?	?	?	?	?	?	?	?	?	?	?	?	?	?	?	?	?	1
	14	105406238	C,G,T	A	rs2819419	AHNAK2	Q8IVF2	5184	Y	D	T	G	benign	alignment_mz	?	neutral	0	1	1	0.575	NO	NO	?	-2.479	-4.299	-1.82	3	23	?	?	?	?	?	?	?	?	?	?	?	?	?	?	?	?	?	?	?	?	1
	14	105407798	A,C	T	rs4465542	AHNAK2	Q8IVF2	4664	T	A	A	G	benign	alignment_mz	?	neutral	0	1	1	0.575	NO	NO	?	-0.37	-2.581	-2.211	3	15	?	?	?	?	?	?	?	?	?	?	?	?	?	?	?	?	?	?	?	?	0
	14	105408811	G	A	rs2819421	AHNAK2	Q8IVF2	4326	L	P	T	C	benign	alignment	?	neutral	0	1	1	0.575	NO	NO	?	-2.325	-3.36	-1.035	2	159	?	?	?	?	?	?	?	?	?	?	?	?	?	?	?	?	?	?	?	?	0
	14	105408955	G,T	A	rs2819422	AHNAK2	Q8IVF2	4278	V	A	T	C	benign	alignment	?	neutral	0	1	1	0.575	NO	NO	?	-0.177	-2.368	-2.191	2	179	?	?	?	?	?	?	?	?	?	?	?	?	?	?	?	?	?	?	?	?	0
	14	105410183	C	T	rs10438246	AHNAK2	Q8IVF2	3869	M	V	A	G	benign	alignment_mz	?	neutral	0	1	1	0.575	NO	NO	?	-0.639	-2.23	-1.591	3	27	?	?	?	?	?	?	?	?	?	?	?	?	?	?	?	?	?	?	?	?	0
	14	105410411	T	C	rs11160825	AHNAK2	Q8IVF2	3793	D	N	G	A	possibly_damaging	alignment_mz	?	deleterious	0.792	0.0733	0.846	0.105	NO	NO	?	1.739	-1.747	-3.486	3	24	?	?	?	?	?	?	?	?	?	?	?	?	?	?	?	?	?	?	?	?	0
	14	105410827	T	C	rs28380382	AHNAK2	Q8IVF2	3654	G	E	G	A	benign	alignment_mz	?	neutral	0.395	0.105	0.896	0.137	NO	NO	?	0.842	-1.656	-2.498	3	22	?	?	?	?	?	?	?	?	?	?	?	?	?	?	?	?	?	?	?	?	0
	14	105411700	G	A	rs4264326	AHNAK2	Q8IVF2	2616	V	A	T	C	probably_damaging	alignment_mz	?	deleterious	0.987	0.036	0.731	0.0626	NO	NO	?	1.721	-1.257	-2.978	3	24	?	?	?	?	?	?	?	?	?	?	?	?	?	?	?	?	?	?	?	?	0
	14	105411781	A,C	G	rs10438247	AHNAK2	Q8IVF2	3336	P	L	C	T	probably_damaging	alignment	?	deleterious	0.999	0.00574	0.136	0.0192	NO	NO	?	1.635	-1.689	-3.324	2	50	?	?	?	?	?	?	?	?	?	?	?	?	?	?	?	?	?	?	?	?	0
	14	105412259	C,T	G	rs2819426	AHNAK2	Q8IVF2	2430	L	V	C	G	benign	alignment	?	neutral	0.234	0.121	0.912	0.152	NO	NO	?	0.309	-1.795	-2.104	2	39	?	?	?	?	?	?	?	?	?	?	?	?	?	?	?	?	?	?	?	?	1
	14	105414790	C,G,T	A	rs2582514	AHNAK2	Q8IVF2	2115	S	R	?	?	probably_damaging	alignment	?	deleterious	0.999	0.00574	0.136	0.0192	NO	NO	?	1.991	-1.583	-3.574	2	163	?	?	?	?	?	?	?	?	?	?	?	?	?	?	?	?	?	?	?	?	?
	14	105414790	C,G,T	A	rs2582513	AHNAK2	Q8IVF2	4478	P	L	C	T	probably_damaging	alignment	?	deleterious	1	0.00026	0.00018	0.0109	NO	NO	?	2.118	-1.236	-3.354	2	146	?	?	?	?	?	?	?	?	?	?	?	?	?	?	?	?	?	?	?	?	0
	14	105415469	C	T	rs11846918	AHNAK2	Q8IVF2	2107	M	V	A	G	benign	alignment	?	neutral	0.001	0.852	0.994	0.514	NO	NO	?	-2.331	-3.834	-1.503	2	163	?	?	?	?	?	?	?	?	?	?	?	?	?	?	?	?	?	?	?	?	0
	14	105416010	A,C	T	rs2582511	AHNAK2	Q8IVF2	4071	I	M	A	G	probably_damaging	alignment	?	deleterious	0.989	0.0346	0.723	0.0608	NO	NO	?	1.859	-1.975	-3.834	2	134	?	?	?	?	?	?	?	?	?	?	?	?	?	?	?	?	?	?	?	?	0
	14	105416959	G,T	A	rs2013462	AHNAK2	Q8IVF2	4085	A	V	C	T	probably_damaging	alignment	?	deleterious	0.999	0.00574	0.136	0.0192	NO	NO	?	1.641	-1.607	-3.248	2	107	?	?	?	?	?	?	?	?	?	?	?	?	?	?	?	?	?	?	?	?	0
	##	Sources:
	##	Predictions:	PolyPhen-2	v2.2.3r406
	##	Sequences:	UniProtKB/UniRef100	Release	2011_12		(14-Dec-2011)
	##	Structures:	PDB/DSSP	Snapshot	2021-05-25		(178229	Structures)
	##	Genes:	UCSC	MultiZ46Way	GRCh37/hg19		(08-Oct-2009)
[truncated: 7 more columns]

## Sheet: Data_S4
	Supplementary Data 4. Functional impacts of a single amino acid replacement predicted by SIFT for the lead SNPs and their LD SNPs (r2 > 0.8).
	CHR	POS	SNP	Ref	Alt	Transcript_id	Gene_id	Gene	Region	Ref_AA	Alt AA	AA position	SIFT_score	SIFT_median_sequence_info	Num_seqs_at_position	R2	D'
	6	138160722	rs111425486	NA	NA	NA	NA	NA	NA	NA	NA	NA		NA	NA	0.903097	0.989987
	6	138165690	rs112975146	NA	NA	NA	NA	NA	NA	NA	NA	NA		NA	NA	0.90373	0.990433
	6	138170589	rs1203883007	NA	NA	NA	NA	NA	NA	NA	NA	NA		NA	NA	0.925026	0.992522
	6	138170589	rs1228676354	NA	NA	NA	NA	NA	NA	NA	NA	NA		NA	NA	0.925026	0.992522
	6	138190533	rs1458193656	NA	NA	NA	NA	NA	NA	NA	NA	NA		NA	NA	0.835737	0.99721
	6	138230038	rs148314165	NA	NA	NA	NA	NA	NA	NA	NA	NA		NA	NA	0.993745	0.998321
	6	138190529	rs1491493145	NA	NA	NA	NA	NA	NA	NA	NA	NA		NA	NA	0.835793	0.997182
	6	138230040	rs200820567	NA	NA	NA	NA	NA	NA	NA	NA	NA		NA	NA	0.993328	0.99893
	6	138196066	rs2230926	T	C	ENST00000237289	ENSG00000118503	TNFAIP3	CDS	F	S	127	0.116	3.19	27	0.999797	1
	6	138196066	rs2230926	T	C	ENST00000420009	ENSG00000118503	TNFAIP3	CDS	F	S	127	0.076	3.3	22	0.999797	1
	6	138196066	rs2230926	T	C	ENST00000612899	ENSG00000118503	TNFAIP3	CDS	F	S	127	0.116	3.19	27	0.999797	1
	6	138196066	rs2230926	T	C	ENST00000614035	ENSG00000118503	TNFAIP3	CDS	F	S	127	0.077	3.23	28	0.999797	1
	6	138196066	rs2230926	T	C	ENST00000615468	ENSG00000118503	TNFAIP3	CDS	F	S	127	0.046	3.5	22	0.999797	1
	6	138196066	rs2230926	T	C	ENST00000619035	ENSG00000118503	TNFAIP3	CDS	F	S	127	0.102	3.17	28	0.999797	1
	6	138196066	rs2230926	T	C	ENST00000620204	ENSG00000118503	TNFAIP3	CDS	F	S	127	0.102	3.26	27	0.999797	1
	6	138196066	rs2230926	T	C	ENST00000621150	ENSG00000118503	TNFAIP3	CDS	F	S	127	0.101	3.23	28	0.999797	1
	6	138196066	rs2230926	T	G	ENST00000237289	ENSG00000118503	TNFAIP3	CDS	F	C	127	0.113	3.19	27	0.999797	1
	6	138196066	rs2230926	T	G	ENST00000420009	ENSG00000118503	TNFAIP3	CDS	F	C	127	0.093	3.3	22	0.999797	1
	6	138196066	rs2230926	T	G	ENST00000612899	ENSG00000118503	TNFAIP3	CDS	F	C	127	0.113	3.19	27	0.999797	1
	6	138196066	rs2230926	T	G	ENST00000614035	ENSG00000118503	TNFAIP3	CDS	F	C	127	0.084	3.23	28	0.999797	1
	6	138196066	rs2230926	T	G	ENST00000615468	ENSG00000118503	TNFAIP3	CDS	F	C	127	0.062	3.5	22	0.999797	1
	6	138196066	rs2230926	T	G	ENST00000619035	ENSG00000118503	TNFAIP3	CDS	F	C	127	0.101	3.17	28	0.999797	1
	6	138196066	rs2230926	T	G	ENST00000620204	ENSG00000118503	TNFAIP3	CDS	F	C	127	0.097	3.26	27	0.999797	1
	6	138196066	rs2230926	T	G	ENST00000621150	ENSG00000118503	TNFAIP3	CDS	F	C	127	0.097	3.23	28	0.999797	1
	14	105402994	rs10083374	T	C	ENST00000392593	ENSG00000166428	PLD4	UTR_3	NA	NA	NA		NA	NA	1	1
	14	105402418	rs10083490	C	T	ENST00000392593	ENSG00000166428	PLD4	UTR_3	NA	NA	NA		NA	NA	1	1
	14	105402786	rs10083496	G	A	ENST00000392593	ENSG00000166428	PLD4	UTR_3	NA	NA	NA		NA	NA	1	1
	14	105414810	rs10145032	C	G	ENST00000333244	ENSG00000185567	AHNAK2	CDS	L	L	2326	0.177	2.91	22	0.980982	1
	14	105414810	rs10145032	C	G	ENST00000555122	ENSG00000185567	AHNAK2	UTR_5	NA	NA	NA		NA	NA	0.980982	1
	14	105414810	rs10145032	C	T	ENST00000333244	ENSG00000185567	AHNAK2	CDS	L	L	2326	0.177	2.91	22	0.980982	1
	14	105414810	rs10145032	C	T	ENST00000555122	ENSG00000185567	AHNAK2	UTR_5	NA	NA	NA		NA	NA	0.980982	1
	14	105403474	rs10149193	C	T	ENST00000392593	ENSG00000166428	PLD4	UTR_3	NA	NA	NA		NA	NA	1	1
	14	105409959	rs10152073	G	T	ENST00000333244	ENSG00000185567	AHNAK2	CDS	A	A	3943	1	2.85	29	1	1
	14	105409959	rs10152073	G	T	ENST00000555122	ENSG00000185567	AHNAK2	UTR_5	NA	NA	NA		NA	NA	1	1
	14	105396693	rs1036713	NA	NA	NA	NA	NA	NA	NA	NA	NA		NA	NA	0.994243	0.998076
	14	105410183	rs10438246	T	C	ENST00000333244	ENSG00000185567	AHNAK2	CDS	M	V	3869	1	2.95	17	1	1
	14	105410183	rs10438246	T	C	ENST00000555122	ENSG00000185567	AHNAK2	UTR_5	NA	NA	NA		NA	NA	1	1
	14	105411781	rs10438247	G	A	ENST00000333244	ENSG00000185567	AHNAK2	CDS	P	L	3336	0.002	2.83	34	1	1
	14	105411781	rs10438247	G	A	ENST00000555122	ENSG00000185567	AHNAK2	UTR_5	NA	NA	NA		NA	NA	1	1
	14	105404384	rs1048257	T	C	ENST00000333244	ENSG00000185567	AHNAK2	UTR_3	NA	NA	NA		NA	NA	1	1
	14	105404384	rs1048257	T	C	ENST00000555122	ENSG00000185567	AHNAK2	UTR_5	NA	NA	NA		NA	NA	1	1
	14	105404384	rs1048257	T	C	ENST00000557457	ENSG00000185567	AHNAK2	UTR_3	NA	NA	NA		NA	NA	1	1
	14	105410411	rs11160825	C	T	ENST00000333244	ENSG00000185567	AHNAK2	CDS	D	N	3793	0.039	2.86	27	1	1
	14	105410411	rs11160825	C	T	ENST00000555122	ENSG00000185567	AHNAK2	UTR_5	NA	NA	NA		NA	NA	1	1
	14	105407031	rs11623422	A	G	ENST00000333244	ENSG00000185567	AHNAK2	CDS	S	S	4919	1	3.4	9	1	1
	14	105407031	rs11623422	A	G	ENST00000555122	ENSG00000185567	AHNAK2	UTR_5	NA	NA	NA		NA	NA	1	1
	14	105418391	rs11625007	C	T	ENST00000333244	ENSG00000185567	AHNAK2	CDS	V	I	1133	1	2.97	19	0.92244	0.973202
	14	105418391	rs11625007	C	T	ENST00000555122	ENSG00000185567	AHNAK2	UTR_5	NA	NA	NA		NA	NA	0.92244	0.973202
	14	105415469	rs11846918	T	C	ENST00000333244	ENSG00000185567	AHNAK2	CDS	M	V	2107	1	2.88	18	0.866588	0.956023
	14	105415469	rs11846918	T	C	ENST00000555122	ENSG00000185567	AHNAK2	UTR_5	NA	NA	NA		NA	NA	0.866588	0.956023
	14	105408827	rs11850949	NA	NA	NA	NA	NA	NA	NA	NA	NA		NA	NA	1	1
	14	105407208	rs11851053	T	C	ENST00000333244	ENSG00000185567	AHNAK2	CDS	V	V	4860	1	2.96	14	1	1
	14	105407208	rs11851053	T	C	ENST00000555122	ENSG00000185567	AHNAK2	UTR_5	NA	NA	NA		NA	NA	1	1
	14	105412542	rs12433815	NA	NA	NA	NA	NA	NA	NA	NA	NA		NA	NA	1	1
	14	105412541	rs12433837	C	T	ENST00000333244	ENSG00000185567	AHNAK2	CDS	V	I	3083	0.311	2.9	28	1	1
	14	105412541	rs12433837	C	T	ENST00000555122	ENSG00000185567	AHNAK2	UTR_5	NA	NA	NA		NA	NA	1	1
	14	105412554	rs12436986	T	C	ENST00000333244	ENSG00000185567	AHNAK2	CDS	G	G	3078	1	2.9	29	1	1
	14	105412554	rs12436986	T	C	ENST00000555122	ENSG00000185567	AHNAK2	UTR_5	NA	NA	NA		NA	NA	1	1
	14	105412554	rs12436986	T	G	ENST00000333244	ENSG00000185567	AHNAK2	CDS	G	G	3078	1	2.9	29	1	1
	14	105412554	rs12436986	T	G	ENST00000555122	ENSG00000185567	AHNAK2	UTR_5	NA	NA	NA		NA	NA	1	1
	14	105418504	rs151013711	G	T	ENST00000333244	ENSG00000185567	AHNAK2	CDS	A	D	1095	1	2.94	19	0.826547	0.993411
	14	105418504	rs151013711	G	T	ENST00000555122	ENSG00000185567	AHNAK2	UTR_5	NA	NA	NA		NA	NA	0.826547	0.993411
	14	105417774	rs2013228	G	A	ENST00000333244	ENSG00000185567	AHNAK2	CDS	F	F	1338	1	2.94	19	0.864911	0.986912
	14	105417774	rs2013228	G	A	ENST00000555122	ENSG00000185567	AHNAK2	UTR_5	NA	NA	NA		NA	NA	0.864911	0.986912
	14	105416959	rs2013462	A	G	ENST00000333244	ENSG00000185567	AHNAK2	CDS	V	A	1610	0.358	2.86	26	0.845982	0.962031
	14	105416959	rs2013462	A	G	ENST00000555122	ENSG00000185567	AHNAK2	UTR_5	NA	NA	NA		NA	NA	0.845982	0.962031
	14	105416959	rs2013462	A	T	ENST00000333244	ENSG00000185567	AHNAK2	CDS	V	E	1610	0.097	2.86	26	0.845982	0.962031
	14	105416959	rs2013462	A	T	ENST00000555122	ENSG00000185567	AHNAK2	UTR_5	NA	NA	NA		NA	NA	0.845982	0.962031
	14	105417102	rs2248966	T	C	ENST00000333244	ENSG00000185567	AHNAK2	CDS	P	P	1562	1	2.97	20	0.878567	0.980845
	14	105417102	rs2248966	T	C	ENST00000555122	ENSG00000185567	AHNAK2	UTR_5	NA	NA	NA		NA	NA	0.878567	0.980845
	14	105417766	rs2396457	G	A	ENST00000333244	ENSG00000185567	AHNAK2	CDS	S	F	1341	0.005	2.99	20	0.844672	0.992876
	14	105417766	rs2396457	G	A	ENST00000555122	ENSG00000185567	AHNAK2	UTR_5	NA	NA	NA		NA	NA	0.844672	0.992876
	14	105417766	rs2396457	G	C	ENST00000333244	ENSG00000185567	AHNAK2	CDS	S	C	1341	0.005	2.99	20	0.844672	0.992876
	14	105417766	rs2396457	G	C	ENST00000555122	ENSG00000185567	AHNAK2	UTR_5	NA	NA	NA		NA	NA	0.844672	0.992876
	14	105416010	rs2582511	T	C	ENST00000333244	ENSG00000185567	AHNAK2	CDS	T	T	1926	0.168	2.93	20	0.923011	0.982026
	14	105416010	rs2582511	T	C	ENST00000555122	ENSG00000185567	AHNAK2	UTR_5	NA	NA	NA		NA	NA	0.923011	0.982026
	14	105414790	rs2582513	A	G	ENST00000333244	ENSG00000185567	AHNAK2	CDS	L	P	2333	1	2.98	18	0.97989	1
	14	105414790	rs2582513	A	G	ENST00000555122	ENSG00000185567	AHNAK2	UTR_5	NA	NA	NA		NA	NA	0.97989	1
	14	105413204	rs2582514	G	A	ENST00000333244	ENSG00000185567	AHNAK2	CDS	R	C	2862	0.019	2.83	28	1	1
	14	105413204	rs2582514	G	A	ENST00000555122	ENSG00000185567	AHNAK2	UTR_5	NA	NA	NA		NA	NA	1	1
	14	105413204	rs2582514	G	T	ENST00000333244	ENSG00000185567	AHNAK2	CDS	R	S	2862	0.699	2.83	28	1	1
	14	105413204	rs2582514	G	T	ENST00000555122	ENSG00000185567	AHNAK2	UTR_5	NA	NA	NA		NA	NA	1	1
	14	105398787	rs2582533	NA	NA	NA	NA	NA	NA	NA	NA	NA		NA	NA	0.998034	1
	14	105406238	rs2819419	A	C	ENST00000333244	ENSG00000185567	AHNAK2	CDS	Y	D	5184	0.706	3.32	12	1	1
	14	105406238	rs2819419	A	C	ENST00000555122	ENSG00000185567	AHNAK2	UTR_5	NA	NA	NA		NA	NA	1	1
	14	105406238	rs2819419	A	C	ENST00000557457	ENSG00000185567	AHNAK2	CDS	Y	D	182	0.635	3.01	11	1	1
	14	105408811	rs2819421	A	G	ENST00000333244	ENSG00000185567	AHNAK2	CDS	L	P	4326	0.454	2.88	21	1	1
	14	105408811	rs2819421	A	G	ENST00000555122	ENSG00000185567	AHNAK2	UTR_5	NA	NA	NA		NA	NA	1	1
	14	105408955	rs2819422	A	G	ENST00000333244	ENSG00000185567	AHNAK2	CDS	V	A	4278	1	3.13	14	1	1
	14	105408955	rs2819422	A	G	ENST00000555122	ENSG00000185567	AHNAK2	UTR_5	NA	NA	NA		NA	NA	1	1
	14	105410775	rs2819424	A	G	ENST00000333244	ENSG00000185567	AHNAK2	CDS	D	D	3671	1	2.85	29	1	1
	14	105410775	rs2819424	A	G	ENST00000555122	ENSG00000185567	AHNAK2	UTR_5	NA	NA	NA		NA	NA	1	1
	14	105412259	rs2819426	G	C	ENST00000333244	ENSG00000185567	AHNAK2	CDS	L	V	3177	1	2.82	31	0.946572	1
	14	105412259	rs2819426	G	C	ENST00000555122	ENSG00000185567	AHNAK2	UTR_5	NA	NA	NA		NA	NA	0.946572	1
	14	105412259	rs2819426	G	T	ENST00000333244	ENSG00000185567	AHNAK2	CDS	L	M	3177	0.049	2.82	31	0.946572	1
	14	105412259	rs2819426	G	T	ENST00000555122	ENSG00000185567	AHNAK2	UTR_5	NA	NA	NA		NA	NA	0.946572	1
	14	105410827	rs28380382	C	T	ENST00000333244	ENSG00000185567	AHNAK2	CDS	G	E	3654	0.05	2.87	28	1	1
	14	105410827	rs28380382	C	T	ENST00000555122	ENSG00000185567	AHNAK2	UTR_5	NA	NA	NA		NA	NA	1	1
	14	105405942	rs28454709	G	A	ENST00000333244	ENSG00000185567	AHNAK2	CDS	L	L	5282	0.87	3.51	13	1	1
	14	105405942	rs28454709	G	A	ENST00000555122	ENSG00000185567	AHNAK2	UTR_5	NA	NA	NA		NA	NA	1	1
	14	105405942	rs28454709	G	A	ENST00000557457	ENSG00000185567	AHNAK2	CDS	L	L	280	0.947	3.04	13	1	1
	14	105408315	rs28600075	T	C	ENST00000333244	ENSG00000185567	AHNAK2	CDS	P	P	4491	1	2.9	19	1	1
	14	105408315	rs28600075	T	C	ENST00000555122	ENSG00000185567	AHNAK2	UTR_5	NA	NA	NA		NA	NA	1	1
	14	105405599	rs3742935	NA	NA	NA	NA	NA	NA	NA	NA	NA		NA	NA	1	1
	14	105411700	rs4264326	A	G	ENST00000333244	ENSG00000185567	AHNAK2	CDS	V	A	3363	0.596	2.85	31	1	1
	14	105411700	rs4264326	A	G	ENST00000555122	ENSG00000185567	AHNAK2	UTR_5	NA	NA	NA		NA	NA	1	1
	14	105407798	rs4465542	T	C	ENST00000333244	ENSG00000185567	AHNAK2	CDS	T	A	4664	0.524	3.35	6	1	1
	14	105407798	rs4465542	T	C	ENST00000555122	ENSG00000185567	AHNAK2	UTR_5	NA	NA	NA		NA	NA	1	1
	14	105413223	rs55797226	A	G	ENST00000333244	ENSG00000185567	AHNAK2	CDS	D	D	2855	1	2.84	30	0.946725	1
	14	105413223	rs55797226	A	G	ENST00000555122	ENSG00000185567	AHNAK2	UTR_5	NA	NA	NA		NA	NA	0.946725	1
	14	105560358	rs587775782	NA	NA	NA	NA	NA	NA	NA	NA	NA		NA	NA	1	1
	14	105414252	rs60106058	C	T	ENST00000333244	ENSG00000185567	AHNAK2	CDS	K	K	2512	1	2.84	27	0.912184	1
	14	105414252	rs60106058	C	T	ENST00000555122	ENSG00000185567	AHNAK2	UTR_5	NA	NA	NA		NA	NA	0.912184	1
	14	105414238	rs60754080	C	A	ENST00000333244	ENSG00000185567	AHNAK2	CDS	G	V	2517	1	3.46	12	0.924659	0.99754
	14	105414238	rs60754080	C	A	ENST00000555122	ENSG00000185567	AHNAK2	UTR_5	NA	NA	NA		NA	NA	0.924659	0.99754
	14	105414629	rs72702027	G	A	ENST00000333244	ENSG00000185567	AHNAK2	CDS	P	S	2387	0.01	2.9	23	1	1
	14	105414629	rs72702027	G	A	ENST00000555122	ENSG00000185567	AHNAK2	UTR_5	NA	NA	NA		NA	NA	1	1
	14	105419234	rs74090129	T	A	ENST00000333244	ENSG00000185567	AHNAK2	CDS	M	L	852	0.935	3.02	16	0.832818	0.992078
	14	105419234	rs74090129	T	A	ENST00000555122	ENSG00000185567	AHNAK2	UTR_5	NA	NA	NA		NA	NA	0.832818	0.992078
	14	105419234	rs74090129	T	C	ENST00000333244	ENSG00000185567	AHNAK2	CDS	M	V	852	0.989	3.02	16	0.832818	0.992078
	14	105419234	rs74090129	T	C	ENST00000555122	ENSG00000185567	AHNAK2	UTR_5	NA	NA	NA		NA	NA	0.832818	0.992078
	14	105417837	rs76231332	A	C	ENST00000333244	ENSG00000185567	AHNAK2	CDS	A	A	1317	1	3.34	15	0.852183	0.989362
	14	105417837	rs76231332	A	C	ENST00000555122	ENSG00000185567	AHNAK2	UTR_5	NA	NA	NA		NA	NA	0.852183	0.989362
	14	105417837	rs76231332	A	G	ENST00000333244	ENSG00000185567	AHNAK2	CDS	A	A	1317	1	3.34	15	0.852183	0.989362
	14	105417837	rs76231332	A	G	ENST00000555122	ENSG00000185567	AHNAK2	UTR_5	NA	NA	NA		NA	NA	0.852183	0.989362
	14	105414790	rs775496435	NA	NA	NA	NA	NA	NA	NA	NA	NA		NA	NA	0.97989	1
	14	105418638	rs78353106	A	G	ENST00000333244	ENSG00000185567	AHNAK2	CDS	P	P	1050	0.26	3.16	14	0.826072	0.99339
	14	105418638	rs78353106	A	G	ENST00000555122	ENSG00000185567	AHNAK2	UTR_5	NA	NA	NA		NA	NA	0.826072	0.99339
	14	105408030	rs9671643	A	G	ENST00000333244	ENSG00000185567	AHNAK2	CDS	D	D	4586	1	2.87	19	1	1
	14	105408030	rs9671643	A	G	ENST00000555122	ENSG00000185567	AHNAK2	UTR_5	NA	NA	NA		NA	NA	1	1
