# Supplementary material for: GWAS for Systemic Sclerosis Identified six novel susceptibility loci including penetrating Fcγ-Receptor Region
Source: Research Square preprint supplement (doi:10.21203/rs.3.rs-2712663/v1), 2023-04-07
Supplement: Supplementary file 1 [file 545878f149efa8f8af76bd92.pdf]

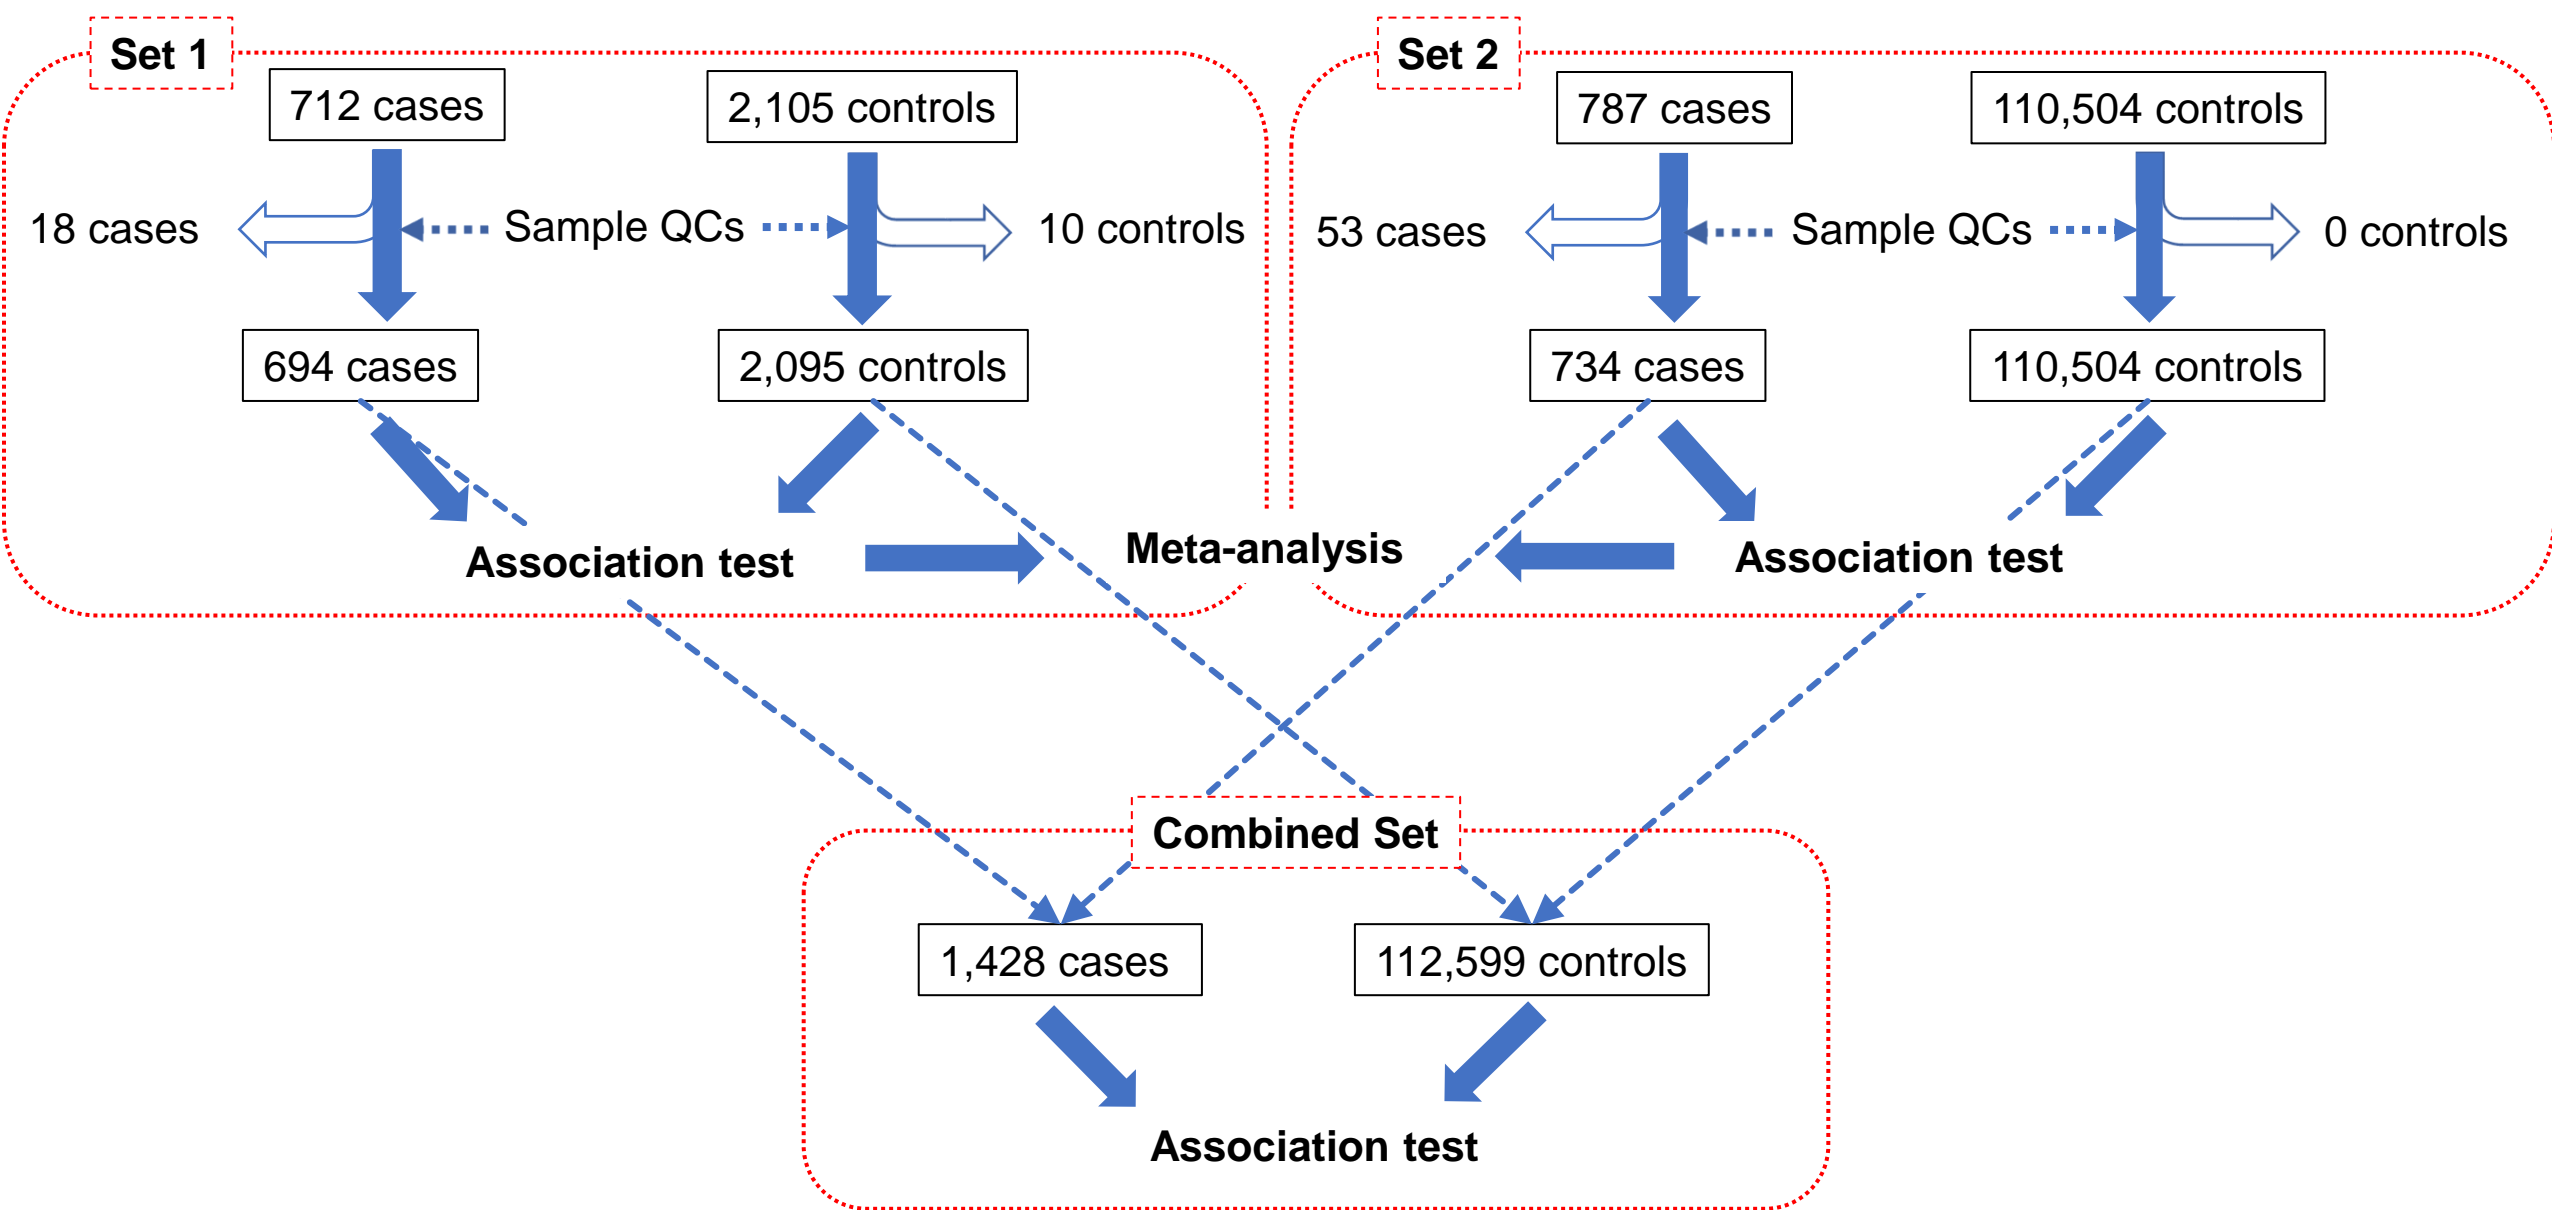

**Supplementary Fig. 1 A workflow of sample quality controls, association tests, and meta-analysis for the Japanese samples in the present study.**  
Set 1 consisted of 712 cases enrolled in the previous study and 2,105 controls. Set 2 consisted of newly enrolled 787 cases and 110,504 controls enrolled from the BioBank Japan project. Indicated numbers of subjects were excluded after sample quality controls (QCs) leaving 694 cases and 2,095 controls in Set 1 and 734 cases and 110,504 controls in Set 2. Association tests were conducted for each set and the results were meta-analyzed. Sets 1 and 2 were combined to generate the combined dataset consisting of 1,428 cases and 112,599 controls and an association test was conducted.

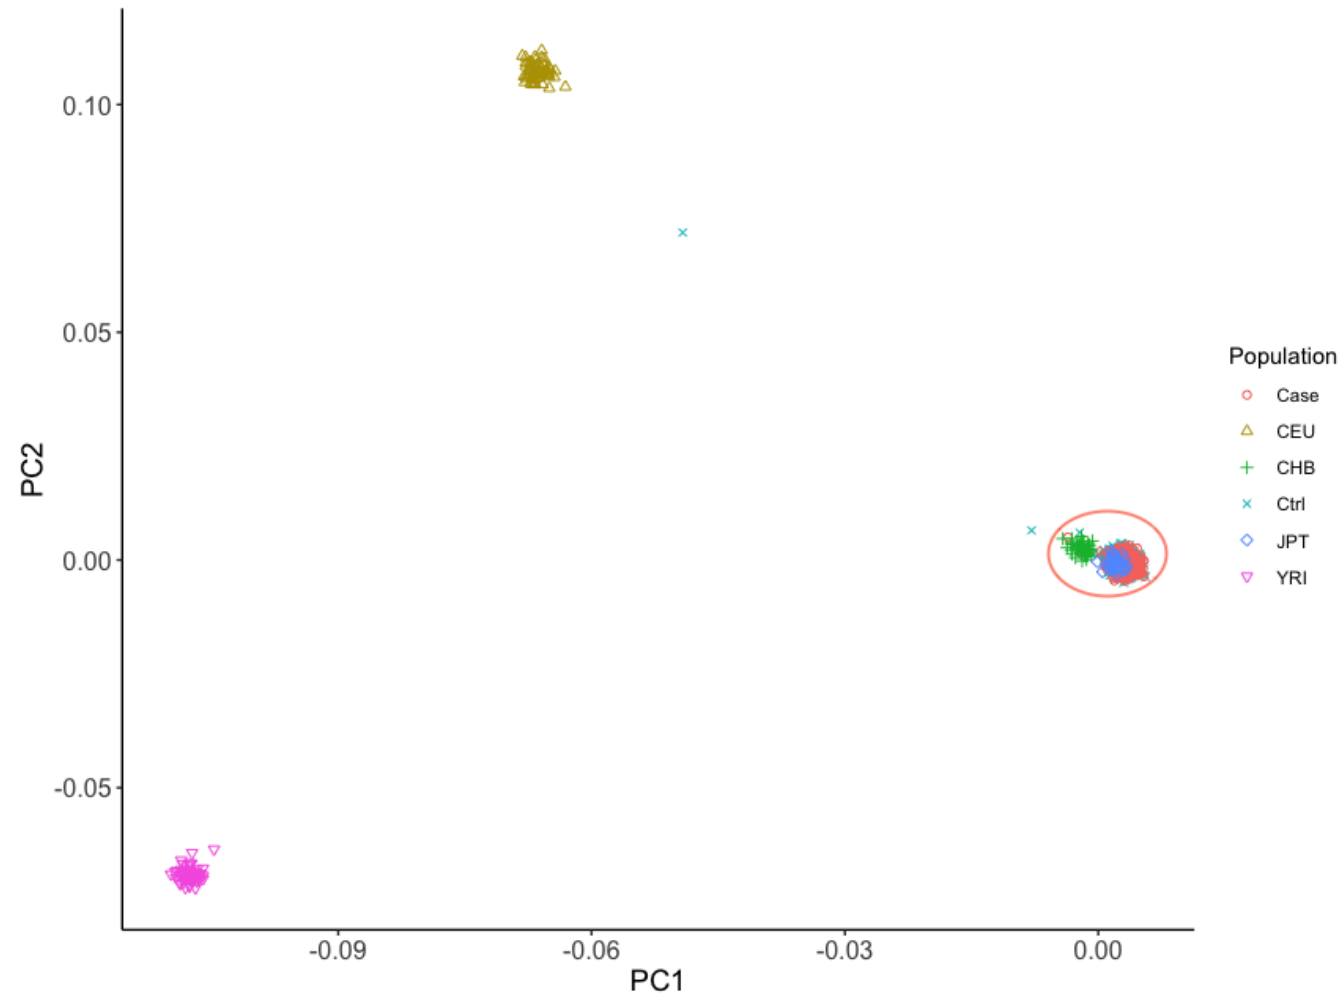

**Supplementary Fig. 2 Principal component analysis for population stratification**

Samples in the present study (Case and Ctrl) were subjected to principal component analysis based on the four populations, YRI, CEU, CHB, and JPT. The samples plotted outside the red circle, representing an east Asian cluster, were excluded from the subsequent analyses. YRI, Yoruba in Ibadan, Nigeria; CEU, Utah residents with Northern and Western European ancestry from the CEPH collection; CHB, Han Chinese in Beijing, China; JPT, Japanese in Tokyo, Japan.

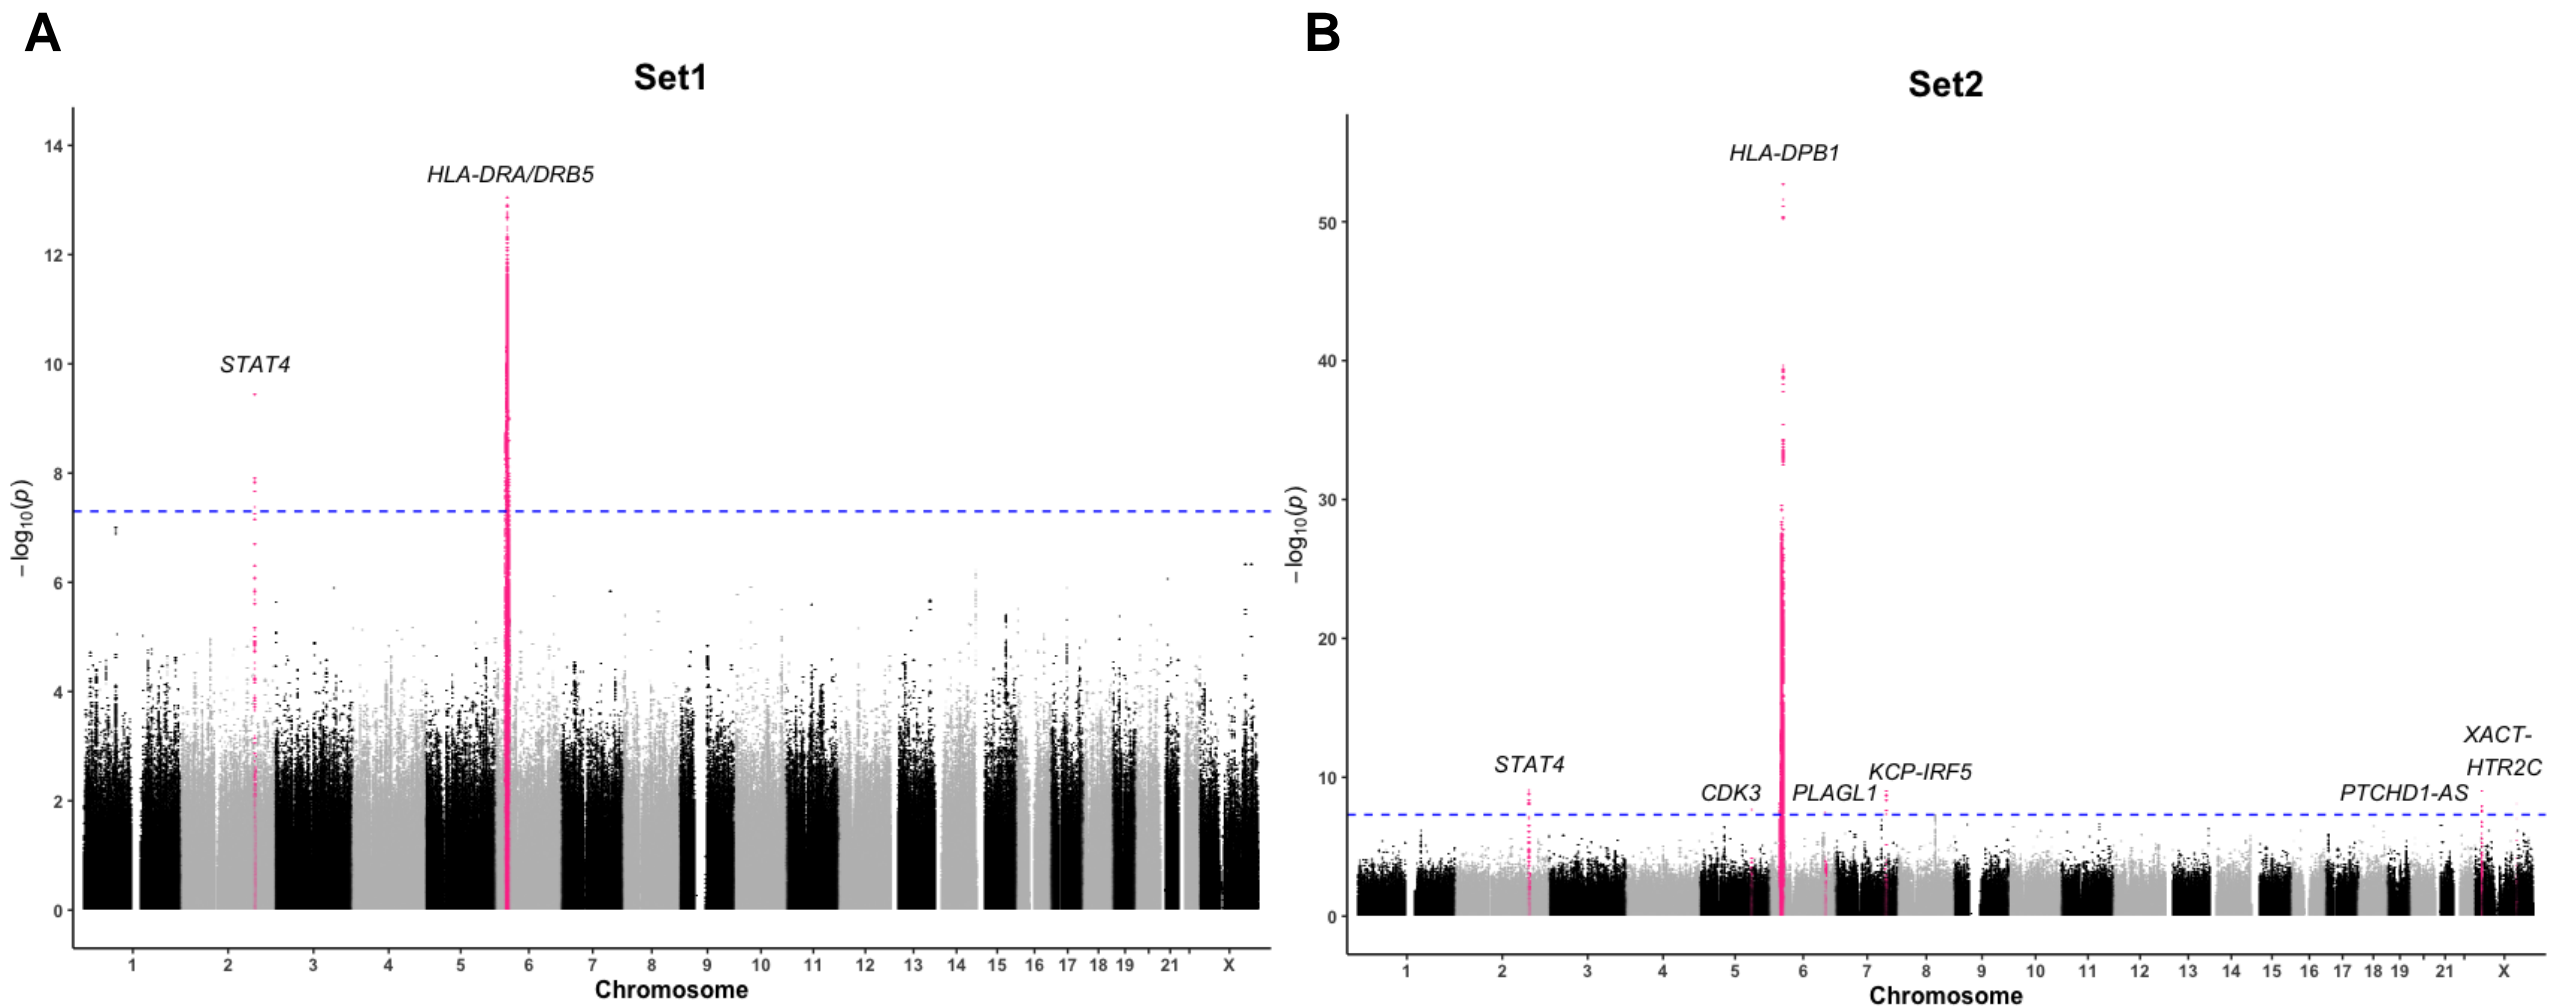

**Supplementary Fig. 3 Manhattan plots of association tests for Set 1 and Set 2**

Manhattan plots of association tests for Set 1 (A) and Set 2 (B) of Japanese samples are presented. Genome-wide significance ( $p=5\times 10^{-8}$ ) threshold is presented by a blue dot line.

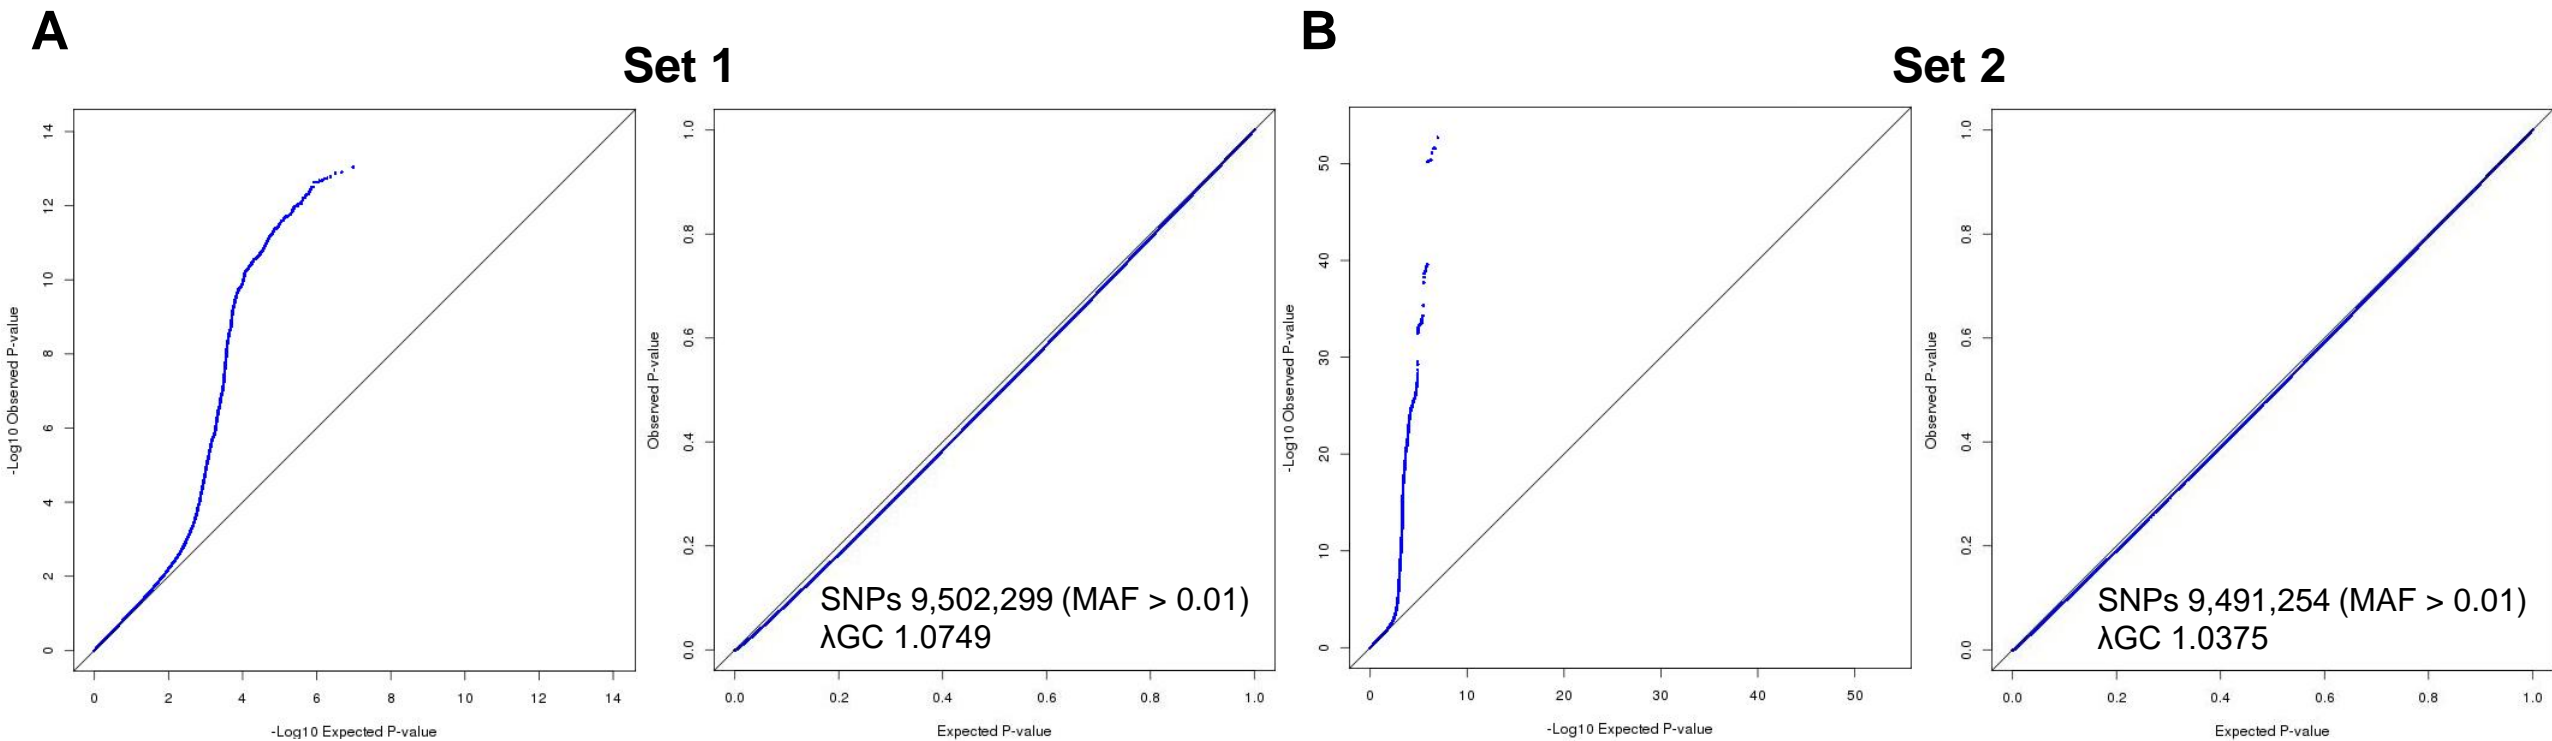

**Supplementary Fig. 4 Quantile-quantile plots of association tests for Set 1 and Set 2.**

Quantile-quantile plots (QQ plots) of association tests for Set 1 (A) and Set 2 (B) of the Japanese samples are presented.

The numbers of SNPs included in the analyses and genomic inflation factors ( $\lambda$ GC) are presented in the boxes right below the graphs.

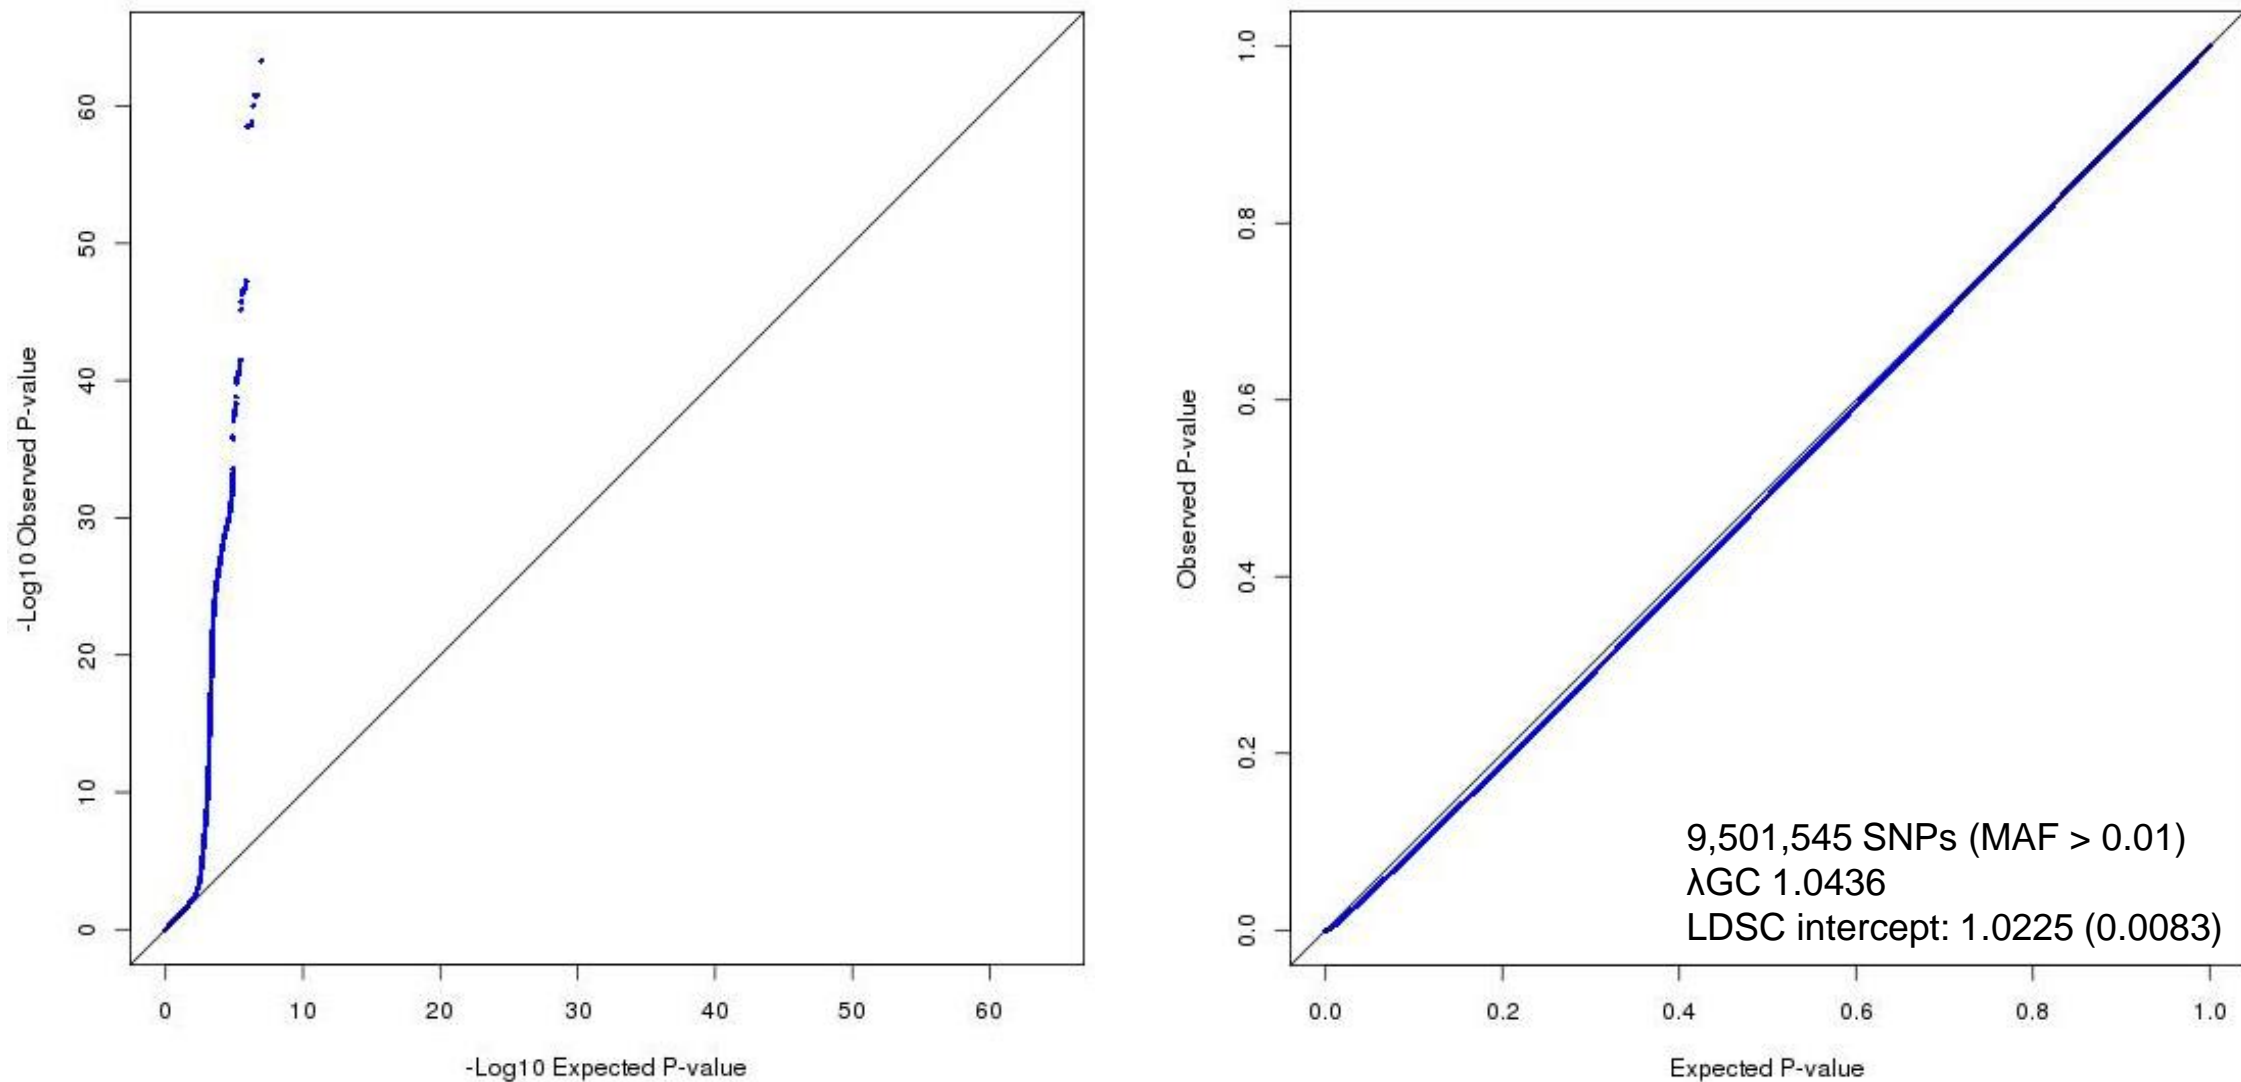

**Supplementary Fig. 5 Quantile-quantile plot of the association test for a combined Japanese dataset.**

Quantile-quantile plots (Q-Q plots) of an association test for a combined Japanese dataset are presented. Data are plotted in  $-\log_{10}$  (p-values) (left) or in natural numbers (right). The number of SNPs with minor allele frequency (MAF) > 0.01 included, a genomic inflation factor ( $\lambda_{GC}$ ), and an intercept of linkage disequilibrium score regression (LDSC) are presented at the bottom of the right panel.

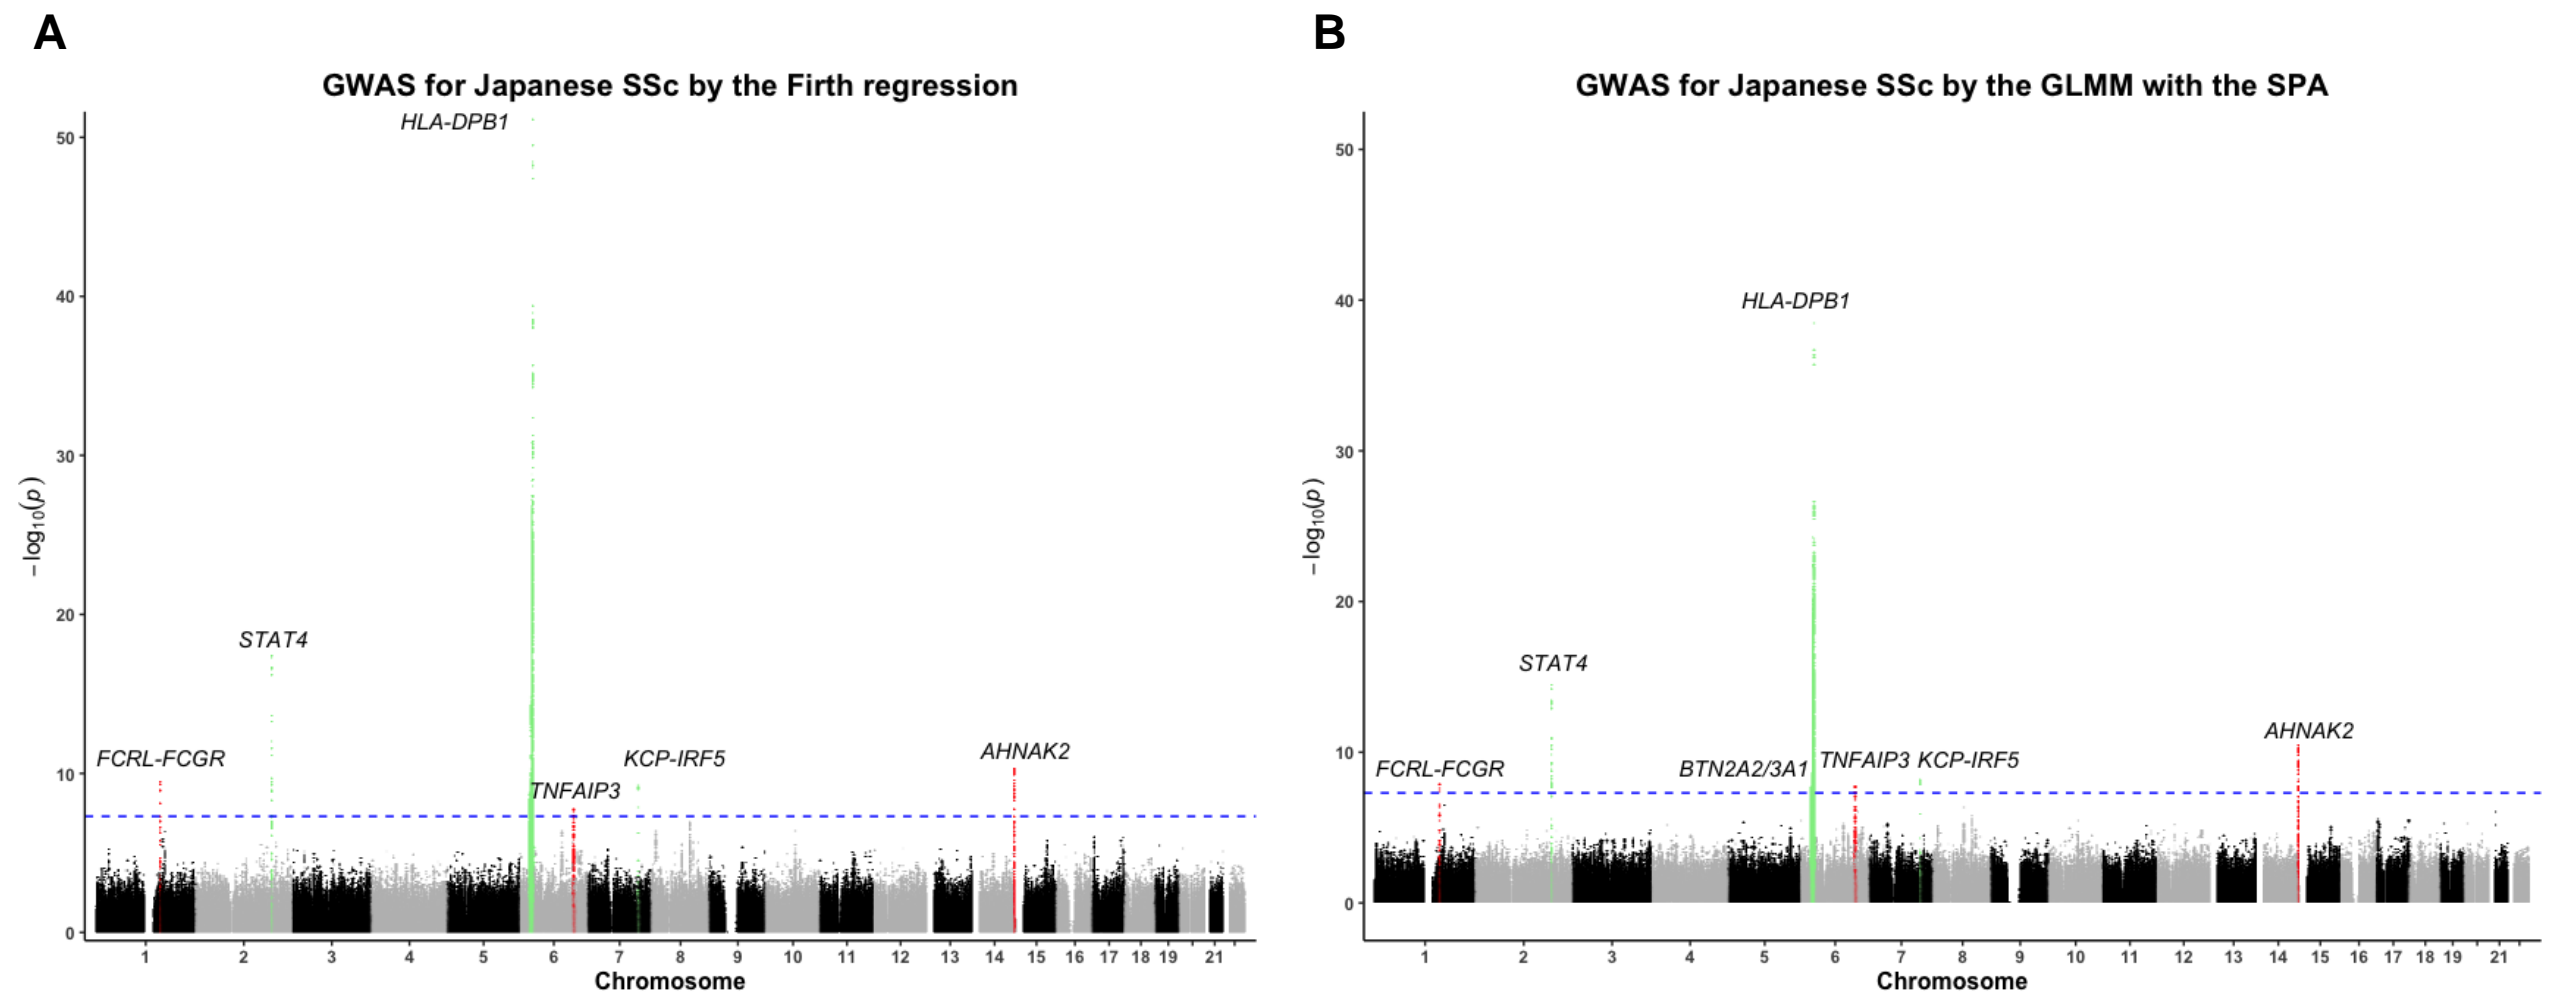

**Supplementary Fig. 6 Manhattan plots of the association tests for a combined Japanese dataset by the firth regression and a generalized mixed model with the saddle point approximation.**

Manhattan plots of association tests by the firth regression (A) and a generalized linear mixed model (GLMM) with the saddle point approximation (SPA) (B) are presented. Genome-wide significance ( $p=5 \times 10^{-8}$ ) threshold is presented by a blue dotted line.

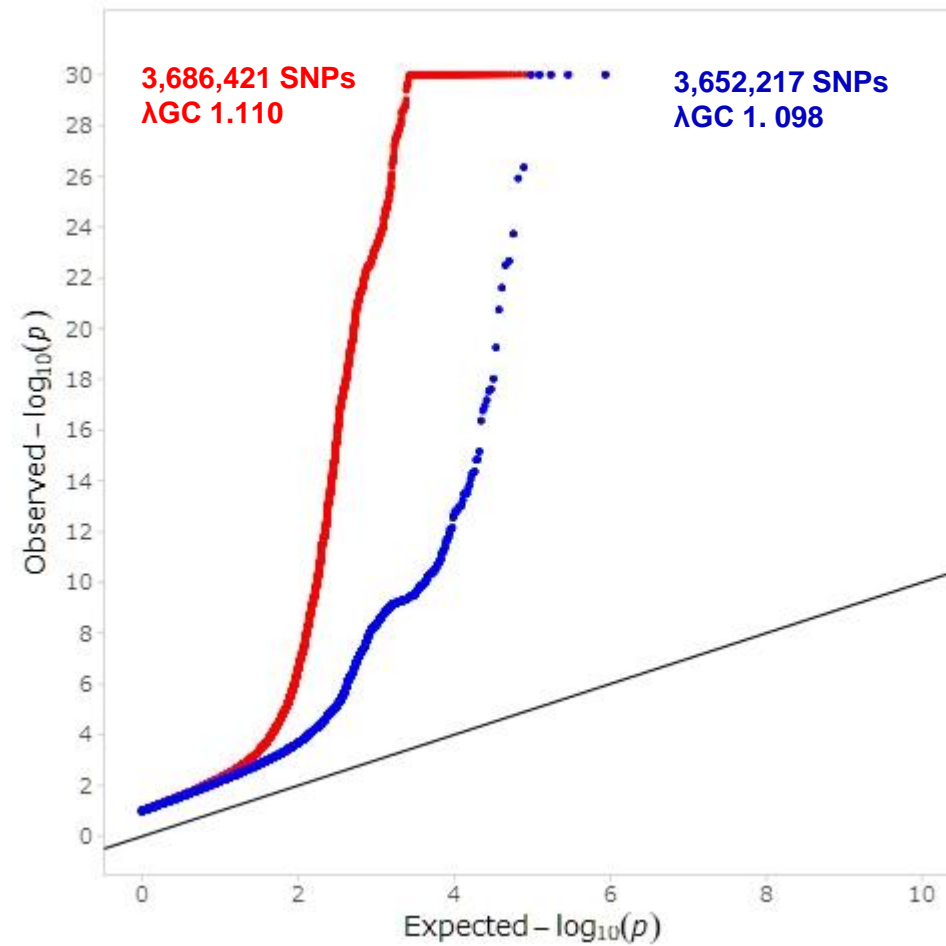

**Supplementary Fig. 7 Quantile-quantile (QQ) plot of a meta-analysis for the European and the Japanese GWASs**

The Q-Q plots of the trans-ethnic GWAS for European and Japanese GWAS of systemic sclerosis with (red) or without (blue) SNPs in the HLA region

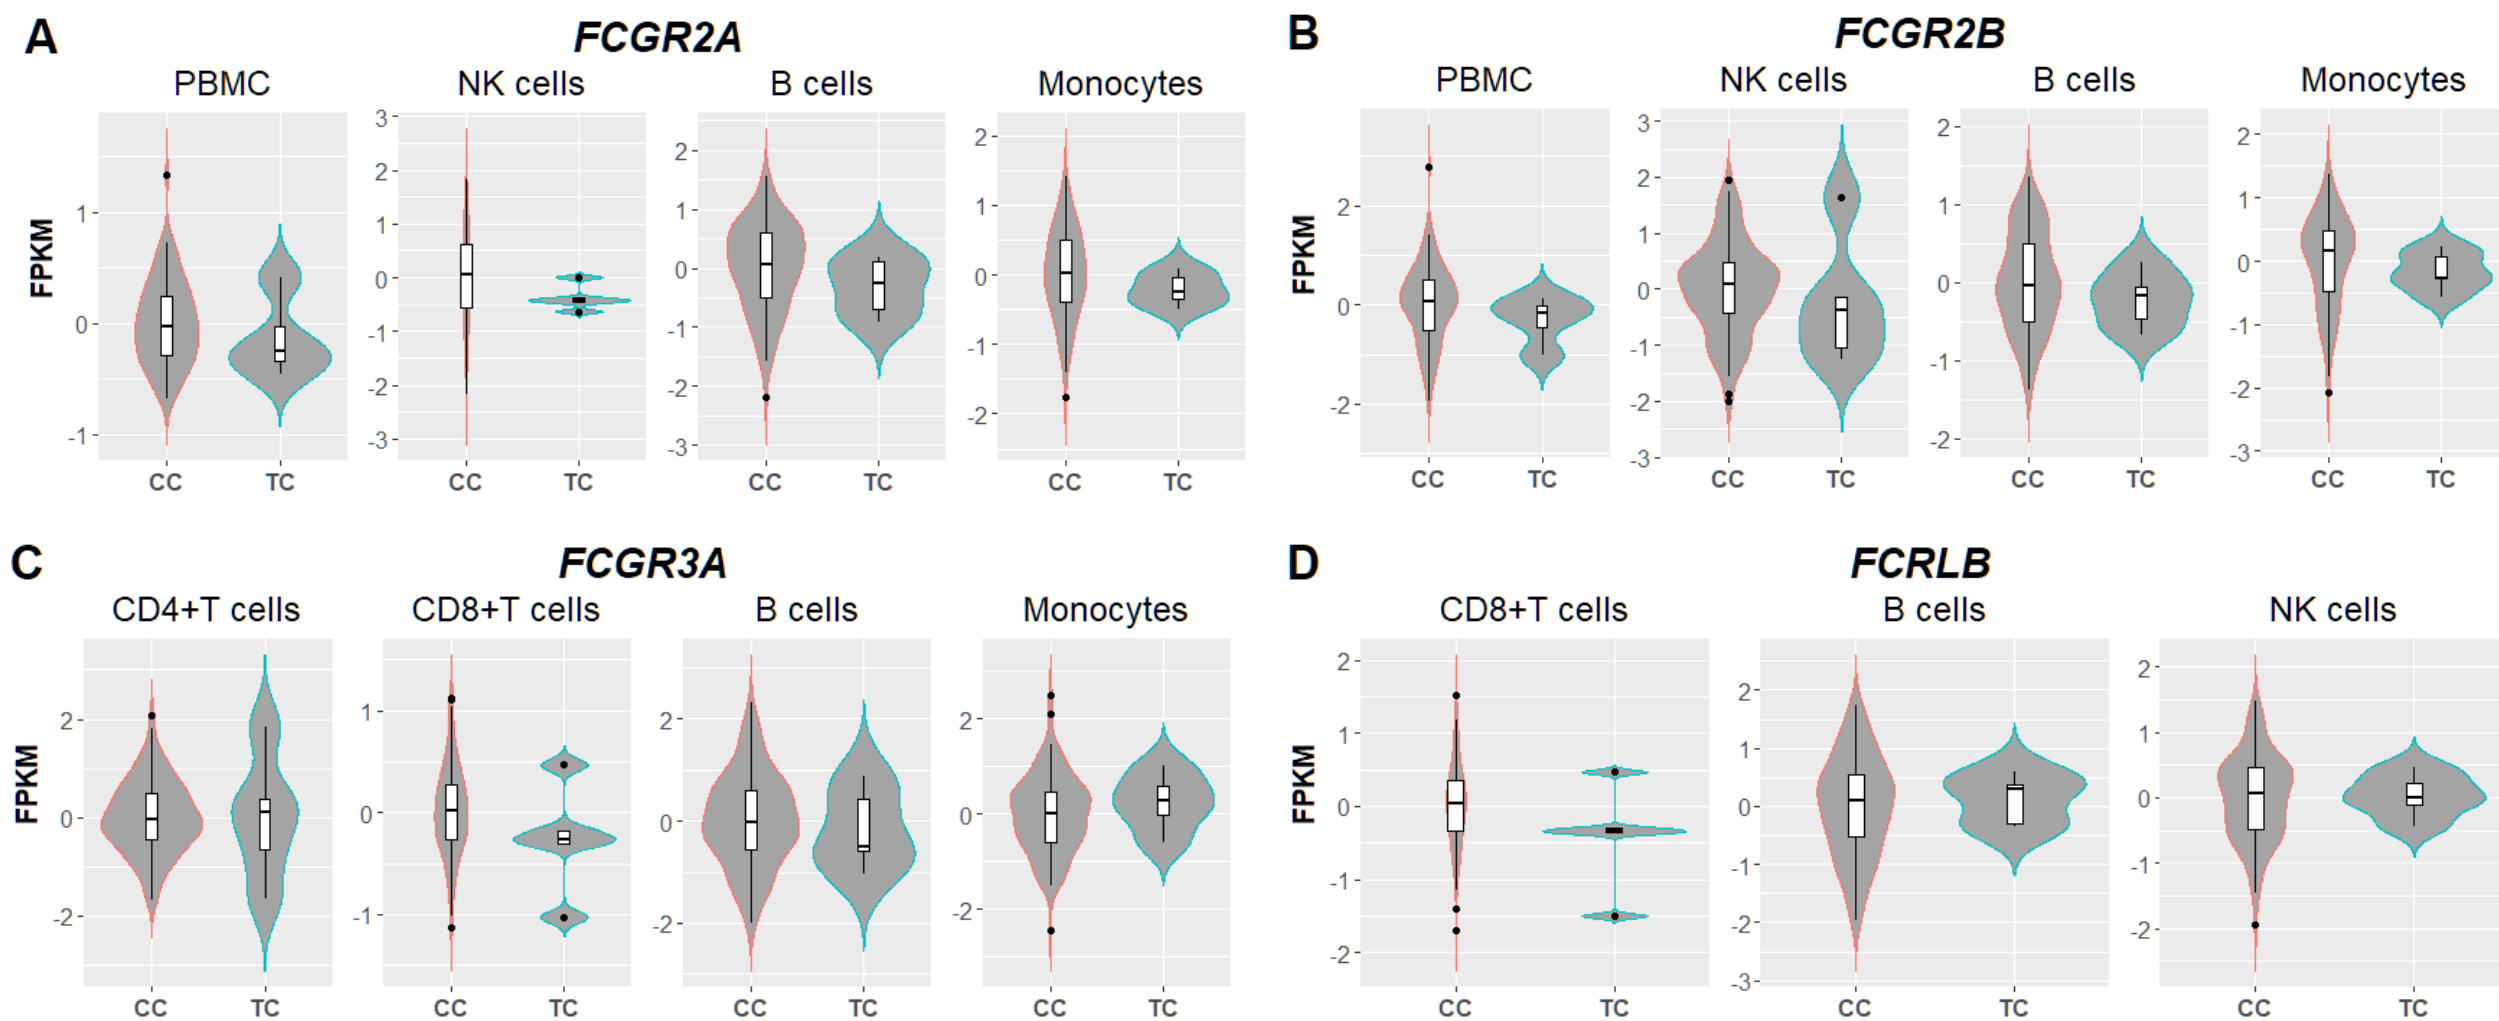

**Supplementary Fig. 8 Associations of rs10917688 with the expression of *FCGR2A*, *FCGR2B*, *FCGR3A*, and *FCRLB*.**

The expression of *FCGR2A*, *FCGR2B*, *FCGR3A*, and *FCRLB* in the different cell types by rs10917688 genotypes are presented.

Difference of expression between genotypes was compared by unpaired t-tests and an only significant p-value ( $p < 0.05$ ) is presented.

Genotype information was extracted from the Japanese eQTL dataset of six white blood cell subpopulations (N=110).

C and T are the reference allele and the alternative allele, respectively. There were no subjects with homozygous for the alternative allele (TT).



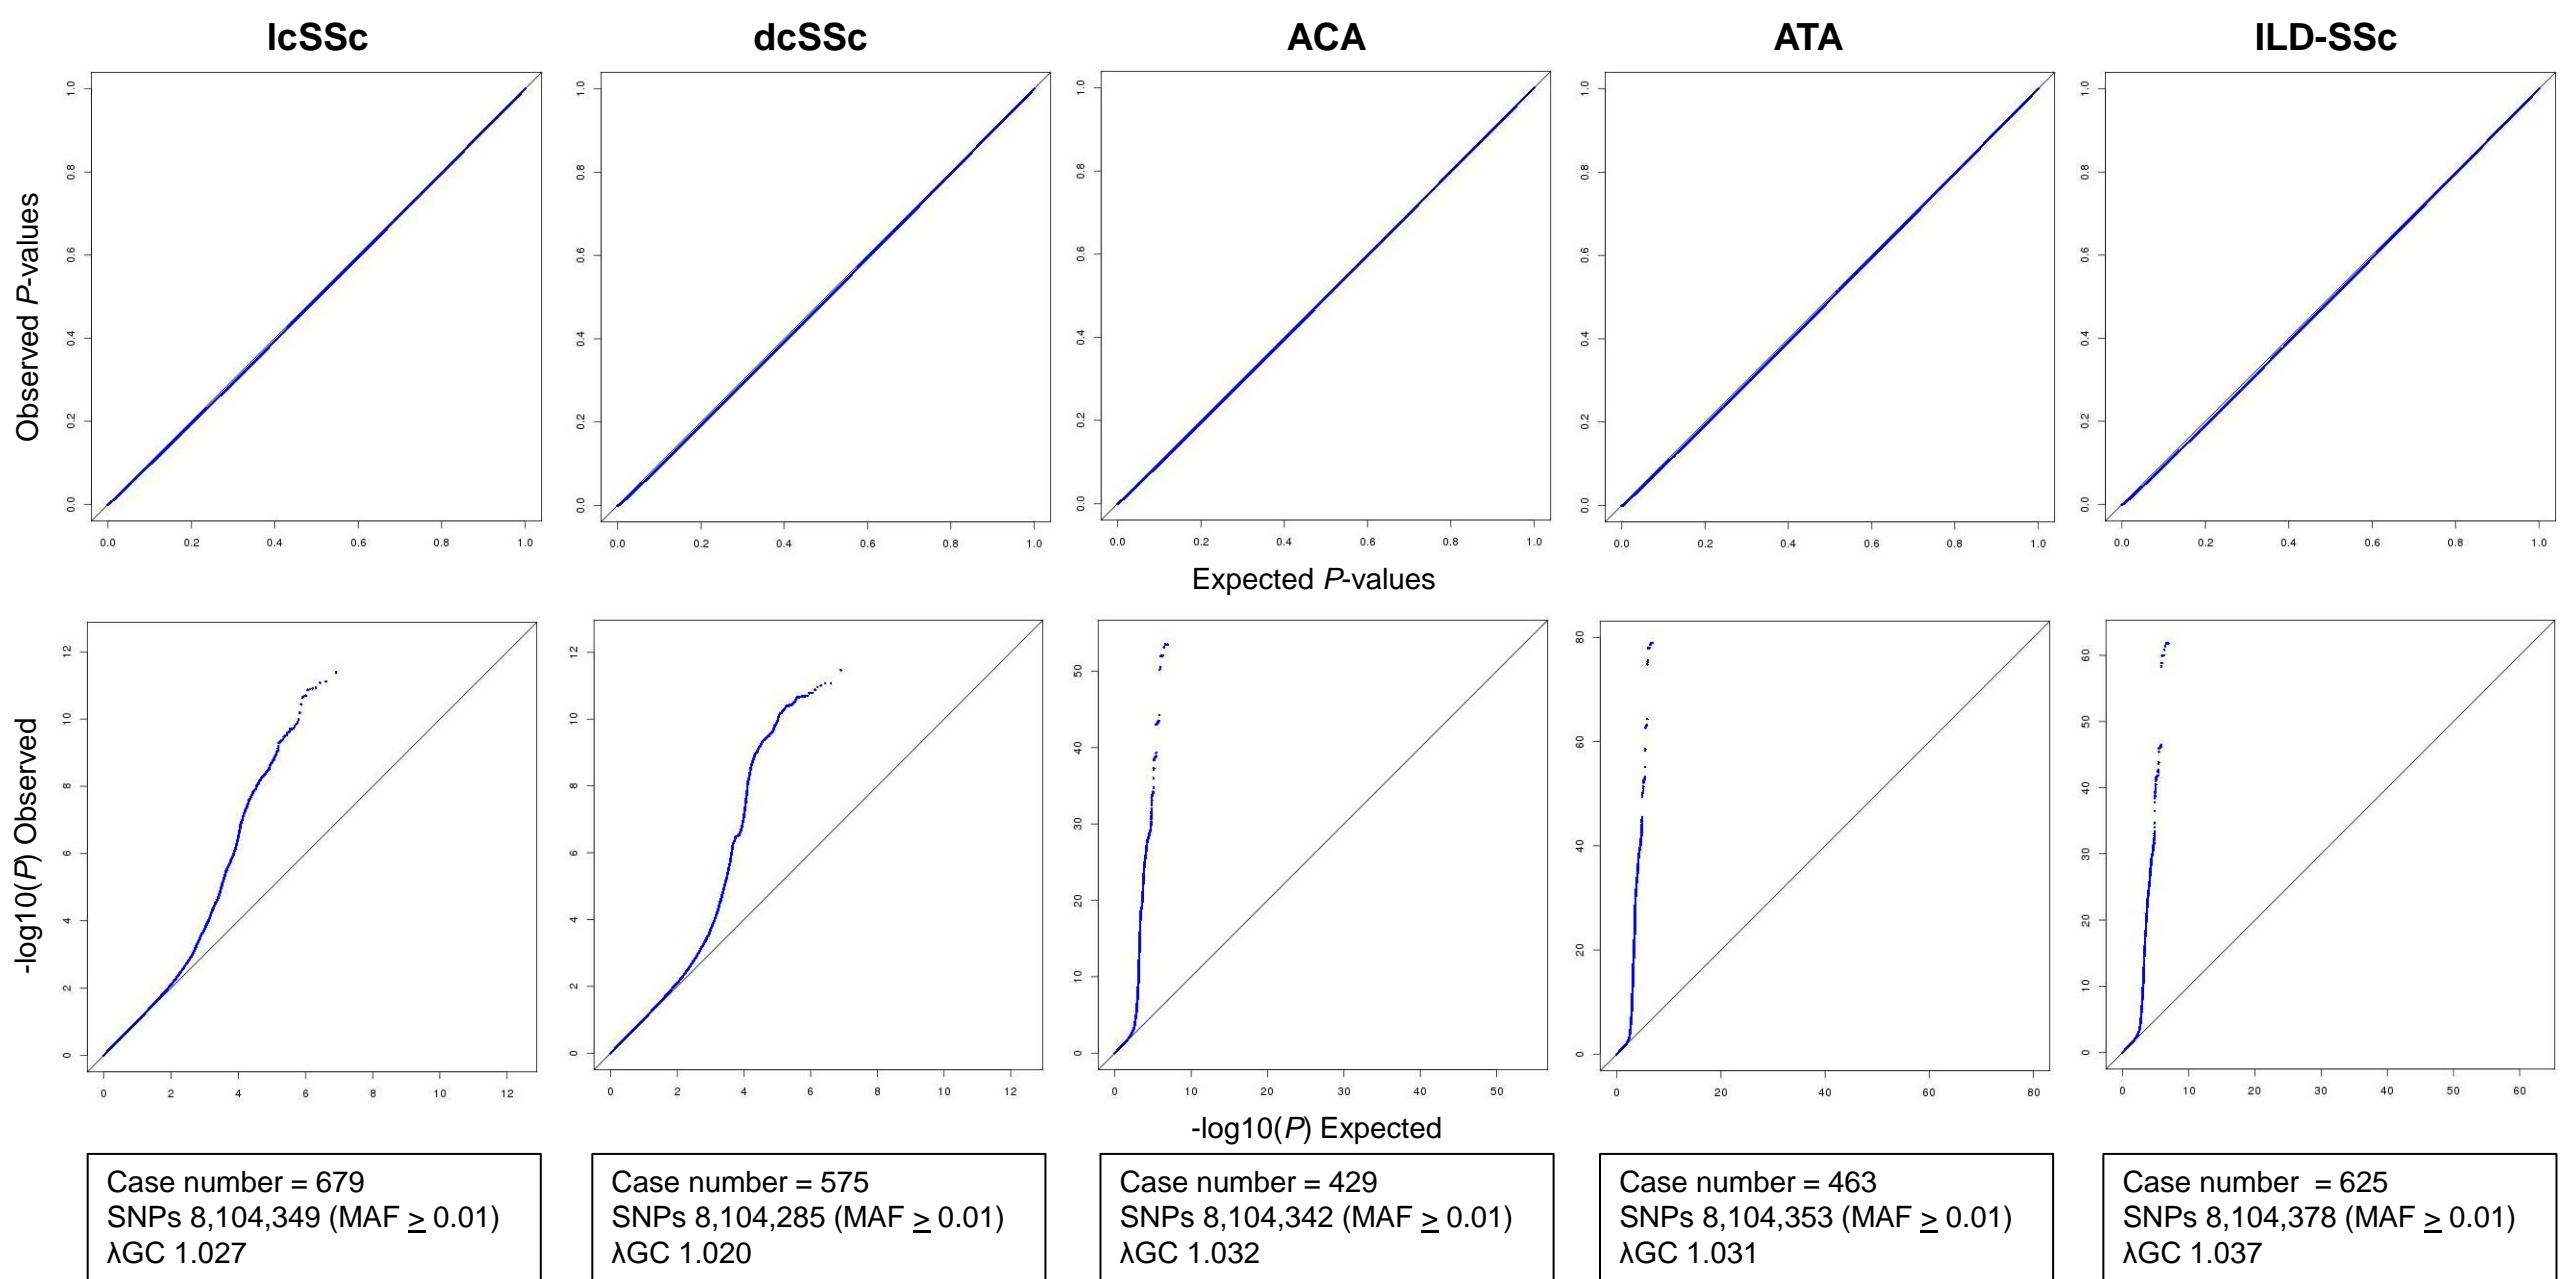

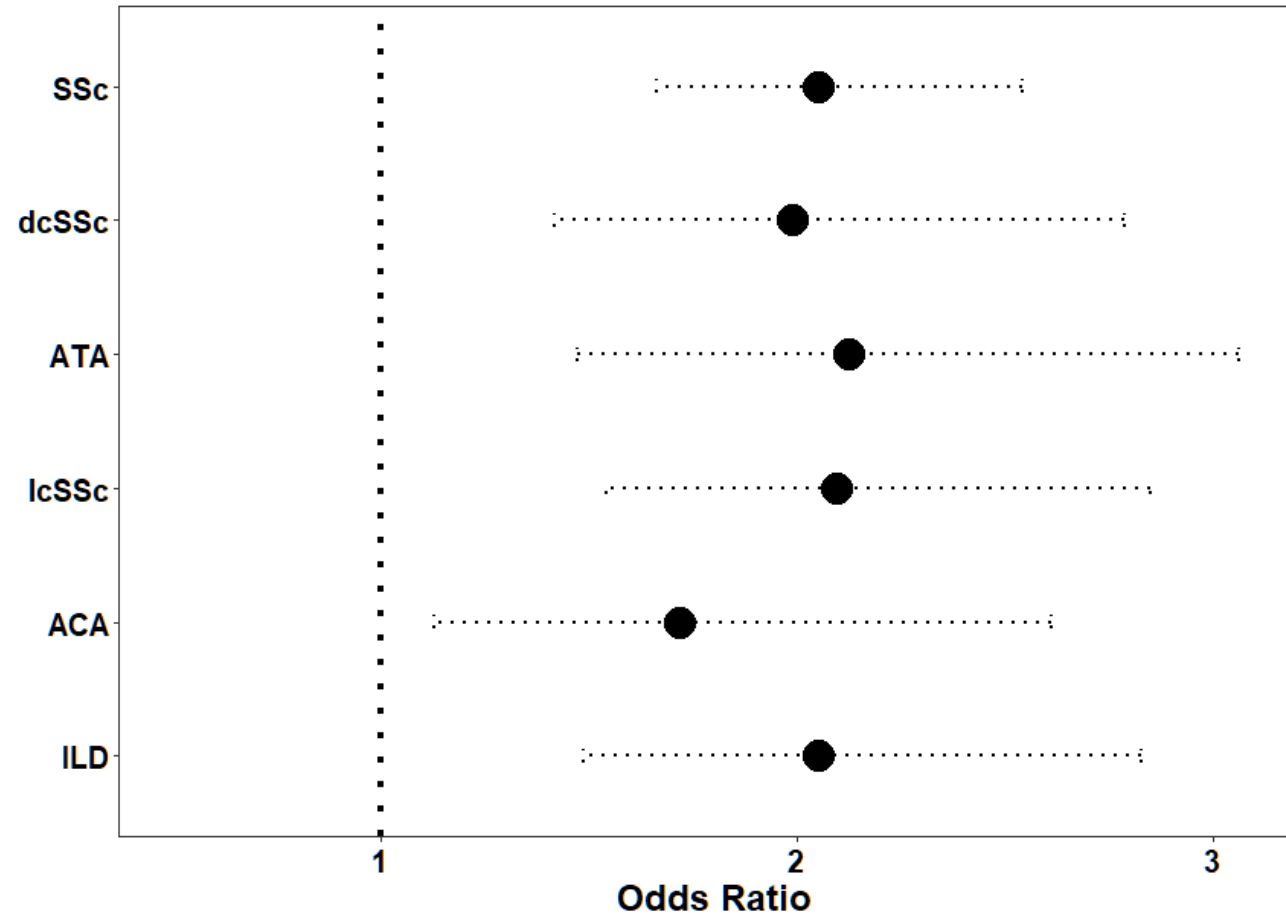

**Supplementary Fig. 10 Comparable risk of rs6697139 among major subtypes of SSc except for the ACA-positive subset.**

Odd ratios (black dots) with 95% confidence intervals (dotted bars) of rs6697139 in association tests for an entire SSc and the major clinical subtypes are presented. SSc, systemic sclerosis; lcSSc, limited cutaneous SSc; dcSSc, diffuse cutaneous SSc; ATA anti-topoisomerase I antibody; ACA, anti-centromere antibody; ILD, interstitial lung disease.
