# Supplementary material for: GWAS for Systemic Sclerosis Identified six novel susceptibility loci including penetrating Fcγ-Receptor Region
Source: Research Square preprint supplement (doi:10.21203/rs.3.rs-2712663/v1), 2023-04-07
Supplement: Supplementary file 2 [file c6843c2dd484f210eef458ce.xlsx]

## Sheet: Table S1
	Supplementary Table 1. The summary data of the previous GWASs and the present GWAS for 27 known risk loci
							Known significant loci					Present GWAS
	SNP	CHR	BP	GENE	A1	A2	OR	95% CI		P		OR	95% CI		P
	rs3790566	1	67814440	IL12RB2	T	C	0.858738	1.10934	1.2224	3.84e-10		0.965808	0.88457	1.05451	0.437722
	rs2056626	1	167420425	CD247	G	T	0.8088	0.75988	0.86087	1.31e-11		0.952677	0.851438	1.06595	0.397706
	rs1857066	1	173332629	LOC100506023	A	C	0.8698	0.829273	0.912307	5.02e-09		0.794289	0.682675	0.924152	0.00287399
	rs16832798	2	191534372	NAB1	C	T	0.846382	0.799401	0.896124	5.2e-09		1.04197	0.967256	1.12246	0.278795
	rs3821236	2	191902758	STAT4	A	G	1.3129	1.24406	1.38555	1.94e-23		1.25196	1.16257	1.34824	2.76392e-09
	rs4076852	3	58375286	PXK	G	A	1.1629	1.11002	1.2183	1.04e-10		1.04673	0.957447	1.14434	0.315379
	rs9884090	3	119116150	ARHGAP31	A	G	0.8347	0.788809	0.883261	1.89e-10		0.866108	0.797061	0.941137	0.00069589
	rs589446	3	159733527	IL12A-AS1	T	G	0.8591	0.819191	0.900953	1.95e-10		0.975444	0.849784	1.11969	0.723837
	rs11724804	4	965779	DGKQ	A	G	1.1672	1.11369	1.22328	5.31e-11		1.05877	0.972959	1.15215	0.185412
	rs230534	4	103449041	NFKB1	T	C	1.1512	1.09696	1.20812	5.38e-09		1.16701	1.07646	1.26518	0.000178405
	rs3792783	5	150455732	TNIP1	G	A	1.2042	1.14238	1.26937	2.42e-12		1.0912	1.00238	1.18789	0.0439255
	rs633724	6	106734040	ATG5	T	C	1.1321	1.08582	1.18036	2.84e-09		1.05761	0.982503	1.13846	0.136141
	*rs36073657	7	128651522	TNPO3	T	C	1.4031	1.3073	1.50592	3.1e-21		0.89	0.79	1	0.0559
	rs2736340	8	11343973	FAM167A-BLK	C	T	0.805153	0.769501	0.842457	3.33e-21		0.796469	0.728288	0.871034	6.2304e-07
	rs685985	8	61564964	RAB2A-CHD7	T	A	0.868	0.824333	0.913981	3.82e-08		0.915007	0.846153	0.989464	0.0260592
	rs6598008	11	618172	CDHR5	A	G	0.8021	0.741413	0.867754	1.97e-08		0.949622	0.866703	1.04047	0.267501
	rs2651804	11	2348619	TSPAN32-CD81-AS1	T	C	0.8164	0.765821	0.870319	2.54e-10		0.9836	0.910616	1.06243	0.674209
	rs11217020	11	118639353	DDX6	A	G	0.8414	0.799328	0.885687	2.08e-11		0.957325	0.850715	1.0773	0.469078
	rs1378942	15	75077367	CSK	C	A	1.1789	1.12973	1.23021	1.84e-14		0.913883	0.831246	1.00473	0.0625638
	rs11117420	16	85971922	IRF8-LINC01082	C	G	0.8056	0.762866	0.850727	3.82e-15		0.803455	0.707988	0.911795	0.000697066
	rs883770	17	38063381	GSDMB	T	C	1.1254	1.08089	1.17174	4.79e-09		1.0844	0.9978	1.17851	0.0563783
	rs1005714	17	73224639	NUP85	G	C	0.853	0.806038	0.902698	1.87e-08		0.908505	0.793214	1.04055	0.165796
	rs2305743	19	18193191	IL12RB1	A	G	0.8293	0.78106	0.880519	4.64e-10		0.973679	0.88609	1.06993	0.579166
	rs4317244	4	186320906	LPR2BP	G	C	1.53	1.31	1.79	4.17e-08		1.16079	0.975561	1.3812	0.0927608
	rs4134466	6	106577368	PRDM1	G	A	1.17351	0.809806	0.896694	6.6e-10		1.2165	1.12616	1.31408	6.43129e-07
	rs45471499	14	106321330	IGHM	A	G	1.55	1.35	1.79	1.15e-09		NA	NA	NA	NA
	rs3894194	17	38121993	GSDMA	A	G	1.18057	0.804962	0.891331	1.4e-10		1.10341	1.02301	1.19014	0.0107962
	GWAS, genome-wide association study; SNP, single nucletodie polymorphism; SSc, systemic sclerosis, CHR, chromosome; BP, base position (GRCh37);
	MAF, minor allele frequency; OR, odds ratio; CI, confidence interval; NA, not available
	* The data of LD SNP, 7:128590801 (r2 = 0.748), is presented for the present GWAS

## Sheet: Table S2
	Supplementary Table 2. SNPs significantly associated with SSc in Set 1
								Set 1 (N=2,789)						Set 2 (N=111,238)						Set 1+2 (N=114,027)
	CHR	BP	ID	TYPE	GENE	A1	A2	MAF (case ctrl)		OR	95% CI		P-value	MAF (case ctrl)		OR	95% CI		P-value	MAF (case ctrl)		OR	95% CI		P-value
	2	191943742	rs11889341	intronic	STAT4	T	C	0.383382	0.297367	1.53986	1.34546	1.76233	3.61721e-10	0.363316	0.298825	1.38107	1.2378	1.54093	7.56777e-09	0.373068	0.298798	1.44728	1.3381	1.56536	2.50768e-20
	SNP, single nucletodie polymorphism; SSc, systemic sclerosis, CHR, chromosome; BP, base position (GRCh37); MAF, minor allele frequency; OR, odds ratio; CI, confidence interval

## Sheet: Table S3
	Supplementary Table 3. SNPs significantly associated with SSc in Set 2
								Set 2 (N=111,238 for autosomes, N=110,738 for X chromosome)						Set 1 (N=2,789 for autosomes, N=2,776 for X chrmosome)						Set 1+2 (N=114,027 for autosomes, N=113,514 for X chromosome)
	CHR	BP	ID	TYPE	GENE	A1	A2	MAF (case ctrl)		OR	95% CI		P-value	MAF (case ctrl)		OR	95% CI		P-value	MAF (case ctrl)		OR	95% CI		P-value
	2	191953998	rs12612769	intronic	STAT4	C	A	0.356498	0.289706	1.41467	1.26585	1.58097	9.52716e-10	0.367999	0.29141	1.49	1.29886	1.70926	1.24778e-08	0.362088	0.289738	1.45458	1.34308	1.57534	3.29999e-20
	5	133639629	rs201638912	intronic	CDKL3	A	T	0.0242773	0.0112826	2.97219	2.02699	4.35815	2.43222e-08	0.0119326	0.0108392	1.19675	0.589649	2.42891	0.61896	0.0182778	0.0112744	2.00629	1.45235	2.77151	2.40312e-05
	6	144349790	rs142238322	intronic	PLAGL1	C	A	0.0304434	0.0138763	2.43399	1.77066	3.34581	4.26628e-08	0.0190122	0.0140732	1.27037	0.755355	2.13653	0.366947	0.0248879	0.01388	1.92138	1.48899	2.47933	5.15469e-07
	7	128573967	rs4728142	intergenic	KCP-IRF5	A	G	0.154899	0.104928	1.55518	1.34972	1.79192	1.00743e-09	0.128378	0.109469	1.19637	0.990632	1.44483	0.0625741	0.14201	0.105012	1.40544	1.2644	1.56222	2.83191e-10
	23	22506126	rs193119960	ncRNA_intronic	PTCHD1-AS	A	G	0.0181579	0.0139276	3.2187	2.21154	4.68453	1.027e-09	0.00885399	0.0123448	0.8296	0.408799	1.68355	0.6049	0.018158	0.0139276	1.4764	1.0836	2.0116	0.01356
	23	113304628	rs193221607	intergenic	XACT-HTR2C	T	G	0.00941297	0.00612559	12.5217	5.30087	29.5787	8.263e-09	0.00634491	0.00515841	2.9532	0.499363	17.465	0.2324	0.00941299	0.00612559	3.6893	1.82288	7.46672	0.0002843
	* nonsynonymous SNV HLA-DPB1:NM_002121:exon2:c.G315A:p.M105I
	SNP, single nucletodie polymorphism; SSc, systemic sclerosis, CHR, chromosome; BP, base position (GRCh37); MAF, minor allele frequency; OR, odds ratio; CI, confidence interval

## Sheet: Table S4
	Supplementary Table 4 95% credible sets identified by fine-mapping for the Japanese GWAS
	CHR	BP	SNP	Ref	Alt	MAF	P-value	PP	cPP
	1	161660696	rs6697139	G	T	0.0239447	4.9279e-11	0.364539	0.364539
	1	161658780	rs10917688	C	T	0.0239439	4.93536e-11	0.363715	0.728254
	1	161672474	rs113053770	C	T	0.0240572	8.7441e-11	0.179501	0.907756
	1	161658490	rs10917686	C	T	0.0238447	2.04047e-10	0.0552515	0.963007
	2	191943742	rs11889341	C	T	0.299728	2.50768e-20	0.611485	0.611485
	2	191953998	rs12612769	A	C	0.290644	3.29999e-20	0.344548	0.956033
	6	138196066	rs2230926	T	G	0.0713296	1.68341e-10	0.152686	0.152686
	6	138197506	rs5029949	A	G	0.0699928	1.65638e-10	0.145278	0.297964
	6	138195151	rs5029937	G	T	0.0699943	1.67188e-10	0.143065	0.441029
	6	138199055	rs3834310	A	AG	0.114175	4.26138e-10	0.137389	0.578418
	6	138195723	rs5029939	C	G	0.0700167	1.74299e-10	0.133698	0.712116
	6	138223490	rs9494893	G	T	0.0698552	2.36037e-10	0.0801546	0.79227
	6	138223489	rs9494892	G	T	0.0698471	2.37936e-10	0.0790613	0.871332
	6	138230038	rs148314165	G	GT	0.111323	1.25359e-09	0.0196696	0.891001
	6	138228520	rs9494894	T	C	0.0695777	5.49694e-10	0.0194815	0.910483
	6	138230040	rs200820567	T	A	0.0691007	5.57581e-10	0.0185327	0.929015
	6	138227364	rs7752903	T	G	0.0692514	6.31512e-10	0.0152135	0.944229
	6	138230389	rs7749323	G	A	0.0692514	6.31512e-10	0.0152135	0.959442
	7	128575797	rs764071296	T	TCTTAGCTATTGCTC	0.12697	2.74331e-10	0.346293	0.346293
	7	128577914	rs1167352630	CGCGGG	C	0.12745	2.76924e-10	0.343365	0.689658
	7	128573967	rs4728142	G	A	0.105475	2.83191e-10	0.209747	0.899405
	7	128576086	rs3757387	T	C	0.105026	4.31832e-10	0.099654	0.999059
	14	105408955	rs2819422	A	G	0.368512	2.72649e-11	0.0491509	0.0491509
	14	105406238	rs2819419	A	C	0.379727	2.77126e-11	0.0482903	0.0974412
	14	105405599	rs3742935	G	C	0.37972	2.78468e-11	0.0478568	0.145298
	14	105407208	rs11851053	T	C	0.379708	2.80873e-11	0.0470947	0.192393
	14	105407798	rs4465542	T	C	0.379708	2.80932e-11	0.0470763	0.239469
	14	105408030	rs9671643	A	G	0.368699	3.15864e-11	0.03737	0.276839
	14	105410827	rs28380382	C	T	0.368335	3.1779e-11	0.036933	0.313772
	14	105408315	rs28600075	T	C	0.368561	3.19209e-11	0.0366374	0.350409
	14	105410183	rs10438246	T	C	0.368543	3.20841e-11	0.03629	0.386699
	14	105409959	rs10152073	G	T	0.368281	3.2295e-11	0.0358384	0.422538
	14	105411700	rs4264326	A	G	0.368747	3.26378e-11	0.0351594	0.457697
	14	105410775	rs2819424	A	G	0.368556	3.31336e-11	0.0341774	0.491874
	14	105407031	rs11623422	A	G	0.368121	3.46211e-11	0.0314752	0.52335
	14	105413204	rs2582514	G	T	0.366036	3.48399e-11	0.0310302	0.55438
	14	105411781	rs10438247	G	A	0.367418	3.50421e-11	0.0307484	0.585128
	14	105412541	rs12433837	C	T	0.359293	3.50794e-11	0.0303785	0.615507
	14	105416010	rs2582511	T	C	0.361112	3.56182e-11	0.0295972	0.645104
	14	105388376	rs2841276	G	A	0.393976	3.64265e-11	0.0294	0.674504
	14	105391748	rs2841278	C	G	0.393472	3.9519e-11	0.0252421	0.699746
	14	105393556	rs2841280	G	C	0.392078	4.02543e-11	0.0243585	0.724105
	14	105394669	rs2841281	C	T	0.393245	4.04494e-11	0.0241648	0.74827
	14	105394859	rs2819469	G	A	0.39236	4.11992e-11	0.0233325	0.771602
	14	105408827	rs11850949	A	C	0.353587	4.10352e-11	0.0225133	0.794115
	14	105402418	rs10083490	C	T	0.36808	4.17198e-11	0.0222329	0.816348
	14	105405942	rs28454709	G	A	0.368012	4.30599e-11	0.0209593	0.837308
	14	105402994	rs10083374	T	C	0.368022	4.33987e-11	0.0206557	0.857963
	14	105403474	rs10149193	C	T	0.368022	4.33989e-11	0.0206555	0.878619
	14	105404384	rs1048257	T	C	0.368113	4.41684e-11	0.0199921	0.898611
	14	105386149	rs2841269	G	C	0.392985	4.61223e-11	0.0189125	0.917524
	14	105402786	rs10083496	G	A	0.367523	5.08988e-11	0.0153391	0.932863
	14	105408811	rs2819421	A	G	0.352471	5.10528e-11	0.0149687	0.947831
	14	105396693	rs1036713	G	C	0.368615	6.23181e-11	0.0105337	0.958365
	Lead SNPs are highlighted in bold
	GWAS, genome-wide association study; SNP, single nucletodie polymorphism; CHR, chromosome; BP, base position (GRCh37);
	Ref, reference allele; Alt, aleternatice allele; MAF, minor allele frequency; PP, posterior probability; cPP, cumulative posterior probability

## Sheet: Table S5
	Supplementary Table 5. Significantly associated gene-tissue/cell pairs identified by TWAS
	CELLL/TISSUE TYPE	GENE	CHR	BEST	BEST	EQTL.ID	EQTL.R2	EQTL.Z	EQTL	NSNP	NWGT	MODEL	MODEL	MODEL	TWAS.Z	TWAS.P *
				GWAS.ID	GWAS.Z				GWAS.Z				CV.R2	CV.PV
	Skin_Not_Sun_Exposed_Suprapubic	RP11-356I2.4	6	rs2230926	6.3	rs670369	0.193534	8.11	5.7003	456	5	lasso	0.195482	1.23e-17	5.75096	8.87e-09
	Adrenal_Gland	IRF5	7	rs4728142	6.308	rs4728142	0.170184	5.84	6.308	292	4	lasso	0.19985	3.76e-10	5.31607	1.06e-07
	Artery_Aorta	IRF5	7	rs4728142	6.308	rs4728142	0.28	8.91	6.308	292	6	lasso	0.29293	7.31e-22	5.36975	7.88e-08
	Artery_Tibial	IRF5	7	rs4728142	6.308	rs4728142	0.224307	9.91	6.308	292	3	enet	0.221	6.77e-23	6.04777	1.47e-09
	Breast_Mammary_Tissue	IRF5	7	rs4728142	6.308	rs4728142	0.0868	4.91	6.308	292	3	lasso	0.06494	2.71e-05	6.6068	3.93e-11
	Cells_Transformed_fibroblasts	IRF5	7	rs4728142	6.31	rs4728142	0.156	7.38	6.308	292	1	lasso	0.1552	9.22e-13	6.308	2.83e-10
	Colon_Sigmoid	IRF5	7	rs4728142	6.308	rs4728142	0.10946	4.97	6.308	292	2	lasso	0.10544	1.44e-06	6.2487	4.14e-10
	Colon_Transverse	IRF5	7	rs4728142	6.308	rs4728142	0.254205	7.94	6.308	292	2	lasso	0.245919	7.85e-17	6.28575	3.26e-10
	Esophagus_Mucosa	IRF5	7	rs4728142	6.308	rs4728142	0.241	9.38	6.308	292	14	enet	0.281062	1.75e-27	6.60089	4.09e-11
	Esophagus_Muscularis	IRF5	7	rs4728142	6.308	rs4728142	0.17445	8.06	6.308	292	2	lasso	0.17794	4.62e-16	6.26519	3.72e-10
	Liver	IRF5	7	rs4728142	6.308	rs4728142	0.241856	6.22	6.308	292	10	enet	0.276934	2.01e-12	5.6426	1.68e-08
	Lung	IRF5	7	rs4728142	6.308	rs4728142	0.142957	7.76	6.308	292	6	lasso	0.15765	4.28e-16	6.13621	8.45e-10
	Muscle_Skeletal	IRF5	7	rs4728142	6.308	rs4728142	0.0538	5.73	6.308	292	1	lasso	0.048307	5.34e-07	6.308	2.83e-10
	Nerve_Tibial	IRF5	7	rs4728142	6.308	rs4728142	0.198	8.69	6.308	292	4	lasso	0.20552	7.23e-20	5.65662	1.54e-08
	Pancreas	IRF5	7	rs4728142	6.308	rs4728142	0.151	6.42	6.308	292	4	enet	0.14427	3.79e-09	6.29541	3.07e-10
	Skin_Not_Sun_Exposed_Suprapubic	IRF5	7	rs4728142	6.308	rs4728142	0.172129	7.78	6.308	292	2	lasso	0.17699	5.61e-16	5.97827	2.26e-09
	Skin_Sun_Exposed_Lower_leg	IRF5	7	rs4728142	6.308	rs4728142	0.21	9.75	6.308	292	5	enet	0.224129	1.12e-24	5.58557	2.33e-08
	Stomach	IRF5	7	rs4728142	6.308	rs4728142	0.254514	7.9	6.308	292	1	lasso	0.2428	4.65e-16	6.308	2.83e-10
	Thyroid	IRF5	7	rs4728142	6.308	rs4728142	0.187935	8.95	6.308	292	7	enet	0.280708	2.11e-30	5.39584	6.82e-08
	Brain_Cerebellum	AHNAK2	14	rs11851053	-6.66	rs7147439	0.08613	5	-3.541	284	284	blup	0.15461	2.97e-07	-5.8744	4.24e-09
	Cells_Transformed_fibroblasts	AHNAK2	14	rs11851053	-6.66	rs10147672	0.018505	-4.03	-1.726	284	17	enet	0.0273	0.00242	6.20037	5.63e-10
	Nerve_Tibial	AHNAK2	14	rs11851053	-6.656	rs736066	0.135	-7.09	5.6606	284	3	lasso	0.141809	8.57e-14	-5.79994	6.63e-09
	Prostate	AHNAK2	14	rs11851053	-6.656	rs736066	0.245	-5.76	5.6606	284	3	lasso	0.25047	6.92e-10	-5.73361	9.83e-09
	Spleen	C14orf180	14	rs11851053	-6.656	rs10083490	0.103	-4.13	-6.5928	333	6	lasso	0.04624	0.0054	6.3011	2.96e-10
	Perihperal blood	GPR132	14	rs2819419	-6.658	rs2582513	0.0205	3.25	-6.22	128	2	lasso	0.028692	0.0522	-5.89234	3.81e-09
	Spleen	PLD4	14	rs11851053	-6.656	rs11851053	0.0764	-3.91	-6.656	289	10	lasso	0.04438	0.0063	7.5019	6.29e-14
	CHR, chromosome; EQTL, expression quantitative loci; TWAS, tissue-wide association study; Threshold of significance P=1.79×10-8 (0.05/279,331)
	BEST.GWAS.ID, rsID of the most significant GWAS SNP in the locus; BEST.GWAS.Z, Zscore of the most significant GWAS SNP in the locus; EQTL.ID, rsID of the best eQTL in the locus; EQTL.R2, cross-validation R2 of the best eQTL in the locus;
	EQTL.Z, Z-score of the best eQTL in the locus; EQTL.GWAS.Z, GWAS Z-score for eQTL; NSNP, Number of SNPs in the locus; MODEL, the best performing model; MODELCV.R2, cross-validation R2 of the best performing model;
	MODELCV.PV, cross-validation P value of the best performing model; TWAS.Z, TWAS Z-score; TWAS.P, TWAS P value.

## Sheet: Table S6
	Tables S6. The output of gene set analyses by FUMA
	Category	GeneSet	N_genes	N_overlap	p	adjP	genes	link
	GWAScatalog	Autism spectrum disorder of schizophrenia	735	42	3.59895e-29	6.53209e-26	LRRC16A:SCGN:SLC17A2:HIST1H4H:BTN3A2:BTN2A2:BTN3A3:BTN2A1:BTN1A1:HMGN4:ABT1:HIST1H2BJ:HIST1H2AG:HIST1H2BK:HIST1H4I:HIST1H2AH:OR2W1:OR5V1:OR12D3:OR12D2:OR11A1:OR10C1:OR2H1:MAS1L:GABBR1:OR2H2:VPS52:RPS18:B3GALT4:WDR46:PFDN6:RGL2:TAPBP:ZBTB22:DAXX:KIFC1:PHF1:CUTA:SYNGAP1:ZBTB9:BAK1:GGNBP1
	GWAScatalog	Chronic obstructive pulmonoray disease or resting heart rate (pleiotropy)	74	12	1.79479e-14	1.62877e-11	KIFC1:PHF1:CUTA:SYNGAP1:ZBTB9:BAK1:GGNBP1:ITPR3:UQCC2:IP6K3:LEMD2:MLN
	GWAScatalog	Systemic sclerosis (anti-cnetromere-postivie)	7	5	1.33835e-10	8.09702e-08	FCGR2C:FCGR3B:STAT4:IRF5:TNPO3
	GWAScatalog	Systemic lupus erythematosus	348	16	2.85254e-10	1.29434e-07	FCGR2A:FCGR3A:FCGR2B:FCGR2C:FCGR3B:AHNAK2:STAT1:STAT4:LRRC16A:TCP11:SCUBE3:OLIG3:TNFAIP3:PERP:IRF5:TNPO3
	GWAScatalog	Limited cutaneous systemic sclerosis	20	6	1.32607e-09	4.81365e-07	FCGR2C:FCGR3B:STAT1:STAT4:IRF5:TNPO3
	GWAScatalog	Cerebrospinal fluid t-tau levels in normal cognition	22	6	2.52799e-09	7.64718e-07	RPS26P49:RPS2P4:CEP170B:PLD4:AHNAK2:CDCA4
	GWAScatalog	Cerebrospinal fluid t-tau levels	27	6	9.78847e-09	2.53801e-06	RPS26P49:RPS2P4:CEP170B:PLD4:AHNAK2:CDCA4
	GWAScatalog	Hodgkin's lymphoma	28	6	1.23977e-08	2.81272e-06	ITPR3:UQCC2:IP6K3:MYB:OLIG3:TNFAIP3
	GWAScatalog	Lung cancer in ever smokers	151	10	2.24646e-08	4.53037e-06	LRRC16A:SCGN:HIST1H4H:BTN3A2:BTN2A1:HMGN4:ABT1:GABBR1:DAXX:KIFC1
	GWAScatalog	Systemic seropositive rheumatic diseases (Systemic sclerosis, Sytemic lupus erythematosus, Rheumatoid arthritis, Idiopathic inflammatory myopathies)	18	5	5.18243e-08	9.40611e-06	NAB1:STAT4:TNFAIP3:IRF5:TNPO3
	GWAScatalog	Systemic sclerosis	64	7	9.72594e-08	1.60478e-05	FCGR2C:ATF6:STAT1:STAT4:TNFAIP3:IRF5:TNPO3
	GWAScatalog	Regular attendant at a gym or sports club	42	6	1.61282e-07	2.43939e-05	ITPR3:UQCC2:IP6K3:LEMD2:MLN:GRM4
	GWAScatalog	Systemic sclerosis or rheumatoid arthritis	11	4	3.59439e-07	5.01833e-05	ICAM3:TNFAIP3:IRF5:TNPO3
	GWAScatalog	Lung cancer (SNP x SNP intreraction)	4	3	7.79217e-07	0.00010102	HIBCH:INPP1:STAT1
	GWAScatalog	Primary biliary cholangitis	105	7	2.91231e-06	0.00034462	NAB1:STAT1:STAT4:OLIG3:TNFAIP3:IRF5:TNPO3
	GWAScatalog	Iron status biomarkers (total iron binding capacity)	39	5	3.15241e-06	0.00034462	SLC40A1:LRRC16A:SCGN:SLC17A2:HIST1H2BJ
	GWAScatalog	Response to cyclophophamide in systemic lupus nephritis	18	4	3.22784e-06	0.00034462	FCGR2B:FCGR3B:RPL31P11:FCRLA
	GWAScatalog	Rheumatoid arthritis (ACPA-positive)	72	6	4.1535e-06	0.000418811	FCGR2A:ICAM3:STAT4:OLIG3:TNFAIP3:IRF5
	GWAScatalog	Rheumatoid arthritis	216	9	5.52492e-06	0.000527775	FCGR2A:FCGR2B:PLD4:AHNAK2:ICAM3:STAT4:OLIG3:TNFAIP3:IRF5
	GWAScatalog	Systemic lupus erythematosus and Systemic sclerosis	21	4	6.22722e-06	0.00053821	STAT4:TNFAIP3:IRF5:TNPO3
	GWAScatalog	Iron status biomarkers	21	4	6.22722e-06	0.00053821	LRRC16A:SCGN:BTN1A1:HIST1H2BJ
	GWAScatalog	Inflammatory bowel diesase	730	16	6.89196e-06	0.000568587	ITLN2:F11R:USF1:ARHGAP30:FCGR2A:HSPA6:FCGR3A:FCGR2B:FCGR3B:FCRLA:DUSP12:ICAM3:STAT1:STAT4:PACSIN1:TNFAIP3
	GWAScatalog	Phosphorus levels	22	4	7.57632e-06	0.00059787	ITPR3:IP6K3:LEMD2:MLN
	GWAScatalog	Functional impairment in major depressive disorder, bipolar disorder, and schizophrenia	8	3	1.07222e-05	0.000810869	FCGR2A:HSPA6:FCGR3A
	GWAScatalog	Body mass index	1365	22	1.77582e-05	0.00128925	DDR2:BTN1A1:OR5V1:VPS52:RPS18:B3GALT4:WDR46:KIFC1:PHF1:CUTA:SYNGAP1:BAK1:GGNBP1:ITPR3:UQCC2:IP6K3:LEMD2:MLN:GRM4:NUDT3:PACSIN1:IFNGR1
	GWAScatalog	Daytime sleep phenotypes	259	9	2.34913e-05	0.00163987	HIBCH:INPP1:MFSD6:TMEM194B:NAB1:OR2J1:OR5V1:OR12D3:OR12D2
	GWAScatalog	Blood protein levels	1935	27	2.47933e-05	0.00166666	FCGR2A:HSPA6:RPS23P10:FCGR3A:FCGR2B:FCGR3B:RPL31P11:FCRLA:7SK:7SK:CD300E:LGALS3BP:HIBCH:7SK:7SK:BTN3A3:BTN2A1:BTN1A1:HMGN4:ABT1:OR2W1:OR5V1:OR12D3:OR11A1:OR10C1:OR2H1:MAS1L:GABBR1:TAPBP:MLN:RN7SK:7SK:7SK:7SK
	GWAScatalog	Lung cancer	214	8	4.0083e-05	0.00259824	LRRC16A:HIST1H4H:ABT1:GABBR1:DAXX:KIFC1:ZBTB9:BAK1
	GWAScatalog	Primary biliary cirrhosis	48	4	0.000178986	0.0112021	STAT1:STAT4:IRF5:TNPO3
	GWAScatalog	Sjogren's syndrome	50	4	0.000209924	0.0127004	STAT4:TNFAIP3:IRF5:TNPO3
	GWAScatalog	Ulcerative colitis	465	10	0.000437447	0.0256118	FCGR2A:HSPA6:FCGR3A:FCGR2B:FCGR2C:FCGR3B:DUSP12:IRF5:TNPO3:TSPAN33
	GWAScatalog	Social communication problems	29	3	0.000639171	0.036253	OR2W1:OR5V1:OR12D3
	GWAScatalog	Helicobacter pylori serologic status	7	2	0.000697615	0.0372403	FCGR2A:HSPA6
	GWAScatalog	Intrinsic epigenetic age acceleration	7	2	0.000697615	0.0372403	LRRC16A:SCGN
	GWAScatalog	Response to antidepressantes and depression	8	2	0.000926579	0.0480498	NRF1:UBE2H
	Chemical_and_Genetic_pertubation	CHEN_LIVER_METABOLISM_QTL_CIS	92	8	7.15614e-08	0.000236296	F11R:USF1:FCER1G:PCP4L1:SDHC:FCGR2B:DUSP12:DDR2	http://www.gsea-msigdb.org/gsea/msigdb/cards/CHEN_LIVER_METABOLISM_QTL_CIS
	Chemical_and_Genetic_pertubation	LIAN_LIPA_TARGETS_6M	76	6	5.70039e-06	0.00536745	FCER1G:FCGR2A:FCGR2B:FCGR3B:MS4A7:SLC40A1	http://www.gsea-msigdb.org/gsea/msigdb/cards/LIAN_LIPA_TARGETS_6M
	Chemical_and_Genetic_pertubation	ACEVEDO_LIVER_CANCER_WITH_H3K9ME3_DN	117	7	5.98243e-06	0.00536745	HIST1H4H:HMGN4:HIST1H2BJ:HIST1H2AG:HIST1H2BK:HIST1H4I:HIST1H2AH	http://www.gsea-msigdb.org/gsea/msigdb/cards/ACEVEDO_LIVER_CANCER_WITH_H3K9ME3_DN
	Chemical_and_Genetic_pertubation	FIGUEROA_AML_METHYLATION_CLUSTER_1_DN	45	5	6.50206e-06	0.00536745	AHNAK2:HIST1H2BJ:HIST1H2AG:VPS52:RPS18	http://www.gsea-msigdb.org/gsea/msigdb/cards/FIGUEROA_AML_METHYLATION_CLUSTER_1_DN
	Chemical_and_Genetic_pertubation	LIAN_LIPA_TARGETS_3M	61	5	2.93536e-05	0.0166357	FCER1G:FCGR2A:FCGR2B:MS4A7:SLC40A1	http://www.gsea-msigdb.org/gsea/msigdb/cards/LIAN_LIPA_TARGETS_3M
	Chemical_and_Genetic_pertubation	RUAN_RESPONSE_TO_TNF_UP	11	3	3.11861e-05	0.0166357	STAT1:OR2H2:IFNGR1	http://www.gsea-msigdb.org/gsea/msigdb/cards/RUAN_RESPONSE_TO_TNF_UP
	Chemical_and_Genetic_pertubation	TAKEDA_TARGETS_OF_NUP98_HOXA9_FUSION_8D_UP	156	7	3.87702e-05	0.0166357	PLD4:LGALS3BP:SLC40A1:STAT1:MAP7:IL22RA2:ALDH1A1	http://www.gsea-msigdb.org/gsea/msigdb/cards/TAKEDA_TARGETS_OF_NUP98_HOXA9_FUSION_8D_UP
	Chemical_and_Genetic_pertubation	BOGNI_TREATMENT_RELATED_MYELOID_LEUKEMIA_DN	33	4	4.03044e-05	0.0166357	BTN3A3:VPS52:RGL2:MYB	http://www.gsea-msigdb.org/gsea/msigdb/cards/BOGNI_TREATMENT_RELATED_MYELOID_LEUKEMIA_DN
	Chemical_and_Genetic_pertubation	BENPORATH_MYC_MAX_TARGETS	774	15	5.49574e-05	0.0201633	ATF6:GPR132:BTN2A1:ABT1:HIST1H2BJ:HIST1H2AG:HIST1H4I:SLC39A7:VPS52:WDR46:RGL2:DAXX:CUTA:MAP3K5:IFNGR1	http://www.gsea-msigdb.org/gsea/msigdb/cards/BENPORATH_MYC_MAX_TARGETS
	Chemical_and_Genetic_pertubation	WANG_ESOPHAGUS_CANCER_VS_NORMAL_UP	118	6	7.01424e-05	0.023161	FCER1G:BTN3A3:BAK1:IFNGR1:TNFAIP3:CALU	http://www.gsea-msigdb.org/gsea/msigdb/cards/WANG_ESOPHAGUS_CANCER_VS_NORMAL_UP
	Chemical_and_Genetic_pertubation	CHARAFE_BREAST_CANCER_LUMINAL_VS_BASAL_DN	454	11	8.08135e-05	0.0232593	INPP1:NAB1:STAT4:MYO1B:NABP1:BTN3A2:BTN3A3:IFNGR1:TNFAIP3:PERP:CCDC28A	http://www.gsea-msigdb.org/gsea/msigdb/cards/CHARAFE_BREAST_CANCER_LUMINAL_VS_BASAL_DN
	Chemical_and_Genetic_pertubation	RUAN_RESPONSE_TO_TNF_TROGLITAZONE_UP	15	3	8.4528e-05	0.0232593	STAT1:OR2H2:IFNGR1	http://www.gsea-msigdb.org/gsea/msigdb/cards/RUAN_RESPONSE_TO_TNF_TROGLITAZONE_UP
	Chemical_and_Genetic_pertubation	MISSIAGLIA_REGULATED_BY_METHYLATION_UP	126	6	0.000100874	0.0256221	STAT1:HIST1H2BK:IFNGR1:TNFAIP3:PERP:UBE2H	http://www.gsea-msigdb.org/gsea/msigdb/cards/MISSIAGLIA_REGULATED_BY_METHYLATION_UP
	Chemical_and_Genetic_pertubation	TARTE_PLASMA_CELL_VS_PLASMABLAST_UP	393	10	0.000114569	0.0268405	FCER1G:MPZ:FCGR3B:DDR2:BTN2A2:HIST1H4I:RPS18:MLN:TNFAIP3:ALDH1A1	http://www.gsea-msigdb.org/gsea/msigdb/cards/TARTE_PLASMA_CELL_VS_PLASMABLAST_UP
	Chemical_and_Genetic_pertubation	NAKAYAMA_SOFT_TISSUE_TUMORS_PCA1_UP	82	5	0.000121929	0.0268405	FCGR2A:HSPA6:FCGR3A:FCGR2B:GABBR1	http://www.gsea-msigdb.org/gsea/msigdb/cards/NAKAYAMA_SOFT_TISSUE_TUMORS_PCA1_UP
	Chemical_and_Genetic_pertubation	BROWNE_HCMV_INFECTION_48HR_DN	482	11	0.000136535	0.0268405	DDR2:CEP170B:MTA1:LGALS3BP:STAT1:BTN3A2:HIST1H4I:OR2H2:MLN:MYB:CETN2	http://www.gsea-msigdb.org/gsea/msigdb/cards/BROWNE_HCMV_INFECTION_48HR_DN
	Chemical_and_Genetic_pertubation	BURTON_ADIPOGENESIS_6	191	7	0.000138185	0.0268405	SDHC:HIBCH:NABP1:AGPAT3:OR2H2:IMPDH1:ALDH1A1	http://www.gsea-msigdb.org/gsea/msigdb/cards/BURTON_ADIPOGENESIS_6
	Chemical_and_Genetic_pertubation	SMITH_LIVER_CANCER	47	4	0.000164819	0.0302352	SDHC:PFDN6:TNFAIP3:ALDH1A1	http://www.gsea-msigdb.org/gsea/msigdb/cards/SMITH_LIVER_CANCER
	Chemical_and_Genetic_pertubation	RODWELL_AGING_KIDNEY_UP	497	11	0.00017798	0.0309311	ARHGAP30:FCER1G:MS4A7:SLC40A1:BTN3A3:GABBR1:WDR46:TAPBP:ITPR3:RPS10:CALU	http://www.gsea-msigdb.org/gsea/msigdb/cards/RODWELL_AGING_KIDNEY_UP
	Chemical_and_Genetic_pertubation	ACEVEDO_LIVER_CANCER_WITH_H3K27ME3_DN	215	7	0.000284996	0.0470529	TMEM121:HIST1H4H:HIST1H2BJ:HIST1H2AG:HIST1H2BK:HIST1H4I:HIST1H2AH	http://www.gsea-msigdb.org/gsea/msigdb/cards/ACEVEDO_LIVER_CANCER_WITH_H3K27ME3_DN
	GO_cc	GO_DNA_PACKAGING_COMPLEX	113	6	5.50945e-05	0.0334223	HIST1H4H:HIST1H2BJ:HIST1H2AG:HIST1H2BK:HIST1H4I:HIST1H2AH	http://www.gsea-msigdb.org/gsea/msigdb/cards/GO_DNA_PACKAGING_COMPLEX
	GO_cc	GO_EXTERNAL_SIDE_OF_PLASMA_MEMBRANE	368	10	6.67778e-05	0.0334223	FCER1G:FCGR3A:FCGR2B:IGHG4:BTN3A2:BTN2A2:BTN3A3:BTN2A1:BTN1A1:MAP3K5	http://www.gsea-msigdb.org/gsea/msigdb/cards/GO_EXTERNAL_SIDE_OF_PLASMA_MEMBRANE
	GO_cc	GO_CHROMATIN	557	12	0.000116695	0.0389373	USF1:MTA1:STAT1:HIST1H4H:HMGN4:HIST1H2BJ:HIST1H2AG:HIST1H2BK:HIST1H4I:HIST1H2AH:RING1:LEMD2	http://www.gsea-msigdb.org/gsea/msigdb/cards/GO_CHROMATIN
	Hallmark_gene_sets	HALLMARK_INTERFERON_GAMMA_RESPONSE	200	6	0.00118312	0.029578	LGALS3BP:STAT1:STAT4:TAPBP:TNFAIP3:IRF5	http://www.gsea-msigdb.org/gsea/msigdb/cards/HALLMARK_INTERFERON_GAMMA_RESPONSE
	Hallmark_gene_sets	HALLMARK_ALLOGRAFT_REJECTION	200	6	0.00118312	0.029578	FCGR2B:AKT1:STAT1:STAT4:TAPBP:IFNGR1	http://www.gsea-msigdb.org/gsea/msigdb/cards/HALLMARK_ALLOGRAFT_REJECTION
	Immunologic_signatures	GSE3337_4H_VS_16H_IFNG_IN_CD8POS_DC_DN	200	9	2.95345e-06	0.0143892	FCER1G:PLD4:LGALS3BP:GABBR1:HSD17B8:RGL2:BAK1:NUDT3:MAP3K5	http://www.gsea-msigdb.org/gsea/msigdb/cards/GSE3337_4H_VS_16H_IFNG_IN_CD8POS_DC_DN
	Immunologic_signatures	GSE21546_SAP1A_KO_VS_SAP1A_KO_AND_ELK1_KO_DP_THYMOCYTES_DN	199	8	2.38978e-05	0.0301704	FCRLA:CEP170B:CDCA4:NABP1:MAP7:TNFAIP3:IRF5:CEP41	http://www.gsea-msigdb.org/gsea/msigdb/cards/GSE21546_SAP1A_KO_VS_SAP1A_KO_AND_ELK1_KO_DP_THYMOCYTES_DN
	Immunologic_signatures	GSE22886_CTRL_VS_LPS_24H_DC_DN	200	8	2.47704e-05	0.0301704	CDCA4:LGALS3BP:STAT1:HIST1H4H:BTN3A2:BTN3A3:B3GALT4:TNFAIP3	http://www.gsea-msigdb.org/gsea/msigdb/cards/GSE22886_CTRL_VS_LPS_24H_DC_DN
	Immunologic_signatures	GSE22140_HEALTHY_VS_ARTHRITIC_GERMFREE_MOUSE_CD4_TCELL_UP	200	8	2.47704e-05	0.0301704	FCER1G:LGALS3BP:STAT1:BTN3A3:HMGN4:TAPBP:NUDT3:PEX7	http://www.gsea-msigdb.org/gsea/msigdb/cards/GSE22140_HEALTHY_VS_ARTHRITIC_GERMFREE_MOUSE_CD4_TCELL_UP
	Cancer_modules	MODULE_84	541	14	4.10231e-06	0.0017681	FCER1G:FCGR2A:HSPA6:FCGR3A:FCGR2B:MS4A7:ICAM3:SLC40A1:STAT1:STAT4:HIST1H2BK:ITPR3:IFNGR1:TNFAIP3	http://www.gsea-msigdb.org/gsea/msigdb/cards/MODULE_84
	Cancer_modules	MODULE_5	433	12	1.02833e-05	0.00221605	FCER1G:FCGR2A:FCGR3A:FCGR3B:STAT1:MYO1B:SLC39A7:ITPR3:IFNGR1:TNFAIP3:CALU:ALDH1A1	http://www.gsea-msigdb.org/gsea/msigdb/cards/MODULE_5
	Cancer_modules	MODULE_45	576	13	3.78904e-05	0.00544359	FCER1G:FCGR2A:HSPA6:FCGR3A:FCGR2B:FCGR3B:ICAM3:STAT1:STAT4:BTN3A2:HIST1H2BK:IFNGR1:TNFAIP3	http://www.gsea-msigdb.org/gsea/msigdb/cards/MODULE_45
	Cancer_modules	MODULE_424	18	3	0.000149648	0.0152525	FCER1G:FCGR2A:FCGR3A	http://www.gsea-msigdb.org/gsea/msigdb/cards/MODULE_424
	Cancer_modules	MODULE_478	19	3	0.000176943	0.0152525	FCER1G:FCGR2A:FCGR3A	http://www.gsea-msigdb.org/gsea/msigdb/cards/MODULE_478
	Cancer_modules	MODULE_168	22	3	0.000277605	0.0156329	HIST1H2BJ:HIST1H2BK:MAP7	http://www.gsea-msigdb.org/gsea/msigdb/cards/MODULE_168
	Cancer_modules	MODULE_222	22	3	0.000277605	0.0156329	HIST1H2BJ:HIST1H2BK:MAP7	http://www.gsea-msigdb.org/gsea/msigdb/cards/MODULE_222
	Cancer_modules	MODULE_111	153	6	0.00029017	0.0156329	MPZ:FCGR2A:FCGR2B:STAT4:GRM4:IRF5	http://www.gsea-msigdb.org/gsea/msigdb/cards/MODULE_111
	Cancer_modules	MODULE_2	380	9	0.000423662	0.0202887	MPZ:HSPA6:GLS:GABBR1:ITPR3:IFNGR1:TNFAIP3:CALU:ALDH1A1	http://www.gsea-msigdb.org/gsea/msigdb/cards/MODULE_2
	Cancer_modules	MODULE_98	393	9	0.000539302	0.0232439	AKT1:MTA1:STAT1:HMGN4:HIST1H2BK:TAF11:MAP7:CALU:NRF1	http://www.gsea-msigdb.org/gsea/msigdb/cards/MODULE_98
	Positional_gene_sets	chr7q32	74	32	1.86783e-52	5.58481e-50	RBM28:RNU7-27P:IMPDH1:RNU7-54P:HILPDA:METTL2B:IMP3P2:RNA5SP242:RNA5SP243:FAM71F1:CALU:FLNC:RP11-309L24.2:KCP:IRF5:TNPO3:RN7SL306P:ODCP:TPI1P2:CYCSP20:TSPAN33:SMO:STRIP2:SNRPGP3:RNU1-72P:SMKR1:NRF1:RNA5SP244:UBE2H:RNA5SP245:CEP41:KLF14	http://www.gsea-msigdb.org/gsea/msigdb/cards/chr7q32
	Positional_gene_sets	chr1q23	193	29	2.18832e-32	3.27154e-30	ITLN2:F11R:USF1:ARHGAP30:FCER1G:NR1I3:PCP4L1:MPZ:SDHC:RRM2P2:RNU6-481P:FCGR2A:HSPA6:RPS23P10:FCGR3A:FCGR2B:FCGR2C:HSPA7:RPS23P9:FCGR3B:RPL31P11:FCRLA:FCRLB:RN7SL466P:DUSP12:ATF6:MIR4654:UHMK1:DDR2	http://www.gsea-msigdb.org/gsea/msigdb/cards/chr1q23
	Positional_gene_sets	chr6q23	94	21	1.39796e-27	1.3933e-25	MYB:MYB-AS1:MTFR2:MAP7:MAP3K5:RNA5SP219:PEX7:SLC35D3:RPL35AP3:IL20RA:IL22RA2:IFNGR1:OLIG3:BTF3L4P3:RP11-356I2.1:RP11-356I2.4:TNFAIP3:RP11-10J5.1:PERP:KIAA1244:PBOV1	http://www.gsea-msigdb.org/gsea/msigdb/cards/chr6q23
	Positional_gene_sets	chr6p21	429	33	4.5707e-27	3.4166e-25	SLC39A7:HSD17B8:RING1:VPS52:RPS18:B3GALT4:WDR46:PFDN6:RGL2:TAPBP:ZBTB22:DAXX:KIFC1:PHF1:CUTA:SYNGAP1:ZBTB9:BAK1:GGNBP1:ITPR3:UQCC2:IP6K3:LEMD2:MLN:GRM4:NUDT3:RPS10-NUDT3:RPS10:PACSIN1:TAF11:ANKS1A:TCP11:SCUBE3	http://www.gsea-msigdb.org/gsea/msigdb/cards/chr6p21
	Positional_gene_sets	chr6p22	318	27	2.09382e-23	1.25211e-21	LRRC16A:SCGN:SLC17A2:HIST1H4H:BTN3A2:BTN2A2:BTN3A3:BTN2A1:BTN1A1:HMGN4:ABT1:HIST1H2BJ:HIST1H2AG:HIST1H2BK:HIST1H4I:HIST1H2AH:OR2W1:OR2J1:OR5V1:OR12D3:OR12D2:OR11A1:OR10C1:OR2H1:MAS1L:GABBR1:OR2H2	http://www.gsea-msigdb.org/gsea/msigdb/cards/chr6p22
	Positional_gene_sets	chr2q32	85	17	1.20514e-21	6.00562e-20	SLC40A1:HNRNPCP2:HIBCH:INPP1:MFSD6:TMEM194B:RN7SKP179:NAB1:GLS:STAT1:STAT4:RNU6-959P:HMGB1P27:MYO1B:RNU6-1045P:NABP1:TMEFF2	http://www.gsea-msigdb.org/gsea/msigdb/cards/chr2q32
	Positional_gene_sets	chr14q32	501	24	3.2036e-15	1.36839e-13	SNORD112:SNORD112:SNORD112:SNORD112:SNORD112:SNORD112:SNORD112:SNORD112:SNORD112:SNORD112:SNORD112:SNORD112:SNORD112:SNORD112:SNORD112:SNORD112:SNORD112:SNORD112:SNORD112:SNORD112:SNORD112:SNORD112:SNORD112:SIVA1:AKT1:LINC00638:RPS26P49:RPS2P4:CEP170B:PLD4:AHNAK2:CDCA4:GPR132:NUDT14:BTBD6:PACS2:MTA1:CRIP2:TMEM121:ELK2BP:IGHG4:IGHJ4:IGHD3-3:IGHD2-2:KIAA0125:IGHD1-1:SNORD112:SNORD112:SNORD112:SNORD…	http://www.gsea-msigdb.org/gsea/msigdb/cards/chr14q32
	Positional_gene_sets	chr6q24	63	5	3.43549e-05	0.00128401	MARCKSL1P2:HEBP2:MIR3145:CCDC28A:ECT2L	http://www.gsea-msigdb.org/gsea/msigdb/cards/chr6q24
	GO_mf	GO_IGG_BINDING	11	6	1.65133e-11	2.71644e-08	FCER1G:FCGR2A:FCGR3A:FCGR2B:FCGR2C:FCGR3B	http://www.gsea-msigdb.org/gsea/msigdb/cards/GO_IGG_BINDING
	GO_mf	GO_IMMUNOGLOBULIN_BINDING	23	6	3.40364e-09	2.7995e-06	FCER1G:FCGR2A:FCGR3A:FCGR2B:FCGR2C:FCGR3B	http://www.gsea-msigdb.org/gsea/msigdb/cards/GO_IMMUNOGLOBULIN_BINDING
	GO_mf	GO_MOLECULAR_TRANSDUCER_ACTIVITY	1529	24	1.11369e-05	0.00610671	FCER1G:NR1I3:FCGR2B:FCGR2C:DDR2:GPR132:BTN1A1:OR2W1:OR2J1:OR5V1:OR12D3:OR12D2:OR11A1:OR10C1:OR2H1:MAS1L:GABBR1:OR2H2:GRM4:IL20RA:IL22RA2:IFNGR1:TNPO3:SMO	http://www.gsea-msigdb.org/gsea/msigdb/cards/GO_MOLECULAR_TRANSDUCER_ACTIVITY
	GO_mf	GO_TRANSMEMBRANE_SIGNALING_RECEPTOR_ACTIVITY	1263	21	1.76485e-05	0.00725796	FCER1G:FCGR2B:FCGR2C:DDR2:GPR132:OR2W1:OR2J1:OR5V1:OR12D3:OR12D2:OR11A1:OR10C1:OR2H1:MAS1L:GABBR1:OR2H2:GRM4:IL20RA:IL22RA2:IFNGR1:SMO	http://www.gsea-msigdb.org/gsea/msigdb/cards/GO_TRANSMEMBRANE_SIGNALING_RECEPTOR_ACTIVITY
	Cancer_gene_neighborhoods	GCM_HMGA2	123	8	6.78575e-07	0.000122923	FCGR2A:FCGR2B:STAT4:SLC17A2:RING1:GRM4:IRF5:NRF1	http://www.gsea-msigdb.org/gsea/msigdb/cards/GCM_HMGA2
	Cancer_gene_neighborhoods	GCM_FANCC	126	8	8.15257e-07	0.000122923	SDHC:FCGR2A:FCGR2B:SLC17A2:RING1:GRM4:TAF11:NRF1	http://www.gsea-msigdb.org/gsea/msigdb/cards/GCM_FANCC
	Cancer_gene_neighborhoods	GCM_TEC	32	5	1.13977e-06	0.000122923	FCGR2A:SLC17A2:RING1:GRM4:NRF1	http://www.gsea-msigdb.org/gsea/msigdb/cards/GCM_TEC
	Cancer_gene_neighborhoods	GCM_SUPT4H1	58	6	1.15151e-06	0.000122923	SDHC:FCGR2A:FCGR2B:RING1:GRM4:NRF1	http://www.gsea-msigdb.org/gsea/msigdb/cards/GCM_SUPT4H1
	Cancer_gene_neighborhoods	GCM_BNIP1	78	5	9.61338e-05	0.00820982	SDHC:FCGR2A:RING1:GRM4:IRF5	http://www.gsea-msigdb.org/gsea/msigdb/cards/GCM_BNIP1
	Cancer_gene_neighborhoods	GCM_PRKAG1	50	4	0.000209924	0.0149396	FCGR2B:RING1:GRM4:TAF11	http://www.gsea-msigdb.org/gsea/msigdb/cards/GCM_PRKAG1
	Cancer_gene_neighborhoods	GCM_SMARCD1	105	5	0.000387239	0.0236216	FCGR2A:SLC17A2:RING1:GRM4:TAF11	http://www.gsea-msigdb.org/gsea/msigdb/cards/GCM_SMARCD1
	Cancer_gene_neighborhoods	GCM_RING1	112	5	0.000520602	0.0277871	SDHC:FCGR2A:RING1:GRM4:NRF1	http://www.gsea-msigdb.org/gsea/msigdb/cards/GCM_RING1
	Cancer_gene_neighborhoods	GCM_BECN1	68	4	0.000684039	0.0324538	SDHC:FCGR2B:RING1:GRM4	http://www.gsea-msigdb.org/gsea/msigdb/cards/GCM_BECN1
	Cancer_gene_neighborhoods	GCM_DPF2	32	3	0.000856529	0.0365738	SDHC:RING1:GRM4	http://www.gsea-msigdb.org/gsea/msigdb/cards/GCM_DPF2
	Curated_gene_sets	KEGG_SYSTEMIC_LUPUS_ERYTHEMATOSUS	135	11	4.84327e-10	2.66428e-06	FCGR2A:FCGR3A:FCGR2B:FCGR2C:FCGR3B:HIST1H4H:HIST1H2BJ:HIST1H2AG:HIST1H2BK:HIST1H4I:HIST1H2AH	http://www.gsea-msigdb.org/gsea/msigdb/cards/KEGG_SYSTEMIC_LUPUS_ERYTHEMATOSUS
	Curated_gene_sets	REACTOME_BUTYROPHILIN_BTN_FAMILY_INTERACTIONS	12	5	4.92897e-09	1.35571e-05	BTN3A2:BTN2A2:BTN3A3:BTN2A1:BTN1A1	http://www.gsea-msigdb.org/gsea/msigdb/cards/REACTOME_BUTYROPHILIN_BTN_FAMILY_INTERACTIONS
	Curated_gene_sets	CHEN_LIVER_METABOLISM_QTL_CIS	92	8	7.15614e-08	0.00013122	F11R:USF1:FCER1G:PCP4L1:SDHC:FCGR2B:DUSP12:DDR2	http://www.gsea-msigdb.org/gsea/msigdb/cards/CHEN_LIVER_METABOLISM_QTL_CIS
	Curated_gene_sets	REACTOME_HDACS_DEACETYLATE_HISTONES	91	7	1.10947e-06	0.00152579	MTA1:HIST1H4H:HIST1H2BJ:HIST1H2AG:HIST1H2BK:HIST1H4I:HIST1H2AH	http://www.gsea-msigdb.org/gsea/msigdb/cards/REACTOME_HDACS_DEACETYLATE_HISTONES
	Curated_gene_sets	KEGG_LEISHMANIA_INFECTION	70	6	3.51954e-06	0.00387219	FCGR2A:FCGR3A:FCGR2C:FCGR3B:STAT1:IFNGR1	http://www.gsea-msigdb.org/gsea/msigdb/cards/KEGG_LEISHMANIA_INFECTION
	Curated_gene_sets	LIAN_LIPA_TARGETS_6M	76	6	5.70039e-06	0.00447098	FCER1G:FCGR2A:FCGR2B:FCGR3B:MS4A7:SLC40A1	http://www.gsea-msigdb.org/gsea/msigdb/cards/LIAN_LIPA_TARGETS_6M
	Curated_gene_sets	ACEVEDO_LIVER_CANCER_WITH_H3K9ME3_DN	117	7	5.98243e-06	0.00447098	HIST1H4H:HMGN4:HIST1H2BJ:HIST1H2AG:HIST1H2BK:HIST1H4I:HIST1H2AH	http://www.gsea-msigdb.org/gsea/msigdb/cards/ACEVEDO_LIVER_CANCER_WITH_H3K9ME3_DN
	Curated_gene_sets	FIGUEROA_AML_METHYLATION_CLUSTER_1_DN	45	5	6.50206e-06	0.00447098	AHNAK2:HIST1H2BJ:HIST1H2AG:VPS52:RPS18	http://www.gsea-msigdb.org/gsea/msigdb/cards/FIGUEROA_AML_METHYLATION_CLUSTER_1_DN
	Curated_gene_sets	REACTOME_INTERLEUKIN_20_FAMILY_SIGNALING	26	4	1.52035e-05	0.00929271	STAT1:STAT4:IL20RA:IL22RA2	http://www.gsea-msigdb.org/gsea/msigdb/cards/REACTOME_INTERLEUKIN_20_FAMILY_SIGNALING
	Curated_gene_sets	REACTOME_SIGNALING_BY_NUCLEAR_RECEPTORS	261	9	2.49522e-05	0.0137262	USF1:UHMK1:AKT1:HIST1H4H:HIST1H2BJ:HIST1H2BK:HIST1H4I:MYB:ALDH1A1	http://www.gsea-msigdb.org/gsea/msigdb/cards/REACTOME_SIGNALING_BY_NUCLEAR_RECEPTORS
	Curated_gene_sets	LIAN_LIPA_TARGETS_3M	61	5	2.93536e-05	0.0142962	FCER1G:FCGR2A:FCGR2B:MS4A7:SLC40A1	http://www.gsea-msigdb.org/gsea/msigdb/cards/LIAN_LIPA_TARGETS_3M
	Curated_gene_sets	RUAN_RESPONSE_TO_TNF_UP	11	3	3.11861e-05	0.0142962	STAT1:OR2H2:IFNGR1	http://www.gsea-msigdb.org/gsea/msigdb/cards/RUAN_RESPONSE_TO_TNF_UP
	Curated_gene_sets	TAKEDA_TARGETS_OF_NUP98_HOXA9_FUSION_8D_UP	156	7	3.87702e-05	0.0158368	PLD4:LGALS3BP:SLC40A1:STAT1:MAP7:IL22RA2:ALDH1A1	http://www.gsea-msigdb.org/gsea/msigdb/cards/TAKEDA_TARGETS_OF_NUP98_HOXA9_FUSION_8D_UP
	Curated_gene_sets	BOGNI_TREATMENT_RELATED_MYELOID_LEUKEMIA_DN	33	4	4.03044e-05	0.0158368	BTN3A3:VPS52:RGL2:MYB	http://www.gsea-msigdb.org/gsea/msigdb/cards/BOGNI_TREATMENT_RELATED_MYELOID_LEUKEMIA_DN
	Curated_gene_sets	REACTOME_ESR_MEDIATED_SIGNALING	218	8	4.56844e-05	0.016754	USF1:UHMK1:AKT1:HIST1H4H:HIST1H2BJ:HIST1H2BK:HIST1H4I:MYB	http://www.gsea-msigdb.org/gsea/msigdb/cards/REACTOME_ESR_MEDIATED_SIGNALING
	Curated_gene_sets	BENPORATH_MYC_MAX_TARGETS	774	15	5.49574e-05	0.0185199	ATF6:GPR132:BTN2A1:ABT1:HIST1H2BJ:HIST1H2AG:HIST1H4I:SLC39A7:VPS52:WDR46:RGL2:DAXX:CUTA:MAP3K5:IFNGR1	http://www.gsea-msigdb.org/gsea/msigdb/cards/BENPORATH_MYC_MAX_TARGETS
	Curated_gene_sets	REACTOME_PRC2_METHYLATES_HISTONES_AND_DNA	70	5	5.72329e-05	0.0185199	HIST1H4H:HIST1H2BJ:HIST1H2BK:HIST1H4I:PHF1	http://www.gsea-msigdb.org/gsea/msigdb/cards/REACTOME_PRC2_METHYLATES_HISTONES_AND_DNA
	Curated_gene_sets	REACTOME_ERCC6_CSB_AND_EHMT2_G9A_POSITIVELY_REGULATE_RRNA_EXPRESSION	73	5	7.00301e-05	0.0203081	MTA1:HIST1H4H:HIST1H2BJ:HIST1H2BK:HIST1H4I	http://www.gsea-msigdb.org/gsea/msigdb/cards/REACTOME_ERCC6_CSB_AND_EHMT2_G9A_POSITIVELY_REGULATE_RRNA_EXPRESSION
	Curated_gene_sets	WANG_ESOPHAGUS_CANCER_VS_NORMAL_UP	118	6	7.01424e-05	0.0203081	FCER1G:BTN3A3:BAK1:IFNGR1:TNFAIP3:CALU	http://www.gsea-msigdb.org/gsea/msigdb/cards/WANG_ESOPHAGUS_CANCER_VS_NORMAL_UP
	Curated_gene_sets	REACTOME_OXIDATIVE_STRESS_INDUCED_SENESCENCE	121	6	8.06365e-05	0.0211359	HIST1H4H:HIST1H2BJ:HIST1H2BK:HIST1H4I:RING1:MAP3K5	http://www.gsea-msigdb.org/gsea/msigdb/cards/REACTOME_OXIDATIVE_STRESS_INDUCED_SENESCENCE
	Curated_gene_sets	CHARAFE_BREAST_CANCER_LUMINAL_VS_BASAL_DN	454	11	8.08135e-05	0.0211359	INPP1:NAB1:STAT4:MYO1B:NABP1:BTN3A2:BTN3A3:IFNGR1:TNFAIP3:PERP:CCDC28A	http://www.gsea-msigdb.org/gsea/msigdb/cards/CHARAFE_BREAST_CANCER_LUMINAL_VS_BASAL_DN
	Curated_gene_sets	RUAN_RESPONSE_TO_TNF_TROGLITAZONE_UP	15	3	8.4528e-05	0.0211359	STAT1:OR2H2:IFNGR1	http://www.gsea-msigdb.org/gsea/msigdb/cards/RUAN_RESPONSE_TO_TNF_TROGLITAZONE_UP
	Curated_gene_sets	MISSIAGLIA_REGULATED_BY_METHYLATION_UP	126	6	0.000100874	0.0241265	STAT1:HIST1H2BK:IFNGR1:TNFAIP3:PERP:UBE2H	http://www.gsea-msigdb.org/gsea/msigdb/cards/MISSIAGLIA_REGULATED_BY_METHYLATION_UP
	Curated_gene_sets	TARTE_PLASMA_CELL_VS_PLASMABLAST_UP	393	10	0.000114569	0.0257974	FCER1G:MPZ:FCGR3B:DDR2:BTN2A2:HIST1H4I:RPS18:MLN:TNFAIP3:ALDH1A1	http://www.gsea-msigdb.org/gsea/msigdb/cards/TARTE_PLASMA_CELL_VS_PLASMABLAST_UP
	Curated_gene_sets	NAKAYAMA_SOFT_TISSUE_TUMORS_PCA1_UP	82	5	0.000121929	0.0257974	FCGR2A:HSPA6:FCGR3A:FCGR2B:GABBR1	http://www.gsea-msigdb.org/gsea/msigdb/cards/NAKAYAMA_SOFT_TISSUE_TUMORS_PCA1_UP
	Curated_gene_sets	REACTOME_ROLE_OF_PHOSPHOLIPIDS_IN_PHAGOCYTOSIS	82	5	0.000121929	0.0257974	FCGR2A:FCGR3A:PLD4:IGHG4:ITPR3	http://www.gsea-msigdb.org/gsea/msigdb/cards/REACTOME_ROLE_OF_PHOSPHOLIPIDS_IN_PHAGOCYTOSIS
	Curated_gene_sets	BROWNE_HCMV_INFECTION_48HR_DN	482	11	0.000136535	0.0271485	DDR2:CEP170B:MTA1:LGALS3BP:STAT1:BTN3A2:HIST1H4I:OR2H2:MLN:MYB:CETN2	http://www.gsea-msigdb.org/gsea/msigdb/cards/BROWNE_HCMV_INFECTION_48HR_DN
	Curated_gene_sets	BURTON_ADIPOGENESIS_6	191	7	0.000138185	0.0271485	SDHC:HIBCH:NABP1:AGPAT3:OR2H2:IMPDH1:ALDH1A1	http://www.gsea-msigdb.org/gsea/msigdb/cards/BURTON_ADIPOGENESIS_6
	Curated_gene_sets	REACTOME_TRANSCRIPTIONAL_REGULATION_OF_GRANULOPOIESIS	87	5	0.000161273	0.0294741	HIST1H4H:HIST1H2BJ:HIST1H2BK:HIST1H4I:MYB	http://www.gsea-msigdb.org/gsea/msigdb/cards/REACTOME_TRANSCRIPTIONAL_REGULATION_OF_GRANULOPOIESIS
	Curated_gene_sets	SMITH_LIVER_CANCER	47	4	0.000164819	0.0294741	SDHC:PFDN6:TNFAIP3:ALDH1A1	http://www.gsea-msigdb.org/gsea/msigdb/cards/SMITH_LIVER_CANCER
	Curated_gene_sets	REACTOME_HATS_ACETYLATE_HISTONES	138	6	0.000166097	0.0294741	HIST1H4H:HIST1H2BJ:HIST1H2AG:HIST1H2BK:HIST1H4I:HIST1H2AH	http://www.gsea-msigdb.org/gsea/msigdb/cards/REACTOME_HATS_ACETYLATE_HISTONES
	Curated_gene_sets	RODWELL_AGING_KIDNEY_UP	497	11	0.00017798	0.0298365	ARHGAP30:FCER1G:MS4A7:SLC40A1:BTN3A3:GABBR1:WDR46:TAPBP:ITPR3:RPS10:CALU	http://www.gsea-msigdb.org/gsea/msigdb/cards/RODWELL_AGING_KIDNEY_UP
	Curated_gene_sets	REACTOME_INOSITOL_PHOSPHATE_METABOLISM	48	4	0.000178986	0.0298365	PLD4:INPP1:IP6K3:NUDT3	http://www.gsea-msigdb.org/gsea/msigdb/cards/REACTOME_INOSITOL_PHOSPHATE_METABOLISM
	Curated_gene_sets	REACTOME_EPIGENETIC_REGULATION_OF_GENE_EXPRESSION	145	6	0.000217274	0.0351536	MTA1:HIST1H4H:HIST1H2BJ:HIST1H2BK:HIST1H4I:PHF1	http://www.gsea-msigdb.org/gsea/msigdb/cards/REACTOME_EPIGENETIC_REGULATION_OF_GENE_EXPRESSION
	Curated_gene_sets	REACTOME_ESTROGEN_DEPENDENT_GENE_EXPRESSION	147	6	0.000233966	0.0367728	USF1:HIST1H4H:HIST1H2BJ:HIST1H2BK:HIST1H4I:MYB	http://www.gsea-msigdb.org/gsea/msigdb/cards/REACTOME_ESTROGEN_DEPENDENT_GENE_EXPRESSION
	Curated_gene_sets	KEGG_FC_GAMMA_R_MEDIATED_PHAGOCYTOSIS	96	5	0.000255721	0.0390755	FCGR2A:FCGR3A:FCGR2B:FCGR2C:AKT1	http://www.gsea-msigdb.org/gsea/msigdb/cards/KEGG_FC_GAMMA_R_MEDIATED_PHAGOCYTOSIS
	Curated_gene_sets	ACEVEDO_LIVER_CANCER_WITH_H3K27ME3_DN	215	7	0.000284996	0.042372	TMEM121:HIST1H4H:HIST1H2BJ:HIST1H2AG:HIST1H2BK:HIST1H4I:HIST1H2AH	http://www.gsea-msigdb.org/gsea/msigdb/cards/ACEVEDO_LIVER_CANCER_WITH_H3K27ME3_DN
	Curated_gene_sets	REACTOME_ADAPTIVE_IMMUNE_SYSTEM	807	14	0.000303386	0.0427823	FCGR3A:FCGR2B:AKT1:BTBD6:CD300E:ICAM3:BTN3A2:BTN2A2:BTN3A3:BTN2A1:BTN1A1:TAPBP:ITPR3:UBE2H	http://www.gsea-msigdb.org/gsea/msigdb/cards/REACTOME_ADAPTIVE_IMMUNE_SYSTEM
	Curated_gene_sets	REACTOME_DEPURINATION	55	4	0.000303889	0.0427823	HIST1H4H:HIST1H2BJ:HIST1H2BK:HIST1H4I	http://www.gsea-msigdb.org/gsea/msigdb/cards/REACTOME_DEPURINATION
	Curated_gene_sets	KEGG_JAK_STAT_SIGNALING_PATHWAY	155	6	0.000311088	0.0427823	AKT1:STAT1:STAT4:IL20RA:IL22RA2:IFNGR1	http://www.gsea-msigdb.org/gsea/msigdb/cards/KEGG_JAK_STAT_SIGNALING_PATHWAY
	Curated_gene_sets	GRAESSMANN_APOPTOSIS_BY_DOXORUBICIN_UP	1121	17	0.000335883	0.0443706	F11R:FCGR3B:UHMK1:SIVA1:CRIP2:LGALS3BP:STAT1:NABP1:SLC39A7:WDR46:TAPBP:DAXX:MTFR2:PERP:TSPAN33:ALDH1A1:CETN2	http://www.gsea-msigdb.org/gsea/msigdb/cards/GRAESSMANN_APOPTOSIS_BY_DOXORUBICIN_UP
	Curated_gene_sets	WIELAND_UP_BY_HBV_INFECTION	102	5	0.000338769	0.0443706	FCER1G:STAT1:BTN3A3:GABBR1:TAPBP	http://www.gsea-msigdb.org/gsea/msigdb/cards/WIELAND_UP_BY_HBV_INFECTION
	Curated_gene_sets	REACTOME_POSITIVE_EPIGENETIC_REGULATION_OF_RRNA_EXPRESSION	103	5	0.000354383	0.0453364	MTA1:HIST1H4H:HIST1H2BJ:HIST1H2BK:HIST1H4I	http://www.gsea-msigdb.org/gsea/msigdb/cards/REACTOME_POSITIVE_EPIGENETIC_REGULATION_OF_RRNA_EXPRESSION
	Curated_gene_sets	KYNG_DNA_DAMAGE_BY_4NQO_OR_UV	58	4	0.000372916	0.0466229	MTA1:INPP1:KIFC1:IFNGR1	http://www.gsea-msigdb.org/gsea/msigdb/cards/KYNG_DNA_DAMAGE_BY_4NQO_OR_UV
	Curated_gene_sets	REACTOME_AMYLOID_FIBER_FORMATION	106	5	0.000404505	0.0494485	HIST1H4H:HIST1H2BJ:HIST1H2BK:HIST1H4I:TSPAN33	http://www.gsea-msigdb.org/gsea/msigdb/cards/REACTOME_AMYLOID_FIBER_FORMATION
	Computational_gene_sets	GCM_HMGA2	123	8	6.78575e-07	0.000246998	FCGR2A:FCGR2B:STAT4:SLC17A2:RING1:GRM4:IRF5:NRF1	http://www.gsea-msigdb.org/gsea/msigdb/cards/GCM_HMGA2
	Computational_gene_sets	GCM_FANCC	126	8	8.15257e-07	0.000246998	SDHC:FCGR2A:FCGR2B:SLC17A2:RING1:GRM4:TAF11:NRF1	http://www.gsea-msigdb.org/gsea/msigdb/cards/GCM_FANCC
	Computational_gene_sets	GCM_TEC	32	5	1.13977e-06	0.000246998	FCGR2A:SLC17A2:RING1:GRM4:NRF1	http://www.gsea-msigdb.org/gsea/msigdb/cards/GCM_TEC
	Computational_gene_sets	GCM_SUPT4H1	58	6	1.15151e-06	0.000246998	SDHC:FCGR2A:FCGR2B:RING1:GRM4:NRF1	http://www.gsea-msigdb.org/gsea/msigdb/cards/GCM_SUPT4H1
	Computational_gene_sets	MODULE_84	541	14	4.10231e-06	0.000703956	FCER1G:FCGR2A:HSPA6:FCGR3A:FCGR2B:MS4A7:ICAM3:SLC40A1:STAT1:STAT4:HIST1H2BK:ITPR3:IFNGR1:TNFAIP3	http://www.gsea-msigdb.org/gsea/msigdb/cards/MODULE_84
	Computational_gene_sets	MODULE_5	433	12	1.02833e-05	0.00147051	FCER1G:FCGR2A:FCGR3A:FCGR3B:STAT1:MYO1B:SLC39A7:ITPR3:IFNGR1:TNFAIP3:CALU:ALDH1A1	http://www.gsea-msigdb.org/gsea/msigdb/cards/MODULE_5
	Computational_gene_sets	MODULE_45	576	13	3.78904e-05	0.00464428	FCER1G:FCGR2A:HSPA6:FCGR3A:FCGR2B:FCGR3B:ICAM3:STAT1:STAT4:BTN3A2:HIST1H2BK:IFNGR1:TNFAIP3	http://www.gsea-msigdb.org/gsea/msigdb/cards/MODULE_45
	Computational_gene_sets	GCM_BNIP1	78	5	9.61338e-05	0.0103103	SDHC:FCGR2A:RING1:GRM4:IRF5	http://www.gsea-msigdb.org/gsea/msigdb/cards/GCM_BNIP1
	Computational_gene_sets	MODULE_424	18	3	0.000149648	0.0142664	FCER1G:FCGR2A:FCGR3A	http://www.gsea-msigdb.org/gsea/msigdb/cards/MODULE_424
	Computational_gene_sets	MODULE_478	19	3	0.000176943	0.0151817	FCER1G:FCGR2A:FCGR3A	http://www.gsea-msigdb.org/gsea/msigdb/cards/MODULE_478
	Computational_gene_sets	GCM_PRKAG1	50	4	0.000209924	0.0163741	FCGR2B:RING1:GRM4:TAF11	http://www.gsea-msigdb.org/gsea/msigdb/cards/GCM_PRKAG1
	Computational_gene_sets	MODULE_168	22	3	0.000277605	0.0177833	HIST1H2BJ:HIST1H2BK:MAP7	http://www.gsea-msigdb.org/gsea/msigdb/cards/MODULE_168
	Computational_gene_sets	MODULE_222	22	3	0.000277605	0.0177833	HIST1H2BJ:HIST1H2BK:MAP7	http://www.gsea-msigdb.org/gsea/msigdb/cards/MODULE_222
	Computational_gene_sets	MODULE_111	153	6	0.00029017	0.0177833	MPZ:FCGR2A:FCGR2B:STAT4:GRM4:IRF5	http://www.gsea-msigdb.org/gsea/msigdb/cards/MODULE_111
	Computational_gene_sets	GCM_SMARCD1	105	5	0.000387239	0.0221501	FCGR2A:SLC17A2:RING1:GRM4:TAF11	http://www.gsea-msigdb.org/gsea/msigdb/cards/GCM_SMARCD1
	Computational_gene_sets	MODULE_2	380	9	0.000423662	0.0227189	MPZ:HSPA6:GLS:GABBR1:ITPR3:IFNGR1:TNFAIP3:CALU:ALDH1A1	http://www.gsea-msigdb.org/gsea/msigdb/cards/MODULE_2
	Computational_gene_sets	GCM_RING1	112	5	0.000520602	0.0257067	SDHC:FCGR2A:RING1:GRM4:NRF1	http://www.gsea-msigdb.org/gsea/msigdb/cards/GCM_RING1
	Computational_gene_sets	MODULE_98	393	9	0.000539302	0.0257067	AKT1:MTA1:STAT1:HMGN4:HIST1H2BK:TAF11:MAP7:CALU:NRF1	http://www.gsea-msigdb.org/gsea/msigdb/cards/MODULE_98
	Computational_gene_sets	GCM_BECN1	68	4	0.000684039	0.0308898	SDHC:FCGR2B:RING1:GRM4	http://www.gsea-msigdb.org/gsea/msigdb/cards/GCM_BECN1
	Computational_gene_sets	GCM_DPF2	32	3	0.000856529	0.0367451	SDHC:RING1:GRM4	http://www.gsea-msigdb.org/gsea/msigdb/cards/GCM_DPF2
	KEGG	KEGG_SYSTEMIC_LUPUS_ERYTHEMATOSUS	135	11	4.84327e-10	9.00848e-08	FCGR2A:FCGR3A:FCGR2B:FCGR2C:FCGR3B:HIST1H4H:HIST1H2BJ:HIST1H2AG:HIST1H2BK:HIST1H4I:HIST1H2AH	http://www.gsea-msigdb.org/gsea/msigdb/cards/KEGG_SYSTEMIC_LUPUS_ERYTHEMATOSUS
	KEGG	KEGG_LEISHMANIA_INFECTION	70	6	3.51954e-06	0.000327317	FCGR2A:FCGR3A:FCGR2C:FCGR3B:STAT1:IFNGR1	http://www.gsea-msigdb.org/gsea/msigdb/cards/KEGG_LEISHMANIA_INFECTION
	KEGG	KEGG_FC_GAMMA_R_MEDIATED_PHAGOCYTOSIS	96	5	0.000255721	0.0144656	FCGR2A:FCGR3A:FCGR2B:FCGR2C:AKT1	http://www.gsea-msigdb.org/gsea/msigdb/cards/KEGG_FC_GAMMA_R_MEDIATED_PHAGOCYTOSIS
	KEGG	KEGG_JAK_STAT_SIGNALING_PATHWAY	155	6	0.000311088	0.0144656	AKT1:STAT1:STAT4:IL20RA:IL22RA2:IFNGR1	http://www.gsea-msigdb.org/gsea/msigdb/cards/KEGG_JAK_STAT_SIGNALING_PATHWAY
	TF_targets	KRCTCNNNNMANAGC_UNKNOWN	66	5	4.30666e-05	0.0262706	HIST1H2BJ:HIST1H2AG:HIST1H2BK:HIST1H2AH:ZBTB9	http://www.gsea-msigdb.org/gsea/msigdb/cards/KRCTCNNNNMANAGC_UNKNOWN
	TF_targets	IRF_Q6	245	8	0.000103208	0.0314783	USF1:FCGR2B:FCGR2C:SLC40A1:SLC39A7:TAPBP:MYB:KLF14	http://www.gsea-msigdb.org/gsea/msigdb/cards/IRF_Q6
	TF_targets	OCT1_B	268	8	0.000190744	0.0387846	STAT4:HIST1H2BK:HIST1H2AH:ITPR3:UQCC2:OLIG3:CEP41:ALDH1A1	http://www.gsea-msigdb.org/gsea/msigdb/cards/OCT1_B
	TF_targets	CAGCTG_AP4_Q5	1535	21	0.00027299	0.0416309	F11R:USF1:FCER1G:FCRLA:FCRLB:AKT1:CRIP2:HSD17B8:PHF1:CUTA:ITPR3:IP6K3:LEMD2:SCUBE3:MAP3K5:PEX7:IMPDH1:FLNC:TSPAN33:UBE2H:ALDH1A1	http://www.gsea-msigdb.org/gsea/msigdb/cards/CAGCTG_AP4_Q5
	TF_targets	SCGGAAGY_ELK1_02	1248	18	0.000408079	0.0497856	F11R:USF1:UHMK1:SLC39A7:RING1:VPS52:RPS18:B3GALT4:WDR46:PFDN6:ZBTB9:TAF11:ANKS1A:CCDC28A:CALU:TNPO3:TPI1P2:CEP41	http://www.gsea-msigdb.org/gsea/msigdb/cards/SCGGAAGY_ELK1_02
	Reactome	REACTOME_BUTYROPHILIN_BTN_FAMILY_INTERACTIONS	12	5	4.92897e-09	7.38852e-06	BTN3A2:BTN2A2:BTN3A3:BTN2A1:BTN1A1	http://www.gsea-msigdb.org/gsea/msigdb/cards/REACTOME_BUTYROPHILIN_BTN_FAMILY_INTERACTIONS
	Reactome	REACTOME_HDACS_DEACETYLATE_HISTONES	91	7	1.10947e-06	0.000831546	MTA1:HIST1H4H:HIST1H2BJ:HIST1H2AG:HIST1H2BK:HIST1H4I:HIST1H2AH	http://www.gsea-msigdb.org/gsea/msigdb/cards/REACTOME_HDACS_DEACETYLATE_HISTONES
	Reactome	REACTOME_INTERLEUKIN_20_FAMILY_SIGNALING	26	4	1.52035e-05	0.00759668	STAT1:STAT4:IL20RA:IL22RA2	http://www.gsea-msigdb.org/gsea/msigdb/cards/REACTOME_INTERLEUKIN_20_FAMILY_SIGNALING
	Reactome	REACTOME_SIGNALING_BY_NUCLEAR_RECEPTORS	261	9	2.49522e-05	0.00935083	USF1:UHMK1:AKT1:HIST1H4H:HIST1H2BJ:HIST1H2BK:HIST1H4I:MYB:ALDH1A1	http://www.gsea-msigdb.org/gsea/msigdb/cards/REACTOME_SIGNALING_BY_NUCLEAR_RECEPTORS
	Reactome	REACTOME_ESR_MEDIATED_SIGNALING	218	8	4.56844e-05	0.0136962	USF1:UHMK1:AKT1:HIST1H4H:HIST1H2BJ:HIST1H2BK:HIST1H4I:MYB	http://www.gsea-msigdb.org/gsea/msigdb/cards/REACTOME_ESR_MEDIATED_SIGNALING
	Reactome	REACTOME_PRC2_METHYLATES_HISTONES_AND_DNA	70	5	5.72329e-05	0.0142987	HIST1H4H:HIST1H2BJ:HIST1H2BK:HIST1H4I:PHF1	http://www.gsea-msigdb.org/gsea/msigdb/cards/REACTOME_PRC2_METHYLATES_HISTONES_AND_DNA
	Reactome	REACTOME_ERCC6_CSB_AND_EHMT2_G9A_POSITIVELY_REGULATE_RRNA_EXPRESSION	73	5	7.00301e-05	0.0149965	MTA1:HIST1H4H:HIST1H2BJ:HIST1H2BK:HIST1H4I	http://www.gsea-msigdb.org/gsea/msigdb/cards/REACTOME_ERCC6_CSB_AND_EHMT2_G9A_POSITIVELY_REGULATE_RRNA_EXPRESSION
	Reactome	REACTOME_OXIDATIVE_STRESS_INDUCED_SENESCENCE	121	6	8.06365e-05	0.0151093	HIST1H4H:HIST1H2BJ:HIST1H2BK:HIST1H4I:RING1:MAP3K5	http://www.gsea-msigdb.org/gsea/msigdb/cards/REACTOME_OXIDATIVE_STRESS_INDUCED_SENESCENCE
	Reactome	REACTOME_ROLE_OF_PHOSPHOLIPIDS_IN_PHAGOCYTOSIS	82	5	0.000121929	0.020308	FCGR2A:FCGR3A:PLD4:IGHG4:ITPR3	http://www.gsea-msigdb.org/gsea/msigdb/cards/REACTOME_ROLE_OF_PHOSPHOLIPIDS_IN_PHAGOCYTOSIS
	Reactome	REACTOME_TRANSCRIPTIONAL_REGULATION_OF_GRANULOPOIESIS	87	5	0.000161273	0.0223584	HIST1H4H:HIST1H2BJ:HIST1H2BK:HIST1H4I:MYB	http://www.gsea-msigdb.org/gsea/msigdb/cards/REACTOME_TRANSCRIPTIONAL_REGULATION_OF_GRANULOPOIESIS
	Reactome	REACTOME_HATS_ACETYLATE_HISTONES	138	6	0.000166097	0.0223584	HIST1H4H:HIST1H2BJ:HIST1H2AG:HIST1H2BK:HIST1H4I:HIST1H2AH	http://www.gsea-msigdb.org/gsea/msigdb/cards/REACTOME_HATS_ACETYLATE_HISTONES
	Reactome	REACTOME_INOSITOL_PHOSPHATE_METABOLISM	48	4	0.000178986	0.0223584	PLD4:INPP1:IP6K3:NUDT3	http://www.gsea-msigdb.org/gsea/msigdb/cards/REACTOME_INOSITOL_PHOSPHATE_METABOLISM
	Reactome	REACTOME_EPIGENETIC_REGULATION_OF_GENE_EXPRESSION	145	6	0.000217274	0.0250511	MTA1:HIST1H4H:HIST1H2BJ:HIST1H2BK:HIST1H4I:PHF1	http://www.gsea-msigdb.org/gsea/msigdb/cards/REACTOME_EPIGENETIC_REGULATION_OF_GENE_EXPRESSION
	Reactome	REACTOME_ESTROGEN_DEPENDENT_GENE_EXPRESSION	147	6	0.000233966	0.0250511	USF1:HIST1H4H:HIST1H2BJ:HIST1H2BK:HIST1H4I:MYB	http://www.gsea-msigdb.org/gsea/msigdb/cards/REACTOME_ESTROGEN_DEPENDENT_GENE_EXPRESSION
	Reactome	REACTOME_ADAPTIVE_IMMUNE_SYSTEM	807	14	0.000303386	0.0284706	FCGR3A:FCGR2B:AKT1:BTBD6:CD300E:ICAM3:BTN3A2:BTN2A2:BTN3A3:BTN2A1:BTN1A1:TAPBP:ITPR3:UBE2H	http://www.gsea-msigdb.org/gsea/msigdb/cards/REACTOME_ADAPTIVE_IMMUNE_SYSTEM
	Reactome	REACTOME_DEPURINATION	55	4	0.000303889	0.0284706	HIST1H4H:HIST1H2BJ:HIST1H2BK:HIST1H4I	http://www.gsea-msigdb.org/gsea/msigdb/cards/REACTOME_DEPURINATION
	Reactome	REACTOME_POSITIVE_EPIGENETIC_REGULATION_OF_RRNA_EXPRESSION	103	5	0.000354383	0.0312483	MTA1:HIST1H4H:HIST1H2BJ:HIST1H2BK:HIST1H4I	http://www.gsea-msigdb.org/gsea/msigdb/cards/REACTOME_POSITIVE_EPIGENETIC_REGULATION_OF_RRNA_EXPRESSION
	Reactome	REACTOME_AMYLOID_FIBER_FORMATION	106	5	0.000404505	0.0336863	HIST1H4H:HIST1H2BJ:HIST1H2BK:HIST1H4I:TSPAN33	http://www.gsea-msigdb.org/gsea/msigdb/cards/REACTOME_AMYLOID_FIBER_FORMATION
	Reactome	REACTOME_RNA_POLYMERASE_I_TRANSCRIPTION	108	5	0.000440772	0.0343695	MTA1:HIST1H4H:HIST1H2BJ:HIST1H2BK:HIST1H4I	http://www.gsea-msigdb.org/gsea/msigdb/cards/REACTOME_RNA_POLYMERASE_I_TRANSCRIPTION
	Reactome	REACTOME_BASE_EXCISION_REPAIR_AP_SITE_FORMATION	62	4	0.000481494	0.0343695	HIST1H4H:HIST1H2BJ:HIST1H2BK:HIST1H4I	http://www.gsea-msigdb.org/gsea/msigdb/cards/REACTOME_BASE_EXCISION_REPAIR_AP_SITE_FORMATION
	Reactome	REACTOME_DNA_METHYLATION	62	4	0.000481494	0.0343695	HIST1H4H:HIST1H2BJ:HIST1H2BK:HIST1H4I	http://www.gsea-msigdb.org/gsea/msigdb/cards/REACTOME_DNA_METHYLATION
	Reactome	REACTOME_ACTIVATED_PKN1_STIMULATES_TRANSCRIPTION_OF_AR_ANDROGEN_RECEPTOR_REGULATED_GENES_KLK2_AND_KLK3	64	4	0.000543456	0.0362063	HIST1H4H:HIST1H2BJ:HIST1H2BK:HIST1H4I	http://www.gsea-msigdb.org/gsea/msigdb/cards/REACTOME_ACTIVATED_PKN1_STIMULATES_TRANSCRIPTION_OF_AR_ANDROGEN_RECEPTOR_REGULATED_GENES_KLK2_AND_KLK3
	Reactome	REACTOME_SIRT1_NEGATIVELY_REGULATES_RRNA_EXPRESSION	65	4	0.00057647	0.0362063	HIST1H4H:HIST1H2BJ:HIST1H2BK:HIST1H4I	http://www.gsea-msigdb.org/gsea/msigdb/cards/REACTOME_SIRT1_NEGATIVELY_REGULATES_RRNA_EXPRESSION
	Reactome	REACTOME_OLFACTORY_SIGNALING_PATHWAY	397	9	0.000579687	0.0362063	OR2W1:OR2J1:OR5V1:OR12D3:OR12D2:OR11A1:OR10C1:OR2H1:OR2H2	http://www.gsea-msigdb.org/gsea/msigdb/cards/REACTOME_OLFACTORY_SIGNALING_PATHWAY
	Reactome	REACTOME_NONHOMOLOGOUS_END_JOINING_NHEJ	69	4	0.000722848	0.0433419	HIST1H4H:HIST1H2BJ:HIST1H2BK:HIST1H4I	http://www.gsea-msigdb.org/gsea/msigdb/cards/REACTOME_NONHOMOLOGOUS_END_JOINING_NHEJ
	Reactome	REACTOME_CONDENSATION_OF_PROPHASE_CHROMOSOMES	71	4	0.000805093	0.0454302	HIST1H4H:HIST1H2BJ:HIST1H2BK:HIST1H4I	http://www.gsea-msigdb.org/gsea/msigdb/cards/REACTOME_CONDENSATION_OF_PROPHASE_CHROMOSOMES
	Reactome	REACTOME_SUMOYLATION	187	6	0.000836792	0.0454302	MTA1:HIST1H4H:HIST1H4I:RING1:DAXX:CETN2	http://www.gsea-msigdb.org/gsea/msigdb/cards/REACTOME_SUMOYLATION
	Reactome	REACTOME_NUCLEOSOME_ASSEMBLY	72	4	0.000848596	0.0454302	HIST1H4H:HIST1H2BJ:HIST1H2BK:HIST1H4I	http://www.gsea-msigdb.org/gsea/msigdb/cards/REACTOME_NUCLEOSOME_ASSEMBLY
	Reactome	REACTOME_RUNX1_REGULATES_TRANSCRIPTION_OF_GENES_INVOLVED_IN_DIFFERENTIATION_OF_HSCS	127	5	0.000919569	0.0466522	HIST1H4H:HIST1H2BJ:HIST1H2BK:HIST1H4I:MYB	http://www.gsea-msigdb.org/gsea/msigdb/cards/REACTOME_RUNX1_REGULATES_TRANSCRIPTION_OF_GENES_INVOLVED_IN_DIFFERENTIATION_OF_HSCS
	Reactome	REACTOME_CELLULAR_SENESCENCE	191	6	0.000933667	0.0466522	HIST1H4H:HIST1H2BJ:HIST1H2BK:HIST1H4I:RING1:MAP3K5	http://www.gsea-msigdb.org/gsea/msigdb/cards/REACTOME_CELLULAR_SENESCENCE
	Reactome	REACTOME_RMTS_METHYLATE_HISTONE_ARGININES	76	4	0.00103925	0.0491823	HIST1H4H:HIST1H2AG:HIST1H4I:HIST1H2AH	http://www.gsea-msigdb.org/gsea/msigdb/cards/REACTOME_RMTS_METHYLATE_HISTONE_ARGININES
	Reactome	REACTOME_CHROMATIN_ORGANIZATION	268	7	0.00104992	0.0491823	MTA1:HIST1H4H:HIST1H2BJ:HIST1H2AG:HIST1H2BK:HIST1H4I:HIST1H2AH	http://www.gsea-msigdb.org/gsea/msigdb/cards/REACTOME_CHROMATIN_ORGANIZATION
	Reactome	REACTOME_DNA_DOUBLE_STRAND_BREAK_RESPONSE	77	4	0.00109125	0.049569	HIST1H4H:HIST1H2BJ:HIST1H2BK:HIST1H4I	http://www.gsea-msigdb.org/gsea/msigdb/cards/REACTOME_DNA_DOUBLE_STRAND_BREAK_RESPONSE
	Canonical_Pathways	KEGG_SYSTEMIC_LUPUS_ERYTHEMATOSUS	135	11	4.84327e-10	1.06503e-06	FCGR2A:FCGR3A:FCGR2B:FCGR2C:FCGR3B:HIST1H4H:HIST1H2BJ:HIST1H2AG:HIST1H2BK:HIST1H4I:HIST1H2AH	http://www.gsea-msigdb.org/gsea/msigdb/cards/KEGG_SYSTEMIC_LUPUS_ERYTHEMATOSUS
	Canonical_Pathways	REACTOME_BUTYROPHILIN_BTN_FAMILY_INTERACTIONS	12	5	4.92897e-09	5.4194e-06	BTN3A2:BTN2A2:BTN3A3:BTN2A1:BTN1A1	http://www.gsea-msigdb.org/gsea/msigdb/cards/REACTOME_BUTYROPHILIN_BTN_FAMILY_INTERACTIONS
	Canonical_Pathways	REACTOME_HDACS_DEACETYLATE_HISTONES	91	7	1.10947e-06	0.000813239	MTA1:HIST1H4H:HIST1H2BJ:HIST1H2AG:HIST1H2BK:HIST1H4I:HIST1H2AH	http://www.gsea-msigdb.org/gsea/msigdb/cards/REACTOME_HDACS_DEACETYLATE_HISTONES
	Canonical_Pathways	KEGG_LEISHMANIA_INFECTION	70	6	3.51954e-06	0.00193487	FCGR2A:FCGR3A:FCGR2C:FCGR3B:STAT1:IFNGR1	http://www.gsea-msigdb.org/gsea/msigdb/cards/KEGG_LEISHMANIA_INFECTION
	Canonical_Pathways	REACTOME_INTERLEUKIN_20_FAMILY_SIGNALING	26	4	1.52035e-05	0.00668649	STAT1:STAT4:IL20RA:IL22RA2	http://www.gsea-msigdb.org/gsea/msigdb/cards/REACTOME_INTERLEUKIN_20_FAMILY_SIGNALING
	Canonical_Pathways	REACTOME_SIGNALING_BY_NUCLEAR_RECEPTORS	261	9	2.49522e-05	0.00914497	USF1:UHMK1:AKT1:HIST1H4H:HIST1H2BJ:HIST1H2BK:HIST1H4I:MYB:ALDH1A1	http://www.gsea-msigdb.org/gsea/msigdb/cards/REACTOME_SIGNALING_BY_NUCLEAR_RECEPTORS
	Canonical_Pathways	REACTOME_ESR_MEDIATED_SIGNALING	218	8	4.56844e-05	0.0143514	USF1:UHMK1:AKT1:HIST1H4H:HIST1H2BJ:HIST1H2BK:HIST1H4I:MYB	http://www.gsea-msigdb.org/gsea/msigdb/cards/REACTOME_ESR_MEDIATED_SIGNALING
	Canonical_Pathways	REACTOME_PRC2_METHYLATES_HISTONES_AND_DNA	70	5	5.72329e-05	0.0157319	HIST1H4H:HIST1H2BJ:HIST1H2BK:HIST1H4I:PHF1	http://www.gsea-msigdb.org/gsea/msigdb/cards/REACTOME_PRC2_METHYLATES_HISTONES_AND_DNA
	Canonical_Pathways	REACTOME_ERCC6_CSB_AND_EHMT2_G9A_POSITIVELY_REGULATE_RRNA_EXPRESSION	73	5	7.00301e-05	0.0171107	MTA1:HIST1H4H:HIST1H2BJ:HIST1H2BK:HIST1H4I	http://www.gsea-msigdb.org/gsea/msigdb/cards/REACTOME_ERCC6_CSB_AND_EHMT2_G9A_POSITIVELY_REGULATE_RRNA_EXPRESSION
	Canonical_Pathways	REACTOME_OXIDATIVE_STRESS_INDUCED_SENESCENCE	121	6	8.06365e-05	0.017732	HIST1H4H:HIST1H2BJ:HIST1H2BK:HIST1H4I:RING1:MAP3K5	http://www.gsea-msigdb.org/gsea/msigdb/cards/REACTOME_OXIDATIVE_STRESS_INDUCED_SENESCENCE
	Canonical_Pathways	REACTOME_ROLE_OF_PHOSPHOLIPIDS_IN_PHAGOCYTOSIS	82	5	0.000121929	0.0243747	FCGR2A:FCGR3A:PLD4:IGHG4:ITPR3	http://www.gsea-msigdb.org/gsea/msigdb/cards/REACTOME_ROLE_OF_PHOSPHOLIPIDS_IN_PHAGOCYTOSIS
	Canonical_Pathways	REACTOME_TRANSCRIPTIONAL_REGULATION_OF_GRANULOPOIESIS	87	5	0.000161273	0.0280959	HIST1H4H:HIST1H2BJ:HIST1H2BK:HIST1H4I:MYB	http://www.gsea-msigdb.org/gsea/msigdb/cards/REACTOME_TRANSCRIPTIONAL_REGULATION_OF_GRANULOPOIESIS
	Canonical_Pathways	REACTOME_HATS_ACETYLATE_HISTONES	138	6	0.000166097	0.0280959	HIST1H4H:HIST1H2BJ:HIST1H2AG:HIST1H2BK:HIST1H4I:HIST1H2AH	http://www.gsea-msigdb.org/gsea/msigdb/cards/REACTOME_HATS_ACETYLATE_HISTONES
	Canonical_Pathways	REACTOME_INOSITOL_PHOSPHATE_METABOLISM	48	4	0.000178986	0.0281136	PLD4:INPP1:IP6K3:NUDT3	http://www.gsea-msigdb.org/gsea/msigdb/cards/REACTOME_INOSITOL_PHOSPHATE_METABOLISM
	Canonical_Pathways	REACTOME_EPIGENETIC_REGULATION_OF_GENE_EXPRESSION	145	6	0.000217274	0.0318523	MTA1:HIST1H4H:HIST1H2BJ:HIST1H2BK:HIST1H4I:PHF1	http://www.gsea-msigdb.org/gsea/msigdb/cards/REACTOME_EPIGENETIC_REGULATION_OF_GENE_EXPRESSION
	Canonical_Pathways	REACTOME_ESTROGEN_DEPENDENT_GENE_EXPRESSION	147	6	0.000233966	0.0321557	USF1:HIST1H4H:HIST1H2BJ:HIST1H2BK:HIST1H4I:MYB	http://www.gsea-msigdb.org/gsea/msigdb/cards/REACTOME_ESTROGEN_DEPENDENT_GENE_EXPRESSION
	Canonical_Pathways	KEGG_FC_GAMMA_R_MEDIATED_PHAGOCYTOSIS	96	5	0.000255721	0.0330782	FCGR2A:FCGR3A:FCGR2B:FCGR2C:AKT1	http://www.gsea-msigdb.org/gsea/msigdb/cards/KEGG_FC_GAMMA_R_MEDIATED_PHAGOCYTOSIS
	Canonical_Pathways	REACTOME_ADAPTIVE_IMMUNE_SYSTEM	807	14	0.000303386	0.0342041	FCGR3A:FCGR2B:AKT1:BTBD6:CD300E:ICAM3:BTN3A2:BTN2A2:BTN3A3:BTN2A1:BTN1A1:TAPBP:ITPR3:UBE2H	http://www.gsea-msigdb.org/gsea/msigdb/cards/REACTOME_ADAPTIVE_IMMUNE_SYSTEM
	Canonical_Pathways	REACTOME_DEPURINATION	55	4	0.000303889	0.0342041	HIST1H4H:HIST1H2BJ:HIST1H2BK:HIST1H4I	http://www.gsea-msigdb.org/gsea/msigdb/cards/REACTOME_DEPURINATION
	Canonical_Pathways	KEGG_JAK_STAT_SIGNALING_PATHWAY	155	6	0.000311088	0.0342041	AKT1:STAT1:STAT4:IL20RA:IL22RA2:IFNGR1	http://www.gsea-msigdb.org/gsea/msigdb/cards/KEGG_JAK_STAT_SIGNALING_PATHWAY
	Canonical_Pathways	REACTOME_POSITIVE_EPIGENETIC_REGULATION_OF_RRNA_EXPRESSION	103	5	0.000354383	0.037109	MTA1:HIST1H4H:HIST1H2BJ:HIST1H2BK:HIST1H4I	http://www.gsea-msigdb.org/gsea/msigdb/cards/REACTOME_POSITIVE_EPIGENETIC_REGULATION_OF_RRNA_EXPRESSION
	Canonical_Pathways	REACTOME_AMYLOID_FIBER_FORMATION	106	5	0.000404505	0.0404321	HIST1H4H:HIST1H2BJ:HIST1H2BK:HIST1H4I:TSPAN33	http://www.gsea-msigdb.org/gsea/msigdb/cards/REACTOME_AMYLOID_FIBER_FORMATION
	Canonical_Pathways	REACTOME_RNA_POLYMERASE_I_TRANSCRIPTION	108	5	0.000440772	0.0421416	MTA1:HIST1H4H:HIST1H2BJ:HIST1H2BK:HIST1H4I	http://www.gsea-msigdb.org/gsea/msigdb/cards/REACTOME_RNA_POLYMERASE_I_TRANSCRIPTION
	Canonical_Pathways	REACTOME_DNA_METHYLATION	62	4	0.000481494	0.042307	HIST1H4H:HIST1H2BJ:HIST1H2BK:HIST1H4I	http://www.gsea-msigdb.org/gsea/msigdb/cards/REACTOME_DNA_METHYLATION
	Canonical_Pathways	REACTOME_BASE_EXCISION_REPAIR_AP_SITE_FORMATION	62	4	0.000481494	0.042307	HIST1H4H:HIST1H2BJ:HIST1H2BK:HIST1H4I	http://www.gsea-msigdb.org/gsea/msigdb/cards/REACTOME_BASE_EXCISION_REPAIR_AP_SITE_FORMATION
	Canonical_Pathways	BIOCARTA_IFNG_PATHWAY	6	2	0.00050022	0.042307	STAT1:IFNGR1	http://www.gsea-msigdb.org/gsea/msigdb/cards/BIOCARTA_IFNG_PATHWAY
	Canonical_Pathways	REACTOME_ACTIVATED_PKN1_STIMULATES_TRANSCRIPTION_OF_AR_ANDROGEN_RECEPTOR_REGULATED_GENES_KLK2_AND_KLK3	64	4	0.000543456	0.0439563	HIST1H4H:HIST1H2BJ:HIST1H2BK:HIST1H4I	http://www.gsea-msigdb.org/gsea/msigdb/cards/REACTOME_ACTIVATED_PKN1_STIMULATES_TRANSCRIPTION_OF_AR_ANDROGEN_RECEPTOR_REGULATED_GENES_KLK2_AND_KLK3
	Canonical_Pathways	REACTOME_SIRT1_NEGATIVELY_REGULATES_RRNA_EXPRESSION	65	4	0.00057647	0.0439563	HIST1H4H:HIST1H2BJ:HIST1H2BK:HIST1H4I	http://www.gsea-msigdb.org/gsea/msigdb/cards/REACTOME_SIRT1_NEGATIVELY_REGULATES_RRNA_EXPRESSION
	Canonical_Pathways	REACTOME_OLFACTORY_SIGNALING_PATHWAY	397	9	0.000579687	0.0439563	OR2W1:OR2J1:OR5V1:OR12D3:OR12D2:OR11A1:OR10C1:OR2H1:OR2H2	http://www.gsea-msigdb.org/gsea/msigdb/cards/REACTOME_OLFACTORY_SIGNALING_PATHWAY
	Canonical_Pathways	PID_INTEGRIN2_PATHWAY	29	3	0.000639171	0.0468513	F11R:FCGR2A:ICAM3	http://www.gsea-msigdb.org/gsea/msigdb/cards/PID_INTEGRIN2_PATHWAY

## Sheet: Table S7
	Supplementary Table 7. The result output of tans-ethnic genetic correlation anlaysis.
		h2 (observed)	SE	h2 (liability)	p-value
	European	0.075683	0.0171944	0.0234503	1.0745e-05
	Japanese	0.00871099	0.00397148	0.0511557	0.0282796
	ρge	0.737875	0.417773	0.737875	0.530375

## Sheet: Table S8
	Supplementary Table 8. The result of trans-ethnic meta-analysis for the Japanese GWAS lead SNPs.
	CHR	BP	SNP	GENE	A1	A2	P-value	OR	95% CI		Q	I2	BETA	SE
	1	161660696	rs6697139	FCGR	T	G	0.0003076	1.1342	1.05922	1.21449	0	96.94	0.125928	0.0348944
	2	191943742	rs11889341	STAT4	T	C	2.499e-22	1.4299	1.33041	1.53683	0.4432	0	0.357605	0.0367939
	6	138197506	rs5029949	TNFAIP3	G	A	7.991e-13	1.4376	1.30165	1.58775	0.2923	9.82	0.362975	0.0506856
	7	128575797	rs1450734198	KCP/IRF5	NA	NA	NA	NA	NA	NA	NA	NA	NA	NA
	14	105408955	rs2819422	AHNAK2	G	A	3.078e-10	0.8447	0.801457	0.890277	0.0007	91.32	-0.168774	0.0268116
	NA, not assessed due to the absence in the Euroepan meta-analysis summary statistics; Q, Cochran's Q; I2, I2 statistics defined as I2 = 100×(Q-df)/Q
	CHR, chromosome; BP, base position (GRCh37); SNP, single nucleotide polymorphisim; OR, odds ratio; CI, confidence interval; BETA, β coefficient; SE, standard error of mean

## Sheet: Table S9
	Supplementary Table 9 The 95% credible sets identified by fine-mapping for the trans-ethnic meta-GWAS
	CHR	BP	SNP	Ref	Alt	MAF	P-value	PP	cPP
	TNFSF4/LOC100506023
	1	173243581	rs844663	T	C	0.249112	4.875e-12	0.879161	0.879161
	1	173238736	rs2022449	G	T	0.191348	1.767e-11	0.0800307	0.959191
	STAT4
	2	191959489	rs4853458	A	G	0.329732	3.242e-35	0.999459	0.999459
	ARHGAP31
	3	119116150	rs9884090	G	A	0.281503	6.98e-13	0.880513	0.880513
	3	119174383	rs12636784	A	G	0.26431	2.121e-12	0.10356	0.984073
	LINC01980-CMC1-EOMES
	3	28074673	rs398390	T	C	0.437269	1.626e-08	0.417613	0.417613
	3	28075170	rs819991	G	T	0.437067	2.083e-08	0.25902	0.676633
	3	28076257	rs388368	C	T	0.437205	2.374e-08	0.201283	0.877916
	3	28078932	rs173082	T	C	0.437371	4.411e-08	0.0610015	0.938917
	3	28078979	rs338611	A	G	0.437368	4.417e-08	0.0608421	0.999759
	FLNB
	3	58131515	rs7355798	C	T	0.0996602	3.501e-10	0.289186	0.289186
	3	58132808	rs9809281	G	A	0.100015	5.279e-10	0.131533	0.420719
	3	58132809	rs9809038	C	T	0.100015	5.279e-10	0.131533	0.552252
	3	58375286	rs4076852	G	A	0.256457	5.409e-10	0.0867825	0.639034
	3	58374433	rs7612923	A	G	0.256458	5.635e-10	0.0801756	0.71921
	3	58372885	rs7653734	T	C	0.256647	6.132e-10	0.0680609	0.787271
	3	58332783	rs7652027	A	G	0.230266	6.73e-10	0.0596224	0.846893
	3	58332912	rs4681681	C	T	0.23028	6.735e-10	0.0595353	0.906428
	3	58332496	rs4681845	C	T	0.227677	6.903e-10	0.0570547	0.963483
	IL12A-AS1
	3	159733527	rs589446	G	T	0.131423	8.188e-10	0.892846	0.892846
	3	159745863	rs485499	T	C	0.132385	2.571e-09	0.09885	0.991696
	DGKQ
	4	965779	rs11724804	G	A	0.430252	1.622e-10	0.974826	0.974826
	NFKB1
	4	103449041	rs230534	T	C	0.360622	4.238e-12	0.987573	0.987573
	TNIP1
	5	150455732	rs3792783	A	G	0.21931	2.079e-12	0.999324	0.999324
	PRDM1-ATG5
	6	106568034	rs548234	C	T	0.330691	6.305e-11	0.985627	0.985627
	TNFAIP3
	6	138195151	rs5029937	G	T	0.0612469	1.233e-13	0.446595	0.446595
	6	138196066	rs2230926	G	T	0.062329	1.677e-13	0.250405	0.697
	6	138195723	rs5029939	C	G	0.061265	1.672e-13	0.24972	0.946719
	6	138223490	rs9494893	G	T	0.0607568	7.825e-13	0.0130935	0.959813
	KCP-IRF5
	7	128573967	rs4728142	G	A	0.170667	1.515e-15	0.999999	0.999999
	FAM167A-BLK
	8	11343973	rs2736340	C	T	0.310378	1.22e-26	1	1
	LINC01301-RAB2A
	8	61396829	rs2013112	T	C	0.404873	1.126e-09	0.0685399	0.0685399
	8	61399587	rs6471885	C	T	0.404535	1.286e-09	0.0530036	0.121543
	8	61517798	rs600811	C	T	0.406764	1.314e-09	0.0507733	0.172317
	8	61398085	rs7824045	A	G	0.404748	1.317e-09	0.0506085	0.222925
	8	61398160	rs7842586	T	C	0.404748	1.317e-09	0.0506085	0.273534
	8	61518273	rs603035	C	T	0.406795	1.319e-09	0.0504005	0.323934
	8	61534895	rs629268	C	T	0.405411	1.696e-09	0.0310058	0.35494
	8	61523998	rs687978	C	T	0.406501	1.789e-09	0.0279447	0.382885
	8	61494991	rs10808709	G	C	0.407898	1.816e-09	0.0271246	0.410009
	8	61534428	rs7413	A	G	0.405411	1.88e-09	0.0254025	0.435412
	8	61525395	rs669599	G	A	0.40641	1.914e-09	0.0245223	0.459934
	8	61528876	rs2625441	T	G	0.406501	2.012e-09	0.0222627	0.482197
	8	61415926	rs11995549	G	A	0.409096	2.061e-09	0.0212186	0.503415
	8	61418365	rs2326560	C	T	0.409096	2.061e-09	0.0212186	0.524634
	8	61409871	rs6471886	G	T	0.409078	2.083e-09	0.0207873	0.545421
	8	61418431	rs2326561	C	T	0.409096	2.165e-09	0.0192908	0.564712
	8	61526953	rs625850	A	G	0.406911	2.245e-09	0.0180053	0.582717
	8	61395832	rs6992869	T	C	0.408288	2.347e-09	0.0165093	0.599227
	8	61399283	rs6471882	A	G	0.408314	2.351e-09	0.0164547	0.615681
	8	61408810	rs2096890	G	A	0.409456	2.36e-09	0.0163231	0.632005
	8	61412809	rs7820393	T	C	0.412118	2.401e-09	0.015765	0.64777
	8	61475274	rs2326568	T	G	0.407928	2.451e-09	0.0151841	0.662954
	8	61459716	rs3929643	A	G	0.40833	2.565e-09	0.0139027	0.676856
	8	61490395	rs4452821	G	A	0.407898	2.603e-09	0.0135161	0.690372
	8	61436559	rs55825491	C	T	0.408911	2.695e-09	0.0126306	0.703003
	8	61494331	rs7829359	C	T	0.408141	2.891e-09	0.0110318	0.714035
	8	61445098	rs13276831	C	T	0.408078	2.951e-09	0.0106025	0.724637
	8	61492728	rs6993019	G	A	0.407586	2.974e-09	0.0104474	0.735085
	8	61488238	rs12678742	C	T	0.407898	3.016e-09	0.0101661	0.745251
	8	61486366	rs12680781	G	A	0.407898	3.132e-09	0.00945057	0.754701
	8	61484788	rs3735825	C	G	0.407597	3.196e-09	0.0090896	0.763791
	8	61512060	rs10957150	C	A	0.397845	3.591e-09	0.00729903	0.77109
	8	61535709	rs652422	G	C	0.403698	3.602e-09	0.00722968	0.77832
	8	61403965	rs948421	T	C	0.407189	3.65e-09	0.00703249	0.785352
	8	61539278	rs615031	A	T	0.408262	3.798e-09	0.00650831	0.791861
	8	61512042	rs10808710	G	A	0.401307	3.871e-09	0.00629915	0.79816
	8	61537523	rs1120591	T	C	0.400004	3.95e-09	0.0060628	0.804223
	8	61406197	rs2155829	T	C	0.407171	4.117e-09	0.00557226	0.809795
	8	61519325	rs617834	T	C	0.404945	4.213e-09	0.00533641	0.815131
	8	61481614	rs10098769	T	G	0.404634	4.24e-09	0.0052719	0.820403
	8	61425258	rs6988120	T	C	0.407321	4.304e-09	0.00511333	0.825516
	8	61504193	rs2326571	G	A	0.404755	4.465e-09	0.00477016	0.830287
	8	61504093	rs2326570	A	G	0.404755	4.505e-09	0.00468864	0.834975
	8	61450894	rs7815543	G	A	0.405693	4.55e-09	0.00459686	0.839572
	8	61463647	rs41420549	A	T	0.405945	4.571e-09	0.00455546	0.844128
	8	61505275	rs1319105	C	G	0.404654	4.639e-09	0.00443068	0.848558
	8	61457044	rs10957144	T	C	0.40591	4.831e-09	0.00409362	0.852652
	8	61446683	rs13262390	T	A	0.405881	4.858e-09	0.00404984	0.856702
	8	61453916	rs7000166	G	T	0.405881	4.858e-09	0.00404984	0.860751
	8	61468134	rs7012181	T	C	0.405851	4.875e-09	0.00402266	0.864774
	8	61471839	rs2056415	T	C	0.405851	4.875e-09	0.00402266	0.868797
	8	61457009	rs10096140	G	A	0.405858	4.884e-09	0.00400833	0.872805
	8	61505331	rs1319104	G	A	0.404595	4.902e-09	0.00398293	0.876788
	8	61457785	rs35625652	A	C	0.405602	5.131e-09	0.00364438	0.880432
	8	61476541	rs2326569	G	T	0.405988	5.257e-09	0.00347669	0.883909
	8	61417284	rs7822169	A	G	0.403619	5.376e-09	0.00333424	0.887243
	8	61411475	rs9643523	T	C	0.403645	5.441e-09	0.00325766	0.890501
	8	61419728	rs2875974	G	A	0.403619	5.449e-09	0.00324847	0.89375
	8	61424568	rs7834395	A	G	0.403619	5.458e-09	0.00323813	0.896988
	8	61411196	rs1208362159	C	T	0.4036	5.472e-09	0.00322218	0.90021
	8	61411196	rs7827453	C	T	0.4036	5.472e-09	0.00322218	0.90021
	8	61488859	rs2946154	A	G	0.406001	5.469e-09	0.00322096	0.903431
	8	61397551	rs7841675	T	A	0.406858	5.501e-09	0.00318325	0.906614
	8	61513098	rs12681129	T	A	0.40524	5.594e-09	0.00308474	0.909699
	8	61564964	rs685985	T	A	0.391899	5.633e-09	0.00306973	0.912768
	8	61467655	rs11996592	C	T	0.405803	5.838e-09	0.00283955	0.915608
	8	61452046	rs2272620	A	G	0.405999	5.844e-09	0.00283359	0.918442
	8	61500402	rs10957147	G	A	0.404863	5.963e-09	0.0027272	0.921169
	8	61467003	rs13439252	T	G	0.405663	5.975e-09	0.00271533	0.923884
	8	61485570	rs56294255	C	T	0.405799	6.016e-09	0.00267948	0.926564
	8	61516915	rs684066	G	A	0.405052	6.066e-09	0.00263815	0.929202
	8	61437759	rs6471888	A	G	0.406814	6.112e-09	0.00259721	0.931799
	8	61496950	rs3735826	C	T	0.404575	6.154e-09	0.00256649	0.934365
	8	61516897	rs586377	A	G	0.405147	6.245e-09	0.00249387	0.936859
	8	61442940	rs10957142	T	C	0.405692	6.266e-09	0.00247695	0.939336
	8	61455861	rs7839474	A	G	0.405505	6.381e-09	0.0023917	0.941728
	8	61452302	rs2272621	G	C	0.405692	6.482e-09	0.00231998	0.944048
	8	61464227	rs9298039	T	C	0.405817	6.492e-09	0.00231291	0.946361
	8	61349350	rs10108692	T	C	0.41012	6.524e-09	0.00228534	0.948646
	8	61386533	rs7839516	T	C	0.410659	6.592e-09	0.00223934	0.950886
	DDX6
	11	118642085	rs10892286	A	C	0.137777	1.072e-10	0.131061	0.131061
	11	118639353	rs11217020	A	G	0.137229	1.156e-10	0.113479	0.244541
	11	118653503	rs10892290	G	T	0.137785	1.327e-10	0.086863	0.331404
	11	118653517	rs10892291	T	C	0.137785	1.327e-10	0.086863	0.418267
	11	118646003	rs10892289	C	T	0.137863	1.37e-10	0.081669	0.499936
	11	118648373	rs56043232	T	C	0.137769	1.379e-10	0.0806641	0.5806
	11	118655645	rs874621	A	G	0.137785	1.386e-10	0.0798776	0.660477
	11	118655340	rs10892292	G	C	0.137768	1.409e-10	0.0773871	0.737864
	11	118644694	rs10892288	A	G	0.137764	1.459e-10	0.0723583	0.810223
	11	118628373	rs74676029	T	C	0.137764	1.786e-10	0.0490071	0.85923
	11	118636980	rs10892283	A	G	0.137777	1.793e-10	0.0486375	0.907867
	11	118619960	rs3889239	T	C	0.13775	3.182e-10	0.0161132	0.923981
	11	118619253	rs2004781	C	T	0.13775	3.193e-10	0.0160065	0.939987
	11	118618776	rs1048024	A	T	0.137765	3.313e-10	0.0149083	0.954895
	11	118615340	rs56758835	G	A	0.138108	3.378e-10	0.0143477	0.969243
	11	118615785	rs11217009	C	T	0.13796	3.611e-10	0.0126236	0.981866
	11	118610549	rs11826521	G	T	0.138373	4.284e-10	0.00907432	0.990941
	AHNAK2
	14	105413223	rs55797226	A	G	0.397082	1.279e-11	0.248361	0.248361
	14	105407208	rs11851053	T	C	0.396108	1.293e-11	0.243295	0.491656
	14	105407798	rs4465542	T	C	0.396108	1.951e-11	0.109312	0.600968
	14	105405599	rs3742935	C	G	0.396117	2.171e-11	0.0888056	0.689774
	14	105410411	rs11160825	C	T	0.375999	2.699e-11	0.0589327	0.748707
	14	105407031	rs11623422	A	G	0.386718	3.14e-11	0.0435935	0.7923
	14	105413204	rs2582514	T	G	0.385218	3.585e-11	0.0337278	0.826028
	14	105405942	rs28454709	G	A	0.386629	3.637e-11	0.0327665	0.858794
	14	105402994	rs10083374	C	T	0.386637	3.77e-11	0.0305574	0.889352
	14	105403474	rs10149193	C	T	0.386637	3.776e-11	0.0304631	0.919815
	14	105402786	rs10083496	G	A	0.386233	3.979e-11	0.0275231	0.947338
	14	105404384	rs1048257	C	T	0.386711	4.487e-11	0.0217856	0.969124
	14	105408030	rs9671643	A	G	0.387186	4.796e-11	0.0191355	0.988259
	14	105402418	rs10083490	T	C	0.386684	7.336e-11	0.00838404	0.996643
	CSK
	15	75077367	rs1378942	A	C	0.23318	8.665e-15	0.98769	0.98769
	IRF8-LINC01082
	16	85971922	rs11117420	C	G	0.133272	1.121e-17	0.657915	0.657915
	16	85972013	rs11117422	G	C	0.133057	1.699e-17	0.293004	0.950918
	GSDMB
	17	38063381	rs883770	T	C	0.305376	1.018e-09	0.148357	0.148357
	17	38063929	rs36000226	T	C	0.305343	1.045e-09	0.141036	0.289392
	17	38063738	rs62067034	C	T	0.305393	1.069e-09	0.134966	0.424358
	17	38062217	rs2305479	C	T	0.309201	1.186e-09	0.109865	0.534223
	17	38049102	rs12950209	T	C	0.304027	1.363e-09	0.0845051	0.618728
	17	38049233	rs12950743	T	C	0.308148	1.436e-09	0.0759902	0.694718
	17	38048244	rs9906951	T	C	0.303962	1.723e-09	0.0537139	0.748432
	17	38045725	rs12103884	C	T	0.304068	1.848e-09	0.0469052	0.795337
	17	38031164	rs11658278	T	C	0.304133	1.853e-09	0.0466568	0.841994
	17	38042777	rs9908132	T	A,G	0.304046	2.337e-09	0.0297958	0.87179
	17	38043343	rs9901146	G	A	0.304049	2.397e-09	0.0283712	0.900161
	17	37929816	rs2313430	T	C	0.382688	2.429e-09	0.0255249	0.925686
	17	38031030	rs9903250	G	A	0.304225	2.988e-09	0.0185281	0.944214
	17	37976469	rs9303277	C	T	0.361652	3.019e-09	0.0170513	0.961265
	SLC12A5
	20	44688665	rs9074	G	A	0.309569	2.25e-08	0.81335	0.81335
	20	44692598	rs13037326	C	T	0.304331	4.852e-08	0.18665	1
	Lead SNPs are highlighted in bold
	GWAS, genome-wide association study; SNP, single nucletodie polymorphism; CHR, chromosome; BP, base position;
	Ref, reference allele; Alt, aleternatice allele; MAF, minor allele frequency; PP, posterior probability; cPP, cumulative posterior probability

## Sheet: Table S10
	Supplementary Table 10 The 95% credible sets identified by fine-mapping for the European meta-GWAS
	CHR	POS	SNP	Ref	Alt	MAF	P-value	PP*	cPP**
	IL12RB2
	1	67814440	rs3790566			0.243539	3.842e-10	0.668064	0.668064
	1	67809317	rs10889683			0.243539	9.494e-10	0.117322	0.785386
	1	67815915	rs3977726			0.242545	1.176e-09	0.0778585	0.863244
	1	67817872	rs3828068			0.243539	1.465e-09	0.0509858	0.91423
	1	67822377	rs3790567			0.243539	1.726e-09	0.037214	0.951444
	TNFSF4-LOC100506023-PRDX6
	1	173332629	rs1857066			0.254473	5.017e-09	0.160157	0.160157
	1	173331762	rs7528321			0.254473	5.137e-09	0.153058	0.313215
	1	173323918	rs11576547			0.251491	5.456e-09	0.136893	0.450107
	1	173319839	rs2027499			0.251491	5.816e-09	0.121106	0.571213
	1	173327347	rs35407548			0.251491	6.035e-09	0.112819	0.684032
	1	173326832	rs11577727			0.251491	6.226e-09	0.106276	0.790308
	1	173315876	rs12750865			0.251491	9.184e-09	0.0504462	0.840754
	1	173318329	rs11577537			0.251491	1.001e-08	0.0427721	0.883526
	1	173315625	rs17346550			0.251491	1.366e-08	0.0235793	0.907105
	1	173310806	rs34746916			0.251491	1.89e-08	0.0126637	0.919769
	1	173310061	rs6681162			0.251491	1.943e-08	0.0120108	0.93178
	1	173310742	rs34972373			0.251491	1.963e-08	0.0117777	0.943558
	1	173311999	rs12742673			0.251491	2.01e-08	0.0112562	0.954814
	STAT4
	2	191902758	rs3821236			0.198807	1.942e-23	1	1
	FLNB-DNASE1L3-PXK
	3	58375286	rs4076852			0.260437	1.036e-10	0.195817	0.195817
	3	58374433	rs7612923			0.260437	1.093e-10	0.176609	0.372426
	3	58372885	rs7653734			0.261431	1.207e-10	0.145721	0.518147
	3	58332912	rs4681681			0.261431	1.301e-10	0.126109	0.644256
	3	58332783	rs7652027			0.261431	1.301e-10	0.126109	0.770365
	3	58332496	rs4681845			0.261431	1.609e-10	0.0837364	0.854101
	3	58446010	rs7631010			0.260437	1.618e-10	0.082927	0.937028
	3	58370177	rs6445975			0.261431	1.992e-10	0.0554941	0.992522
	POGLUT1-TIMMDC1-CD80-ARHGAP31
	3	119116150	rs9884090			0.15507	1.893e-10	0.997702	0.997702
	IL12A
	3	159733527	rs589446			0.349901	1.954e-10	0.720094	0.720094
	3	159745863	rs485499			0.348907	3.285e-10	0.264391	0.984486
	DGKQ
	4	965779	rs11724804			0.441352	5.312e-11	0.965969	0.965969
	NFKB1
	4	103449041	rs230534			0.337972	5.379e-09	0.398058	0.398058
	4	103457418	rs230529			0.406561	8.145e-09	0.171355	0.569413
	4	103470193	rs230517			0.406561	9.486e-09	0.127833	0.697247
	4	103463328	rs230521			0.406561	9.912e-09	0.117482	0.814729
	4	103458825	rs230526			0.406561	1.112e-08	0.0941855	0.908914
	4	103457585	rs230528			0.406561	1.132e-08	0.0910137	0.999928
	ATG5
	6	106734040	rs633724			0.354871	2.841e-09	0.845443	0.845443
	6	106734189	rs9486314			0.126243	8.563e-09	0.137499	0.982942
	IRF5-TNPO3
	7	128651522	rs36073657			0.100398	3.104e-21	0.0841115	0.0841115
	7	128671086	rs34871361			0.100398	3.119e-21	0.0833366	0.167448
	7	128657483	rs12539476			0.100398	3.31e-21	0.0743492	0.241797
	7	128643297	rs13227075			0.100398	3.31e-21	0.0743492	0.316146
	7	128663173	rs13236009			0.100398	3.31e-21	0.0743492	0.390496
	7	128666825	rs34381587			0.100398	3.31e-21	0.0743492	0.464845
	7	128641653	rs34725944			0.100398	3.31e-21	0.0743492	0.539194
	7	128648953	rs35234849			0.100398	3.31e-21	0.0743492	0.613543
	7	128665542	rs71581958			0.100398	3.31e-21	0.0743492	0.687892
	7	128647942	rs13238352			0.100398	3.516e-21	0.0662115	0.754104
	7	128681062	rs17339836			0.100398	4.813e-21	0.036235	0.790339
	7	128625019	rs12535158			0.100398	4.88e-21	0.0352859	0.825625
	7	128616582	rs12706861			0.100398	4.982e-21	0.0339121	0.859537
	7	128624073	rs12534421			0.100398	5.062e-21	0.0328907	0.892427
	7	128611035	rs12536266			0.100398	5.112e-21	0.0322758	0.924703
	7	128618559	rs17338998			0.100398	6.033e-21	0.0234838	0.948187
	7	128684316	rs62478615			0.100398	6.305e-21	0.0215776	0.969764
	FAM167A-BLK
	8	11343973	rs2736340			0.243539	3.331e-21	1	1
	CDHR5-IRF7
	11	618172	rs6598008			0.559642	1.967e-08	0.418424	0.418424
	11	618998	rs2740375			0.558648	2.279e-08	0.315288	0.733712
	11	617537	rs2740380			0.559642	2.489e-08	0.266288	1
	TSPAN32,CD81-AS1
	11	2348619	rs2651804			0.173956	2.54e-10	0.422241	0.422241
	11	2348194	rs10765944			0.173956	3.599e-10	0.216533	0.638774
	11	2347549	rs2651784			0.172962	4.428e-10	0.145739	0.784513
	11	2342763	rs2521288			0.172962	9.241e-10	0.0356334	0.820146
	11	2345621	rs11022291			0.172962	1.25e-09	0.0199915	0.840138
	11	2345677	rs2651781			0.172962	1.36e-09	0.017013	0.857151
	11	2345948	rs2521292			0.172962	1.403e-09	0.0160296	0.87318
	11	2343769	rs11529116			0.171968	1.601e-09	0.0124703	0.885651
	11	2343777	rs11529117			0.171968	1.601e-09	0.0124703	0.898121
	11	2345890	rs2651783			0.172962	1.719e-09	0.0108695	0.908991
	11	2343441	rs11600971			0.172962	1.778e-09	0.0101903	0.919181
	11	2343506	rs12797765			0.172962	1.922e-09	0.0087805	0.927961
	11	2343516	rs12799224			0.172962	1.922e-09	0.0087805	0.936742
	11	2345417	rs11022289			0.172962	1.951e-09	0.00853267	0.945275
	11	2344894	rs11517725			0.172962	1.951e-09	0.00853267	0.953807
	DDX6
	11	118639353	rs11217020			0.200795	2.079e-11	0.142094	0.142094
	11	118642085	rs10892286			0.200795	2.118e-11	0.1371	0.279193
	11	118653503	rs10892290			0.200795	2.7e-11	0.0859157	0.365109
	11	118653517	rs10892291			0.200795	2.7e-11	0.0859157	0.451025
	11	118648373	rs56043232			0.200795	2.829e-11	0.0785344	0.529559
	11	118655645	rs874621			0.200795	2.83e-11	0.078481	0.60804
	11	118646003	rs10892289			0.200795	2.841e-11	0.0778972	0.685938
	11	118655340	rs10892292			0.200795	2.864e-11	0.0766977	0.762635
	11	118644694	rs10892288			0.200795	2.982e-11	0.0709635	0.833599
	11	118628373	rs74676029			0.200795	3.73e-11	0.0461299	0.879729
	11	118636980	rs10892283			0.200795	3.775e-11	0.0450776	0.924806
	11	118619960	rs3889239			0.200795	7.14e-11	0.0132296	0.938036
	11	118619253	rs2004781			0.200795	7.164e-11	0.0131445	0.95118
	CSK
	15	75077367	rs1378942			0.61332	1.842e-14	0.987154	0.987154
	IRF8
	16	85971922	rs11117420			0.194831	3.818e-15	0.510409	0.510409
	16	85972013	rs11117422			0.194831	5.787e-15	0.228254	0.738664
	16	85972810	rs13335265			0.194831	9.328e-15	0.0906377	0.829301
	16	85973028	rs12711490			0.194831	1.089e-14	0.0671813	0.896483
	16	85972612	rs11644034			0.193837	1.122e-14	0.0634052	0.959888
	IKZF3-GSDMB
	17	38063381	rs883770			0.501988	4.794e-09	0.161661	0.161661
	17	38063929	rs36000226			0.501988	4.912e-09	0.154269	0.31593
	17	38063738	rs62067034			0.501988	5.05e-09	0.146257	0.462187
	17	38062217	rs2305479			0.501988	5.478e-09	0.125059	0.587246
	17	38049102	rs12950209			0.507952	7.019e-09	0.0776295	0.664875
	17	38049233	rs12950743			0.507952	7.23e-09	0.0733298	0.738205
	17	38048244	rs9906951			0.507952	8.944e-09	0.0487038	0.786909
	17	38031164	rs11658278			0.507952	9.5e-09	0.0433704	0.830279
	17	38045725	rs12103884			0.507952	9.56e-09	0.0428485	0.873128
	17	38042777	rs9908132			0.507952	1.251e-08	0.0255494	0.898677
	17	38043343	rs9901146			0.507952	1.285e-08	0.0242659	0.922943
	17	38038389	rs12939565			0.507952	1.415e-08	0.0201632	0.943106
	17	38031030	rs9903250			0.507952	1.574e-08	0.0164319	0.959538
	Lead SNPs are highlighted in bold
	GWAS, genome-wide association study; SNP, single nucletodie polymorphism; CHR, chromosome; BP, base position;
	Ref, reference allele; Alt, aleternatice allele; MAF, minor allele frequency; PP, posterior probability; cPP, cumulative posterior probability

[truncated: 16 more sheets: Table S11, Table S12, Table S13, Table S14, Table S15, Table S16, Table S17, Table S18, Table S19, Table S20, Table S21, Table S22, Table S23, Table S24, Table S25, Table S26]
